# Supplementary material for: Rare genetic variation at transcription factor binding sites modulates local DNA methylation profiles
Source: PLoS Genet. 2020 Nov 20;16(11):e1009189. doi: 10.1371/journal.pgen.1009189 (PMC7679001; doi:10.1371/journal.pgen.1009189)
Supplement: S2 Table — (XLSX) [file pgen.1009189.s004.xlsx]

## Sheet: Suppl Table
S2 Table. List of differentially methylated regions due to the disruption of TFBS by rare SNVs
Chr, hg19	Start TFBS	End TFBS	Rare SNV MapInfo	Name TFBS	Carrier rare SNV	Illumina EPIC ProbeID with extreme methylation	DMR coordinates (chr:start-end)	DMR Carriers	Number of samples with DMRs	Illumina EPIC ProbeID
chr1	999663	999681	999668	AP1	1-00625	cg11405655,cg21139076,cg07549208	chr1:999598-999889	1-00625	1	cg11405655,cg25523405,cg02105666,cg21139076,cg07549208
chr1	1148447	1148457	1148449	TCF12	1-04782	cg01437515,cg12759096,cg22335801,cg14661234	chr1:1148314-1149193	1-04782	1	cg01437515,cg12759096,cg22335801,cg14661234
chr1	1148447	1148457	1148449	TCF3	1-04782	cg01437515,cg12759096,cg22335801,cg14661234	chr1:1148314-1149193	1-04782	1	cg01437515,cg12759096,cg22335801,cg14661234
chr1	1267200	1267214	1267205	CTCF	1-05597	cg16430279,cg24252805,cg04910752,cg13246026,cg06802641,cg03402404,cg10065209	chr1:1266177-1268145	1-00655,1-06506,1-04389,1-07386,1-06690,1-05597	6	cg20705390,cg04981007,cg16430279,cg15365642,cg24252805,cg14890378,cg07346648,cg08037114,cg04910752,cg13246026,cg21396988,cg06802641,cg03402404,cg10065209,cg08621441,cg18386618
chr1	1295809	1295823	1295814	UAK42	1-03038	cg13354934,cg14375163,cg20426768	chr1:1293867-1297808	1-04870,1-03038,1-01238,1-02234,1-06506,1-06643,1-04911,1-04926,1-02900,1-02917,1-02959,1-00894,1-03676,1-01049,1-01869,1-02408,1-04523,1-04588,1-05437,1-05613,1-00806,1-05093	22	cg27399052,cg12478066,cg23036947,cg17132079,cg03397519,cg22273474,cg18550476,cg00970622,cg01198994,cg13393580,cg26108719,cg13354934,cg14375163,cg20426768,cg24153574,cg23569098,cg21165029,cg12915036,cg03400623,cg22109675,cg15492552,cg05572157,cg18534079
chr1	3240154	3240168	3240159	RXRA	1-01242	cg12753787,cg03254465	chr1:3239138-3240387	1-04893,1-01019,1-04466,1-00770,1-00808,1-03897,1-01242,1-06643	8	cg07797660,cg12753787,cg01418153,cg03254465,cg03692239
chr1	7887420	7887434	7887424	UAK42	1-04893	cg17328665,cg08926642,cg04767226,cg09168692	chr1:7886632-7887943	1-00157,1-00389,1-00400,1-04835,1-04870,1-04893,1-04975,1-05009,1-05124,1-02627,1-02917,1-02918,1-03038,1-03191,1-01238,1-05420,1-05597	17	cg09615953,cg17328665,cg17724687,cg08926642,cg04767226,cg09168692,cg01605174,cg00019458
chr1	11714813	11714827	11714823	UAK42	1-04774	cg05796704,cg22697136,cg01420388,cg21515751,cg16077279	chr1:11713539-11715248	1-00423,1-00806,1-04774,1-11800,1-02918,1-06204,1-00894,1-03652,1-04071,1-02234,1-02260,1-06690,1-06988,1-04389,1-04460,1-03190	16	cg06848073,cg05796704,cg22697136,cg01420388,cg21515751,cg16077279,cg25752723,cg07426195,cg25430671,cg08202444,cg11245657,cg24664312,cg04290747,cg08587480
chr1	11863682	11863696	11863694	CTCF	1-02024	cg17514528,cg17745097,cg00581063,cg15861278,cg22059149,cg11544334,cg19180348	chr1:11862906-11865790	1-00508,1-04920,1-03298,1-03374,1-02024,1-06506,1-06537,1-04460,1-04466,1-07442,1-02234,1-05597	12	cg17514528,cg17745097,cg00581063,cg15861278,cg22059149,cg11544334,cg19180348,cg25730859,cg27058063,cg04727199,cg05228408,cg01226883,cg08869383,cg01134491
chr1	11863684	11863704	11863694	UAK42	1-02024	cg17514528,cg17745097,cg00581063,cg15861278,cg22059149,cg11544334,cg19180348	chr1:11862906-11865790	1-00508,1-04920,1-03298,1-03374,1-02024,1-06506,1-06537,1-04460,1-04466,1-07442,1-02234,1-05597	12	cg17514528,cg17745097,cg00581063,cg15861278,cg22059149,cg11544334,cg19180348,cg25730859,cg27058063,cg04727199,cg05228408,cg01226883,cg08869383,cg01134491
chr1	11863688	11863702	11863694	SP1	1-02024	cg17514528,cg17745097,cg00581063,cg15861278,cg22059149,cg11544334,cg19180348	chr1:11862906-11865790	1-00508,1-04920,1-03298,1-03374,1-02024,1-06506,1-06537,1-04460,1-04466,1-07442,1-02234,1-05597	12	cg17514528,cg17745097,cg00581063,cg15861278,cg22059149,cg11544334,cg19180348,cg25730859,cg27058063,cg04727199,cg05228408,cg01226883,cg08869383,cg01134491
chr1	17004776	17004791	17004789	B-Box	1-00041	cg00004209,cg14752068,cg13630980	chr1:17004191-17004835	1-00041,1-00112,1-00157,1-00389,1-00436,1-00982,1-05597	7	cg12435824,cg00004209,cg26835324,cg14752068,cg13630980,cg12442246,cg09158015
chr1	17199173	17199183	17199173	TEAD4	1-03538	cg23989737,cg12483946,cg08736522,cg24280512,cg11334694	chr1:17197623-17200164	1-04466,1-05597,1-00389,1-02841,1-02959,1-05946,1-04071,1-01553,1-07278,1-04512,1-05009,1-03275,1-03538,1-04113,1-01238,1-01805,1-04333	17	cg09861838,cg07564869,cg13178798,cg25976453,cg23989737,cg12483946,cg08736522,cg20168927,cg21692666,cg24280512,cg11334694,cg27528541,cg10011855
chr1	21044633	21044646	21044642	MYC	1-04523	cg05356564,cg18486150,cg05129477	chr1:21044030-21045424	1-05174,1-02959,1-04523	3	cg15613048,cg21184320,cg04123845,cg27137902,cg24661871,cg23677039,cg01694590,cg01054622,cg05356564,cg18486150,cg05129477,cg11890936
chr1	21044633	21044646	21044642	MYC	1-05174	cg05356564,cg18486150,cg05129477	chr1:21044030-21045424	1-05174,1-02959,1-04523	3	cg15613048,cg21184320,cg04123845,cg27137902,cg24661871,cg23677039,cg01694590,cg01054622,cg05356564,cg18486150,cg05129477,cg11890936
chr1	26232942	26232963	26232946	UAK18	1-04333	cg04471507,cg11709544,cg01811796,cg19362196	chr1:26232464-26234288	1-02544,1-00739,1-04655,1-04719,1-04865,1-05007,1-02786,1-02812,1-03190,1-00655,1-03393,1-05911,1-05977,1-06321,1-06370,1-00894,1-04333,1-07278,1-04624,1-00071	20	cg23079732,cg23236404,cg19400000,cg13793178,cg06216620,cg13378886,cg25059646,cg17342214,cg02386921,cg16183402,cg01168343,cg03210277,cg04471507,cg11709544,cg14076195,cg26314868,cg20685674,cg01811796,cg19362196,cg23323671,cg08134856,cg09518245,cg15707579
chr1	26611446	26611460	26611448	SP1	1-05999	cg00768487,cg25198007	chr1:26610756-26611454	1-05999,1-04537	2	cg05389935,cg00768487,cg25198007,cg24348240
chr1	27191616	27191630	27191618	UAK42	1-01017	cg14825555	chr1:27189269-27191068	1-00423,1-01017,1-02024	3	cg11348165,cg14333454,cg06720467,cg13466284,cg03421300,cg07786675,cg13374701,cg12583970,cg14825555,cg16558172
chr1	27677683	27677697	27677691	SP1	1-05443	cg04123310,cg01963906,cg12742432,cg07744618	chr1:27675586-27678016	1-00344,1-00400,1-05093,1-03472,1-04472,1-02331,1-04540,1-09064,1-00034,1-00174,1-00249,1-00304,1-00806,1-04915,1-05675,1-00808,1-00825,1-03840,1-01238,1-06506,1-04465,1-07555,1-04589,1-05443	24	cg21139713,cg02600983,cg08157684,cg01165781,cg01681396,cg03750567,cg00851518,cg04123310,cg01963906,cg12742432,cg07744618
chr1	27677708	27677722	27677718	ZNF143	1-02331	cg12742432,cg07744618	chr1:27675586-27678016	1-00344,1-00400,1-05093,1-03472,1-04472,1-02331,1-04540,1-09064,1-00034,1-00174,1-00249,1-00304,1-00806,1-04915,1-05675,1-00808,1-00825,1-03840,1-01238,1-06506,1-04465,1-07555,1-04589,1-05443	24	cg21139713,cg02600983,cg08157684,cg01165781,cg01681396,cg03750567,cg00851518,cg04123310,cg01963906,cg12742432,cg07744618
chr1	27677708	27677722	27677718	ZNF143	1-03840	cg12742432,cg07744618	chr1:27675586-27678016	1-00344,1-00400,1-05093,1-03472,1-04472,1-02331,1-04540,1-09064,1-00034,1-00174,1-00249,1-00304,1-00806,1-04915,1-05675,1-00808,1-00825,1-03840,1-01238,1-06506,1-04465,1-07555,1-04589,1-05443	24	cg21139713,cg02600983,cg08157684,cg01165781,cg01681396,cg03750567,cg00851518,cg04123310,cg01963906,cg12742432,cg07744618
chr1	36565753	36565770	36565754	CREB-ext	1-02987	cg18931815,cg15501865,cg20454443,cg04545015	chr1:36565180-36566534	1-00390,1-04655,1-04693,1-05093,1-02987,1-00625,1-05846,1-06401,1-04095,1-01242,1-04157,1-06506,1-06643,1-06690,1-05635	15	cg14601416,cg15818357,cg18931815,cg15501865,cg20454443,cg10997069,cg04545015,cg22380322,cg25851745
chr1	36565754	36565768	36565754	CTCF	1-02987	cg18931815,cg15501865,cg20454443,cg04545015	chr1:36565180-36566534	1-00390,1-04655,1-04693,1-05093,1-02987,1-00625,1-05846,1-06401,1-04095,1-01242,1-04157,1-06506,1-06643,1-06690,1-05635	15	cg14601416,cg15818357,cg18931815,cg15501865,cg20454443,cg10997069,cg04545015,cg22380322,cg25851745
chr1	36789358	36789372	36789369	CTCF	1-04865	cg13500072,cg04010586	chr1:36786614-36788628	1-00876,1-01049,1-06506,1-04380,1-04865,1-02959	6	cg12679760,cg02993069,cg11673291,cg17139085,cg23672278,cg22721579,cg13500072,cg04010586,cg14128890
chr1	39250394	39250408	39250396	v-JUN	1-00389	cg26113488,cg07958984,cg14667685,cg12410921	chr1:39249261-39249665	1-00080,1-00389,1-04692,1-04921,1-05379,1-02627,1-00625,1-03298,1-03374,1-05675,1-00874,1-00876,1-00894,1-03627,1-03652,1-06506,1-06643,1-06988,1-07386,1-05476	20	cg02680427,cg11391637,cg26113488,cg07958984,cg14667685,cg12410921
chr1	40782858	40782872	40782863	YY1	1-04512	cg06063903,cg18186394,cg12733396,cg04100190,cg01728173	chr1:40782457-40783793	1-04655,1-04782,1-04893,1-11800,1-01174,1-04112,1-01306,1-07004,1-04389,1-04512,1-04540,1-06248,1-01019,1-01553,1-02024,1-02264,1-06506,1-04460	18	cg03470396,cg00068503,cg24686358,cg26710722,cg26011014,cg14844588,cg23847109,cg06063903,cg18186394,cg12733396,cg04100190,cg01728173,cg10398407
chr1	41119882	41119897	41119895	UAK42	1-05570	cg16359657,cg02369542,cg16328007	chr1:41119282-41120825	1-00508,1-11800,1-05009,1-02900,1-02959,1-00625,1-02413,1-05570	8	cg03017091,cg16359657,cg02369542,cg16328007,cg11524422
chr1	41157599	41157618	41157612	E2F4	1-05570	cg15986668,cg26783428,cg13735974	chr1:41156519-41157964	1-00808,1-06506,1-05570	3	cg10843232,cg15986668,cg26783428,cg27386837,cg13735974,cg10336144,cg14796708,cg25039914,cg01414845,cg26720890,cg18127380,cg07807690,cg13073252,cg00622670,cg12364142,cg11107726,cg13730534,cg04732648,cg11523685,cg09022163
chr1	41157605	41157619	41157612	SP1	1-05570	cg15986668,cg26783428,cg13735974	chr1:41156519-41157964	1-00808,1-06506,1-05570	3	cg10843232,cg15986668,cg26783428,cg27386837,cg13735974,cg10336144,cg14796708,cg25039914,cg01414845,cg26720890,cg18127380,cg07807690,cg13073252,cg00622670,cg12364142,cg11107726,cg13730534,cg04732648,cg11523685,cg09022163
chr1	45187519	45187533	45187521	UAK46	1-01869	cg24527881,cg03320492,cg06884882	chr1:45187629-45187947	1-00150,1-01869,1-04466	3	cg24527881,cg20079129,cg03320492,cg06884882
chr1	50489591	50489617	50489605	E2F4	1-03652	cg16260421,cg18540492,cg20931033,cg21834207	chr1:50489239-50490146	1-00739,1-04655,1-02544,1-02959,1-03652,1-01306,1-05570	7	cg12127196,cg16260421,cg18540492,cg14615336,cg07913294,cg20931033,cg05759718,cg03732087,cg26682094,cg03217897,cg05387519,cg13424673,cg26249046,cg21834207,cg07520029
chr1	50489595	50489613	50489605	E2F1	1-03652	cg16260421,cg18540492,cg20931033,cg21834207	chr1:50489239-50490146	1-00739,1-04655,1-02544,1-02959,1-03652,1-01306,1-05570	7	cg12127196,cg16260421,cg18540492,cg14615336,cg07913294,cg20931033,cg05759718,cg03732087,cg26682094,cg03217897,cg05387519,cg13424673,cg26249046,cg21834207,cg07520029
chr1	65775199	65775224	65775210	UAK42	1-00914	cg12751142,cg06864398,cg25503513,cg20506944	chr1:65774563-65775528	1-00808,1-00914,1-01306	3	cg12751142,cg06864398,cg25503513,cg21683284,cg06346974,cg20968142,cg27062038,cg07996785,cg01920657,cg02457097,cg18271025
chr1	65775204	65775223	65775210	E2F4	1-00914	cg12751142,cg06864398,cg25503513,cg20506944	chr1:65774563-65775528	1-00808,1-00914,1-01306	3	cg12751142,cg06864398,cg25503513,cg21683284,cg06346974,cg20968142,cg27062038,cg07996785,cg01920657,cg02457097,cg18271025
chr1	90098780	90098799	90098798	E2F4	1-01984	cg04291124,cg18489923,cg22473125,cg14254720	chr1:90097603-90098705	1-01242,1-01984,1-02491	3	cg06641366,cg04291124,cg18489923,cg22473125,cg14254720,cg21541030,cg12711743,cg06353330,cg18312997
chr1	110282986	110282999	110282998	MYC	1-04719	cg08525331,cg02880629,cg04545003	chr1:110282273-110283343	1-04056,1-01260,1-04719	3	cg10807101,cg23645476,cg00297950,cg09152047,cg11913652,cg15967012,cg04903060,cg25027501,cg08525331,cg02880629,cg04545003
chr1	110282987	110283010	110282998	E2F1	1-04719	cg08525331,cg02880629,cg04545003	chr1:110282273-110283343	1-04056,1-01260,1-04719	3	cg10807101,cg23645476,cg00297950,cg09152047,cg11913652,cg15967012,cg04903060,cg25027501,cg08525331,cg02880629,cg04545003
chr1	110282990	110283007	110282998	NRF1	1-04719	cg08525331,cg02880629,cg04545003	chr1:110282273-110283343	1-04056,1-01260,1-04719	3	cg10807101,cg23645476,cg00297950,cg09152047,cg11913652,cg15967012,cg04903060,cg25027501,cg08525331,cg02880629,cg04545003
chr1	118727917	118727938	118727937	EGR1	1-01313	cg02623200,cg23257935,cg00830087,cg03850057,cg26100099,cg16240368,cg09497789	chr1:118727657-118728811	1-01313	1	cg02623200,cg23257935,cg02152120,cg00310968,cg01105494,cg00830087,cg03850057,cg26100099,cg16240368,cg09497789,cg05808356
chr1	118727931	118727948	118727937	UAK45	1-01313	cg02623200,cg23257935,cg00830087,cg03850057,cg26100099,cg16240368,cg09497789	chr1:118727657-118728811	1-01313	1	cg02623200,cg23257935,cg02152120,cg00310968,cg01105494,cg00830087,cg03850057,cg26100099,cg16240368,cg09497789,cg05808356
chr1	145382833	145382853	145382853	UAK41	1-05174	cg25600478,cg19825787,cg14448451,cg11538389	chr1:145382339-145382964	1-05174,1-02786,1-02963,1-03190,1-03191,1-00543,1-03258,1-03275,1-03374,1-05888,1-00808,1-03676,1-01045,1-04056,1-04389,1-04460,1-07084,1-04588	18	cg23685870,cg25600478,cg19825787,cg14448451,cg11538389,cg10816943,cg07117663
chr1	145382843	145382857	145382853	CTCF-ext	1-05174	cg25600478,cg19825787,cg14448451,cg11538389	chr1:145382339-145382964	1-05174,1-02786,1-02963,1-03190,1-03191,1-00543,1-03258,1-03275,1-03374,1-05888,1-00808,1-03676,1-01045,1-04056,1-04389,1-04460,1-07084,1-04588	18	cg23685870,cg25600478,cg19825787,cg14448451,cg11538389,cg10816943,cg07117663
chr1	147825735	147825750	147825736	B-Box	1-01869	cg13502125,cg06216408,cg19639898	chr1:147825749-147826961	1-01869,1-00508,1-02544,1-00625,1-03846,1-04232,1-07593	7	cg15818208,cg13502125,cg06216408,cg19639898,cg12099459,cg10486098
chr1	150849400	150849414	150849408	RXRA	1-01017	cg12912293,cg13357341,cg17166434	chr1:150849148-150850381	1-01017	1	cg06523891,cg05806577,cg13386712,cg26228696,cg19889444,cg14371027,cg11594892,cg25476575,cg27572661,cg12912293,cg13357341,cg17166434,cg17942553
chr1	151103744	151103765	151103751	EGR1	1-05476	cg23010096,cg07371589	chr1:151103641-151106378	1-04719,1-05009,1-05093,1-02900,1-02918,1-03190,1-00655,1-05911,1-01553,1-07026,1-04460,1-02413,1-07278,1-02959,1-01049,1-03846,1-01242,1-05420,1-05476,1-00517,1-11800,1-05379,1-02627,1-05977,1-03627,1-01053,1-01384,1-04472	28	cg07119434,cg19706516,cg16399136,cg04065086,cg23010096,cg04736556,cg07371589,cg09143801,cg01990592,cg25583253,cg15336312,cg23280536,cg01159236
chr1	151170876	151170890	151170890	E2F1	1-02959	cg24720336,cg04317700,cg08623888	chr1:151170305-151171406	1-02959	1	cg13357249,cg24720336,cg04317700,cg12124731,cg08623888,cg11206482,cg22802720,cg09166705,cg17859048,cg08636040,cg08922811,cg06936779
chr1	154841051	154841065	154841063	PU1	1-00423	cg03003668,cg19894091,cg01963297	chr1:154839812-154840890	1-00423,1-00797,1-04855,1-02959,1-00655,1-03627,1-01577,1-01984,1-04299,1-04389,1-07386,1-05570,1-00801,1-02917,1-00625,1-06506	16	cg06221963,cg09359103,cg16680214,cg03003668
chr1	158979607	158979621	158979620	STAT1	1-00652	cg21406461,cg23061876,cg12647478,cg07463059	chr1:158978811-158979811	1-00652,1-02411	2	cg04805131,cg21406461,cg23061876,cg12647478,cg01342196,cg17601658,cg07463059
chr1	159915610	159915625	159915620	PAX5	1-04920	cg11077026,cg07175301,cg19111262	chr1:159915373-159916473	1-04920,1-02874,1-03627,1-02491	4	cg17720231,cg02985724,cg02994162,cg11077026,cg07175301,cg09765302,cg19111262,cg19354656
chr1	169075546	169075560	169075560	NRF1	1-04920	cg27127171	chr1:169076075-169077066	1-00041,1-04920,1-03422,1-01256,1-02260,1-04252,1-06537,1-06690	8	cg12236822,cg16747659,cg17789859,cg17818559
chr1	196866746	196866760	196866759	CTCF	1-04540	cg20784841,cg15100757,cg10627839	chr1:196865685-196866513	1-00702,1-04865,1-04870,1-04920,1-06370,1-03842,1-04540	7	cg23673761,cg20784841,cg15100757,cg10627839
chr1	201619295	201619309	201619295	E2F1	1-04893	cg07599786	chr1:201617041-201619901	1-04774,1-05009,1-01306,1-06988,1-00390,1-05174,1-05977,1-01053,1-01553,1-07026,1-04589,1-04893,1-04926,1-03224,1-05926,1-00808,1-03897,1-03991,1-04056,1-02260,1-00423,1-05093,1-05999,1-00150,1-00508,1-02544,1-05613	27	cg25167447,cg12468255,cg15795962,cg12417362,cg13071729,cg14834267,cg16517702,cg09358973,cg14920846,cg19827875,cg07599786,cg04179952,cg04287574,cg08883485,cg03400139
chr1	220102327	220102340	220102337	HNF4	1-05613	cg04647768	chr1:220101367-220102529	1-04655,1-02959,1-06506,1-07419,1-05597,1-05613,1-04389	7	cg26685195,cg14848594,cg17721710,cg24396691,cg24933645,cg10325600,cg23815582,cg25317664,cg14235398,cg12355180,cg25638859,cg25841634,cg27295373,cg04647768,cg19313402,cg21648401,cg02557906,cg07905105
chr1	228463765	228463779	228463774	ZNF263	1-01238	cg10220895,cg04850211,cg05844789	chr1:228463719-228464797	1-00423,1-04926,1-05360,1-03224,1-05888,1-03472,1-01238,1-06506,1-07278	9	cg14661383,cg03141069,cg10220895,cg04850211,cg05844789,cg09037426
chr1	228463769	228463783	228463774	UAK42	1-01238	cg10220895,cg04850211,cg05844789	chr1:228463719-228464797	1-00423,1-04926,1-05360,1-03224,1-05888,1-03472,1-01238,1-06506,1-07278	9	cg14661383,cg03141069,cg10220895,cg04850211,cg05844789,cg09037426
chr1	228463773	228463787	228463774	SP1	1-01238	cg10220895,cg04850211,cg05844789	chr1:228463719-228464797	1-00423,1-04926,1-05360,1-03224,1-05888,1-03472,1-01238,1-06506,1-07278	9	cg14661383,cg03141069,cg10220895,cg04850211,cg05844789,cg09037426
chr1	228463774	228463793	228463774	E2F4	1-01238	cg10220895,cg04850211,cg05844789	chr1:228463719-228464797	1-00423,1-04926,1-05360,1-03224,1-05888,1-03472,1-01238,1-06506,1-07278	9	cg14661383,cg03141069,cg10220895,cg04850211,cg05844789,cg09037426
chr1	228652506	228652520	228652511	NRF1	1-00825	cg07101354,cg20411935,cg10536423	chr1:228652337-228653490	1-01049,1-06506,1-02413,1-00825,1-03422	5	cg03041738,cg26911220,cg07726139,cg13799227,cg07101354,cg20411935,cg23239574,cg10536423,cg17994960
chr1	236687218	236687237	236687232	E2F4	1-05360	cg14445518,cg03796549,cg06558640,cg16400094	chr1:236685848-236687802	1-00041,1-00249,1-00319,1-00347,1-04774,1-05360,1-02959,1-03059,1-00655,1-03224,1-03258,1-06321,1-00808,1-00832,1-00874,1-00894,1-01017,1-03665,1-03840,1-03842,1-06506,1-06643,1-06690,1-04400,1-04466,1-02491,1-04588,1-04589,1-04624,1-09064	30	cg18191270,cg03989567,cg19176897,cg01030476,cg18322510,cg25041207,cg09334514,cg14760424,cg14445518,cg08137948,cg03796549,cg06558640,cg16400094,cg13444964,cg24846594,cg09823395,cg20719069,cg06676847,cg13948413,cg24492862
chr1	236687227	236687241	236687232	PU1	1-05360	cg14445518,cg03796549,cg06558640,cg16400094	chr1:236685848-236687802	1-00041,1-00249,1-00319,1-00347,1-04774,1-05360,1-02959,1-03059,1-00655,1-03224,1-03258,1-06321,1-00808,1-00832,1-00874,1-00894,1-01017,1-03665,1-03840,1-03842,1-06506,1-06643,1-06690,1-04400,1-04466,1-02491,1-04588,1-04589,1-04624,1-09064	30	cg18191270,cg03989567,cg19176897,cg01030476,cg18322510,cg25041207,cg09334514,cg14760424,cg14445518,cg08137948,cg03796549,cg06558640,cg16400094,cg13444964,cg24846594,cg09823395,cg20719069,cg06676847,cg13948413,cg24492862
chr10	18689624	18689638	18689624	UAK42	1-04512	cg25334928,cg25327888,cg12289251,cg16108246,cg14839147,cg05720640	chr10:18688586-18689949	1-00157,1-05153,1-03059,1-03258,1-05999,1-03538,1-03846,1-01238,1-02283,1-02413,1-04512,1-04624,1-04692,1-03639,1-03897,1-04157,1-06537,1-04389,1-05613	19	cg08550689,cg03587042,cg18243536,cg07262635,cg25334928,cg25327888,cg12289251,cg24128066,cg16108246,cg14839147,cg05351658,cg05720640
chr10	19777934	19777955	19777937	EGR1	1-04855	cg17321329,cg16440591,cg17177536	chr10:19777253-19778009	1-00197,1-04655,1-04855,1-04865,1-04920,1-05093,1-02926,1-02959,1-05926,1-03652,1-03842,1-03846,1-03894,1-01306,1-01869,1-02290,1-06690,1-04523,1-04624,1-09064,1-05476,1-05597	22	cg04173359,cg17321329,cg05650586,cg27014732,cg16440591,cg17177536
chr10	19777936	19777950	19777937	ZNF143	1-04855	cg17321329,cg16440591,cg17177536	chr10:19777253-19778009	1-00197,1-04655,1-04855,1-04865,1-04920,1-05093,1-02926,1-02959,1-05926,1-03652,1-03842,1-03846,1-03894,1-01306,1-01869,1-02290,1-06690,1-04523,1-04624,1-09064,1-05476,1-05597	22	cg04173359,cg17321329,cg05650586,cg27014732,cg16440591,cg17177536
chr10	45360512	45360531	45360519	E2F4	1-07593	cg06188367,cg24969520,cg03444077,cg10160939	chr10:45359610-45360970	1-04782,1-03159,1-05888,1-05946,1-06321,1-00894,1-03627,1-01049,1-06506,1-07593,1-03224	11	cg06188367,cg24969520,cg03444077,cg11258001,cg03440631,cg20224693,cg03865524,cg10160939,cg15331834
chr10	45360519	45360539	45360519	ZNF143-ext	1-07593	cg06188367,cg24969520,cg03444077,cg10160939	chr10:45359610-45360970	1-04782,1-03159,1-05888,1-05946,1-06321,1-00894,1-03627,1-01049,1-06506,1-07593,1-03224	11	cg06188367,cg24969520,cg03444077,cg11258001,cg03440631,cg20224693,cg03865524,cg10160939,cg15331834
chr10	45720090	45720104	45720095	NFY	1-07593	cg17554636,cg20447730,cg01782066	chr10:45719750-45720135	1-00071,1-00174,1-03038,1-05911,1-01218,1-04112,1-04367,1-07593,1-04624,1-09064	10	cg17554636,cg20447730,cg01782066,cg23771956,cg04392266
chr10	71906456	71906470	71906465	NRF1	1-03996	cg18840567,cg05064937,cg11035800	chr10:71905956-71907489	1-00174,1-00319,1-00347,1-05360,1-03652,1-03996,1-04157	7	cg00377169,cg09483247,cg18815006,cg10979742,cg12463100,cg27249304,cg23328778,cg25086512,cg18840567,cg05064937,cg11035800,cg04439776,cg25303070
chr10	71906461	71906474	71906465	AP1	1-03996	cg18840567,cg05064937,cg11035800	chr10:71905956-71907489	1-00174,1-00319,1-00347,1-05360,1-03652,1-03996,1-04157	7	cg00377169,cg09483247,cg18815006,cg10979742,cg12463100,cg27249304,cg23328778,cg25086512,cg18840567,cg05064937,cg11035800,cg04439776,cg25303070
chr10	72648332	72648349	72648343	E2F1	1-02812	cg25363622,cg18079653,cg21324555,cg19225512	chr10:72647937-72649009	1-04652,1-02812,1-03059,1-03191,1-03374	5	cg25757740,cg18049105,cg07409741,cg23296392,cg07131093,cg26782013,cg25363622,cg18079653,cg21324555,cg19225512,cg12496800,cg04828926
chr10	72648335	72648354	72648343	E2F4	1-02812	cg25363622,cg18079653,cg21324555,cg19225512	chr10:72647937-72649009	1-04652,1-02812,1-03059,1-03191,1-03374	5	cg25757740,cg18049105,cg07409741,cg23296392,cg07131093,cg26782013,cg25363622,cg18079653,cg21324555,cg19225512,cg12496800,cg04828926
chr10	72648337	72648351	72648343	NRF1	1-02812	cg25363622,cg18079653,cg21324555,cg19225512	chr10:72647937-72649009	1-04652,1-02812,1-03059,1-03191,1-03374	5	cg25757740,cg18049105,cg07409741,cg23296392,cg07131093,cg26782013,cg25363622,cg18079653,cg21324555,cg19225512,cg12496800,cg04828926
chr10	73136955	73136969	73136957	NFIC	1-07026	cg25577648,cg24487372,cg05092932	chr10:73136912-73137352	1-00389,1-05124,1-02812,1-02544,1-03038,1-03059,1-00543,1-00625,1-06321,1-00894,1-03639,1-04095,1-01238,1-01869,1-02264,1-04190,1-07026,1-04299,1-02491	19	cg11061422,cg06441362,cg25577648,cg24487372,cg05092932
chr10	73137230	73137240	73137238	UAK26	1-03038	cg24487372,cg05092932	chr10:73136912-73137352	1-00389,1-05124,1-02812,1-02544,1-03038,1-03059,1-00543,1-00625,1-06321,1-00894,1-03639,1-04095,1-01238,1-01869,1-02264,1-04190,1-07026,1-04299,1-02491	19	cg11061422,cg06441362,cg25577648,cg24487372,cg05092932
chr10	73137237	73137247	73137238	UAK57	1-03038	cg24487372,cg05092932	chr10:73136912-73137352	1-00389,1-05124,1-02812,1-02544,1-03038,1-03059,1-00543,1-00625,1-06321,1-00894,1-03639,1-04095,1-01238,1-01869,1-02264,1-04190,1-07026,1-04299,1-02491	19	cg11061422,cg06441362,cg25577648,cg24487372,cg05092932
chr10	73565688	73565702	73565695	NFY	1-07593	cg17485681,cg08293528,cg17641566	chr10:73565439-73565967	1-00423,1-00508,1-02918,1-06506,1-06988,1-04389,1-02413,1-07593	8	cg09229668,cg17485681,cg08293528,cg23983208,cg17641566
chr10	77165264	77165283	77165275	UAK42	1-04506	cg12864721,cg23657179,cg15182635,cg00082939,cg01107874,cg19057830	chr10:77164226-77167092	1-03159,1-03190,1-01053,1-04506,1-02413,1-07593,1-00034,1-04865,1-11800,1-02544,1-02959,1-05675,1-05726,1-05888,1-01075,1-03991,1-04056,1-02234,1-06506,1-04389,1-04460,1-04472,1-07419,1-05420,1-05613,1-06690	26	cg03958038,cg19633908,cg03936104,cg12864721,cg23657179,cg15182635,cg00082939,cg01107874,cg19057830,cg10642548,cg24677093,cg15488978,cg13342844,cg05330121,cg26744079
chr10	81965474	81965488	81965479	CTCF	1-02234	cg05566498	chr10:81964267-81965172	1-00319,1-04719,1-02959,1-03627,1-02097,1-02234,1-04270,1-04460,1-04472,1-07551	10	cg16745444,cg03483709,cg16466154,cg03876258,cg03359508,cg14862378
chr10	82295776	82295793	82295779	CREB-ext	1-00150	cg08506606,cg24440658,cg15642854	chr10:82295501-82296441	1-00071,1-00150,1-04782,1-04870,1-05675,1-05946,1-00825,1-03652,1-03991,1-01869,1-06506,1-06690,1-04333,1-04512,1-04624	15	cg08506606,cg24440658,cg15642854,cg09623377,cg22874264
chr10	82295776	82295793	82295779	CREB-ext	1-03991	cg08506606,cg24440658,cg15642854,cg09623377,cg22874264	chr10:82295501-82296441	1-00071,1-00150,1-04782,1-04870,1-05675,1-05946,1-00825,1-03652,1-03991,1-01869,1-06506,1-06690,1-04333,1-04512,1-04624	15	cg08506606,cg24440658,cg15642854,cg09623377,cg22874264
chr10	82295777	82295791	82295779	CTCF	1-00150	cg08506606,cg24440658,cg15642854	chr10:82295501-82296441	1-00071,1-00150,1-04782,1-04870,1-05675,1-05946,1-00825,1-03652,1-03991,1-01869,1-06506,1-06690,1-04333,1-04512,1-04624	15	cg08506606,cg24440658,cg15642854,cg09623377,cg22874264
chr10	82295777	82295791	82295779	CTCF	1-03991	cg08506606,cg24440658,cg15642854,cg09623377,cg22874264	chr10:82295501-82296441	1-00071,1-00150,1-04782,1-04870,1-05675,1-05946,1-00825,1-03652,1-03991,1-01869,1-06506,1-06690,1-04333,1-04512,1-04624	15	cg08506606,cg24440658,cg15642854,cg09623377,cg22874264
chr10	82295779	82295799	82295779	UAK25	1-00150	cg08506606,cg24440658,cg15642854	chr10:82295501-82296441	1-00071,1-00150,1-04782,1-04870,1-05675,1-05946,1-00825,1-03652,1-03991,1-01869,1-06506,1-06690,1-04333,1-04512,1-04624	15	cg08506606,cg24440658,cg15642854,cg09623377,cg22874264
chr10	82295779	82295799	82295779	UAK25	1-03991	cg08506606,cg24440658,cg15642854,cg09623377,cg22874264	chr10:82295501-82296441	1-00071,1-00150,1-04782,1-04870,1-05675,1-05946,1-00825,1-03652,1-03991,1-01869,1-06506,1-06690,1-04333,1-04512,1-04624	15	cg08506606,cg24440658,cg15642854,cg09623377,cg22874264
chr10	93392851	93392860	93392851	GATA1	1-05673	cg26667395,cg20475550,cg18644675,cg12486537,cg26448681,cg19902394,cg06051961	chr10:93391962-93393510	1-07551,1-05007,1-05673,1-06506	4	cg20114113,cg26667395,cg23909584,cg20475550,cg00197495,cg09775312,cg07640747,cg18644675,cg12486537,cg26448681,cg19902394,cg06051961,cg00830735,cg04839761,cg10974128
chr10	94820187	94820201	94820191	CTCF	1-06690	cg26404725,cg01416891,cg05219493,cg17743250,cg25083618,cg20322977	chr10:94819558-94821774	1-02918,1-02959,1-03190,1-05675,1-06204,1-03472,1-01053,1-01306,1-02183,1-02260,1-04252,1-04389,1-04460,1-04624,1-00034,1-04893,1-04926,1-02900,1-00625,1-03534,1-00876,1-03627,1-03639,1-03897,1-04112,1-06690,1-02413	27	cg09233204,cg07204602,cg26404725,cg09440270,cg16577651,cg07225966,cg01416891,cg05219493,cg17743250,cg25083618,cg20322977,cg19305681,cg05193369
chr10	97849989	97850006	97849992	CREB-ext	1-00761	cg15619641,cg14802772,cg10938586,cg02346447,cg11563399,cg07202981	chr10:97849480-97850400	1-00761,1-05174,1-00645,1-03394,1-03676,1-01869	6	cg15619641,cg14802772,cg10938586,cg02346447,cg11563399,cg07202981,cg22792461,cg01207600,cg20235036
chr10	97849992	97850002	97849992	UAK35	1-00761	cg15619641,cg14802772,cg10938586,cg02346447,cg11563399,cg07202981	chr10:97849480-97850400	1-00761,1-05174,1-00645,1-03394,1-03676,1-01869	6	cg15619641,cg14802772,cg10938586,cg02346447,cg11563399,cg07202981,cg22792461,cg01207600,cg20235036
chr10	97849992	97850012	97849992	UAK17	1-00761	cg15619641,cg14802772,cg10938586,cg02346447,cg11563399,cg07202981	chr10:97849480-97850400	1-00761,1-05174,1-00645,1-03394,1-03676,1-01869	6	cg15619641,cg14802772,cg10938586,cg02346447,cg11563399,cg07202981,cg22792461,cg01207600,cg20235036
chr10	97889729	97889743	97889736	PU1	1-02411	cg27073607,cg08374732	chr10:97888502-97889449	1-01017,1-02411	2	cg19405834,cg27073607,cg08374732,cg01742268,cg16289751,cg12632264,cg06658147,cg21930583,cg17303833
chr10	105428518	105428539	105428530	EGR1	1-04911	cg00492979,cg18735015,cg16669339,cg19726408,cg20669641	chr10:105428384-105428819	1-04865,1-04911,1-05379,1-02918,1-03374,1-00808,1-03538,1-00913,1-03639,1-01218,1-04112,1-01869,1-06506,1-04389,1-02425,1-04589	16	cg00492979,cg18735015,cg16669339,cg19726408,cg20669641
chr10	105428525	105428535	105428530	UAK35	1-04911	cg00492979,cg18735015,cg16669339,cg19726408,cg20669641	chr10:105428384-105428819	1-04865,1-04911,1-05379,1-02918,1-03374,1-00808,1-03538,1-00913,1-03639,1-01218,1-04112,1-01869,1-06506,1-04389,1-02425,1-04589	16	cg00492979,cg18735015,cg16669339,cg19726408,cg20669641
chr10	116391867	116391888	116391868	EGR1	1-11800	cg15294435,cg01315572,cg12736146,cg08587685	chr10:116391466-116392934	1-04865,1-04920,1-11800,1-01238,1-06506,1-04466,1-04588,1-05570	8	cg15294435,cg01315572,cg12736146,cg18680346,cg10680376,cg20218110,cg10832998,cg19936380,cg25722735,cg08587685,cg02068171,cg27290215
chr10	116581377	116581398	116581379	EGR1	1-04624	cg12417938,cg00177239,cg07216976	chr10:116580880-116581830	1-05675,1-02234,1-04624	3	cg12417938,cg00177239,cg08206898,cg07216976,cg25645310,cg25209674,cg04858230,cg11243835,cg03682117
chr10	124639143	124639160	124639147	NRF1	1-04056	cg11218091,cg11216554,cg14708218,cg18195080,cg19634157,cg20072242	chr10:124638199-124639986	1-00157,1-05009,1-02900,1-02544,1-00543,1-03393,1-00808,1-03578,1-00894,1-00982,1-03676,1-01075,1-03825,1-04056,1-01260,1-04190,1-06690,1-02413	18	cg17837712,cg03804621,cg11218091,cg11216554,cg14708218,cg18195080,cg15252215,cg12474023,cg19634157,cg09019052,cg20072242,cg12346673,cg22704326,cg10241347,cg09533473,cg11729970,cg08779706,cg26652702
chr10	124639522	124639537	124639536	PAX5	1-05009	cg03804621,cg11216554,cg19634157,cg10241347	chr10:124638199-124639986	1-00157,1-05009,1-02900,1-02544,1-00543,1-03393,1-00808,1-03578,1-00894,1-00982,1-03676,1-01075,1-03825,1-04056,1-01260,1-04190,1-06690,1-02413	18	cg17837712,cg03804621,cg11218091,cg11216554,cg14708218,cg18195080,cg15252215,cg12474023,cg19634157,cg09019052,cg20072242,cg12346673,cg22704326,cg10241347,cg09533473,cg11729970,cg08779706,cg26652702
chr10	134938414	134938428	134938421	CTCF	1-02959	cg01120434,cg24898738,cg14003931	chr10:134935941-134938470	1-04782,1-02769,1-04460,1-06506,1-00801,1-02959,1-03894	7	cg24333420,cg07304315,cg03659281,cg13851375,cg01120434,cg04876028,cg24898738,cg14003931
chr10	134938416	134938436	134938421	UAK25	1-02959	cg01120434,cg24898738,cg14003931	chr10:134935941-134938470	1-04782,1-02769,1-04460,1-06506,1-00801,1-02959,1-03894	7	cg24333420,cg07304315,cg03659281,cg13851375,cg01120434,cg04876028,cg24898738,cg14003931
chr10	135059922	135059932	135059928	USF	1-03258	cg04411086,cg07787666,cg26465389,cg03287432,cg25154244	chr10:135059164-135061441	1-01242,1-03258,1-04400	3	cg04411086,cg07787666,cg15656462,cg19021988,cg26465389,cg03287432,cg25154244,cg23400579,cg11164162,cg19348206,cg05468584,cg09763180,cg14674124,cg13169484,cg13182610
chr10	135060619	135060633	135060622	UAK42	1-04400	cg26465389,cg03287432,cg25154244,cg09763180	chr10:135059164-135061441	1-01242,1-03258,1-04400	3	cg04411086,cg07787666,cg15656462,cg19021988,cg26465389,cg03287432,cg25154244,cg23400579,cg11164162,cg19348206,cg05468584,cg09763180,cg14674124,cg13169484,cg13182610
chr10	135192543	135192562	135192559	E2F4	1-01384	cg06270799,cg07511014,cg26915536,cg26188501	chr10:135190859-135192233	1-04870,1-05009,1-03001,1-01049,1-04095,1-01306,1-01384,1-01989,1-06506,1-02411	10	cg24819967,cg17833184,cg12428399,cg25214584,cg20534287,cg14353649,cg06270799,cg07511014,cg26915536,cg26188501,cg16497424,cg27503573,cg17819963,cg05954989,cg13224723,cg14846060,cg17465130,cg20533711,cg13446658,cg11975206,cg23639399,cg05295236,cg02251172,cg19601447,cg02578740
chr10	135192543	135192562	135192559	E2F4	1-04095	cg06270799,cg07511014,cg26915536,cg26188501	chr10:135190859-135192233	1-04870,1-05009,1-03001,1-01049,1-04095,1-01306,1-01384,1-01989,1-06506,1-02411	10	cg24819967,cg17833184,cg12428399,cg25214584,cg20534287,cg14353649,cg06270799,cg07511014,cg26915536,cg26188501,cg16497424,cg27503573,cg17819963,cg05954989,cg13224723,cg14846060,cg17465130,cg20533711,cg13446658,cg11975206,cg23639399,cg05295236,cg02251172,cg19601447,cg02578740
chr10	135379097	135379111	135379100	CTCF	1-04865	cg14239307,cg16208053,cg16266492	chr10:135378569-135379755	1-00157,1-00517,1-04865,1-04926,1-02917,1-03038,1-03275,1-03393,1-05673,1-00825,1-03538,1-00894,1-01017,1-03627,1-01049,1-03825,1-03894,1-04112,1-02241,1-06506,1-02413,1-05597,1-05635,1-02411	24	cg24678803,cg27334444,cg14239307,cg16208053,cg20087519,cg04981000,cg16266492,cg16654419,cg05646491
chr11	442067	442081	442078	UAK42	1-00112	cg18993457,cg04021962,cg19598514,cg20132549,cg18889092	chr11:441982-442754	1-00112,1-06506	2	cg18993457,cg04021962,cg05904366,cg24932241,cg19598514,cg20132549,cg18889092,cg08200582,cg09413853
chr11	1785438	1785452	1785447	UA3	1-02411	cg22079043,cg15017982,cg14250138	chr11:1784979-1785805	1-00304,1-02874,1-03298,1-03374,1-04095,1-06643,1-07026,1-04465,1-04466,1-02411,1-07419,1-07442,1-05443	13	cg04984200,cg07343429,cg05003455,cg27072332,cg03058187,cg13308525,cg16977799,cg04546747,cg22079043,cg15232290,cg12007048,cg15017982,cg14250138
chr11	2291813	2291827	2291813	NRF1	1-03665	cg01156550	chr11:2291259-2293666	1-06506,1-00046,1-00423,1-00508,1-00517,1-00806,1-04719,1-04901,1-05174,1-05379,1-02918,1-02926,1-02959,1-00808,1-01553,1-02097,1-02183,1-04203,1-06988,1-04389,1-02413,1-07555,1-04537,1-00436,1-02769,1-03059,1-03190,1-03393,1-05999,1-06204,1-00876,1-03665,1-07026,1-07419,1-07442,1-05570,1-05946,1-04112,1-02024,1-06537	40	cg11373604,cg11419064,cg09894698,cg18485844,cg22346124,cg10290276,cg13930892,cg06263495,cg21365566,cg02964724,cg27252164,cg20912770,cg05309948,cg19459876,cg15790820,cg06272038,cg10526374,cg11772171,cg13330341,cg06347739,cg14308479,cg07333715,cg01156550,cg21063716,cg03306615,cg19284039,cg26051413,cg13762320,cg11644479,cg24353535,cg05068202,cg20392764,cg07525299,cg12499235,cg24057514,cg06623151,cg0…
chr11	2722073	2722090	2722085	CREB-ext	1-03846	cg06288089	chr11:2721242-2722714	1-02874,1-02926,1-03258,1-01017,1-01075,1-03846,1-01869,1-07004,1-02425,1-04270	10	cg12077660,cg03401726,cg16739686,cg08359167,cg08446215,cg26104781,cg02219360,cg07595203,cg09518720,cg14958441,cg27323091,cg01873334,cg05816130,cg14243741,cg05740879,cg01893176,cg11666921,cg26094482,cg03422070,cg15651941,cg25306939,cg06288089,cg02798157,cg01744331,cg16556677,cg26963277,cg11272547,cg03654058,cg23906872,cg06809295,cg04762676
chr11	2722074	2722095	2722085	E2F1	1-03846	cg06288089	chr11:2721242-2722714	1-02874,1-02926,1-03258,1-01017,1-01075,1-03846,1-01869,1-07004,1-02425,1-04270	10	cg12077660,cg03401726,cg16739686,cg08359167,cg08446215,cg26104781,cg02219360,cg07595203,cg09518720,cg14958441,cg27323091,cg01873334,cg05816130,cg14243741,cg05740879,cg01893176,cg11666921,cg26094482,cg03422070,cg15651941,cg25306939,cg06288089,cg02798157,cg01744331,cg16556677,cg26963277,cg11272547,cg03654058,cg23906872,cg06809295,cg04762676
chr11	5959245	5959259	5959258	YY1	1-00625	cg24799795,cg14980045,cg13902645,cg05234568,cg25319279	chr11:5958988-5960214	1-00797,1-04921,1-02627,1-02841,1-00625,1-00894,1-05597,1-05009,1-03191,1-03393,1-05926,1-05977,1-00874,1-00982,1-03627,1-03665,1-01053,1-01306,1-06506,1-02411	20	cg07618045,cg04704495,cg24799795,cg14980045,cg13902645,cg05234568,cg25319279,cg03094675
chr11	32448910	32448923	32448920	MYC	1-02324	cg12006284	chr11:32447943-32452840	1-04920,1-00894,1-01869,1-07033,1-02413,1-02425,1-04523,1-00739,1-05093,1-00625,1-03275,1-05946,1-05999,1-06401,1-03422,1-00914,1-03676,1-04071,1-04095,1-01577,1-06988,1-04270,1-04506,1-07419,1-04537,1-05443,1-00157,1-00389,1-11800,1-05009,1-02627,1-02652,1-02959,1-05888,1-06204,1-01174,1-04389,1-05420,1-04865,1-02874,1-03038,1-03190,1-00541,1-00982,1-01553,1-06506,1-05726,1-01306,1-04512,1-00854…	51	cg09695430,cg20204986,cg13638420,cg25094569,cg13301003,cg04096767,cg12006284,cg24106790,cg12982322,cg16501028,cg04456238,cg13540960,cg05222924,cg06516124,cg25782229,cg20989480,cg08787968,cg12781568,cg01693350,cg15518358,cg15446391,cg00142072,cg19211915,cg09234616,cg13641903,cg22533573,cg15315385
chr11	32448910	32448923	32448920	MYC	1-04389	cg13301003,cg12982322	chr11:32447943-32452840	1-04920,1-00894,1-01869,1-07033,1-02413,1-02425,1-04523,1-00739,1-05093,1-00625,1-03275,1-05946,1-05999,1-06401,1-03422,1-00914,1-03676,1-04071,1-04095,1-01577,1-06988,1-04270,1-04506,1-07419,1-04537,1-05443,1-00157,1-00389,1-11800,1-05009,1-02627,1-02652,1-02959,1-05888,1-06204,1-01174,1-04389,1-05420,1-04865,1-02874,1-03038,1-03190,1-00541,1-00982,1-01553,1-06506,1-05726,1-01306,1-04512,1-00854…	51	cg09695430,cg20204986,cg13638420,cg25094569,cg13301003,cg04096767,cg12006284,cg24106790,cg12982322,cg16501028,cg04456238,cg13540960,cg05222924,cg06516124,cg25782229,cg20989480,cg08787968,cg12781568,cg01693350,cg15518358,cg15446391,cg00142072,cg19211915,cg09234616,cg13641903,cg22533573,cg15315385
chr11	45944016	45944030	45944018	UAK42	1-04893	cg20608085,cg07298299,cg05265359	chr11:45943129-45944092	1-04893,1-01306,1-06988,1-04389,1-04460,1-04512	6	cg20608085,cg07298299,cg05265359,cg03994942,cg00743139,cg00977061,cg23385550
chr11	47293763	47293777	47293772	MEF2	1-03393	cg09060462,cg26139080,cg22070650,cg16317516	chr11:47293671-47294197	1-03393	1	cg09060462,cg26139080,cg22070650,cg16317516
chr11	58673631	58673645	58673633	CTCF	1-05946	cg14797402,cg19392142,cg27230697,cg06548842	chr11:58672445-58673616	1-04893,1-05946	2	cg04681293,cg05443540,cg20009097,cg24569030,cg26379859,cg01869193,cg04067139,cg14797402,cg19392142,cg27230697,cg06548842
chr11	58869848	58869862	58869856	E2F1	1-00150	cg15313325,cg01976784,cg11104828,cg16611234	chr11:58869662-58870495	1-00150,1-03846,1-05613	3	cg15313325,cg01976784,cg26437112,cg11104828,cg16611234,cg20302957
chr11	58869850	58869869	58869856	E2F4	1-00150	cg15313325,cg01976784,cg11104828,cg16611234	chr11:58869662-58870495	1-00150,1-03846,1-05613	3	cg15313325,cg01976784,cg26437112,cg11104828,cg16611234,cg20302957
chr11	58869856	58869876	58869856	UAK25	1-00150	cg15313325,cg01976784,cg11104828,cg16611234	chr11:58869662-58870495	1-00150,1-03846,1-05613	3	cg15313325,cg01976784,cg26437112,cg11104828,cg16611234,cg20302957
chr11	58940299	58940318	58940308	UAK42	1-04893	cg14329059,cg17696194	chr11:58940865-58941416	1-00344,1-04893,1-03190,1-00543,1-01019,1-01256	6	cg05415131,cg14329059,cg17696194,cg07745373
chr11	59324978	59324993	59324978	B-Box	1-04389	cg05149097	chr11:59323069-59326240	1-02411,1-00150,1-04893,1-05009,1-00543,1-06204,1-06370,1-03897,1-04056,1-04113,1-02234,1-06537,1-04389	13	cg06533798,cg07079219,cg16283208,cg07178969,cg25506413,cg15297936,cg18489266,cg19809942,cg19579183,cg16082644,cg04896706,cg05149097,cg12974138,cg22430000,cg05649446,cg04258575
chr11	59325054	59325068	59325058	SP1	1-04113	cg04896706,cg12974138	chr11:59323069-59326240	1-02411,1-00150,1-04893,1-05009,1-00543,1-06204,1-06370,1-03897,1-04056,1-04113,1-02234,1-06537,1-04389	13	cg06533798,cg07079219,cg16283208,cg07178969,cg25506413,cg15297936,cg18489266,cg19809942,cg19579183,cg16082644,cg04896706,cg05149097,cg12974138,cg22430000,cg05649446,cg04258575
chr11	64703332	64703346	64703338	CTCF-ext	1-06537	cg20585500,cg03245641,cg12374682,cg06530365,cg00953720,cg07537750,cg07022279,cg23347611	chr11:64702920-64704282	1-06537	1	cg16704073,cg20585500,cg12945194,cg03245641,cg12374682,cg06530365,cg00953720,cg07537750,cg07022279,cg21100690,cg23347611
chr11	64764427	64764447	64764447	UAK25	1-05420	cg10392172,cg01654638	chr11:64764296-64765099	1-05420	1	cg10392172,cg01654638,cg17321617,cg17022914,cg23175322
chr11	64764433	64764447	64764447	ZNF143	1-05420	cg10392172,cg01654638	chr11:64764296-64765099	1-05420	1	cg10392172,cg01654638,cg17321617,cg17022914,cg23175322
chr11	64764435	64764449	64764447	CTCF	1-05420	cg10392172,cg01654638	chr11:64764296-64765099	1-05420	1	cg10392172,cg01654638,cg17321617,cg17022914,cg23175322
chr11	64764437	64764451	64764447	EBF1	1-05420	cg10392172,cg01654638	chr11:64764296-64765099	1-05420	1	cg10392172,cg01654638,cg17321617,cg17022914,cg23175322
chr11	65123190	65123204	65123200	UAK42	1-04624	cg27603069,cg23319460,cg23935420	chr11:65123373-65123610	1-04624	1	cg27603069,cg23319460,cg23935420
chr11	65196949	65196956	65196955	RUNX1	1-04782	cg03249011,cg22843803,cg20889322	chr11:65194932-65196623	1-00508,1-00517,1-05007,1-02874,1-05675,1-03472,1-03538,1-01984,1-02234,1-04460,1-09064,1-05443,1-05613,1-00344,1-04782,1-01306,1-06988	17	cg15920975,cg12155547,cg23523668,cg02345399,cg03249011,cg22843803,cg20889322
chr11	65196953	65196962	65196955	UAK20	1-04782	cg03249011,cg22843803,cg20889322	chr11:65194932-65196623	1-00508,1-00517,1-05007,1-02874,1-05675,1-03472,1-03538,1-01984,1-02234,1-04460,1-09064,1-05443,1-05613,1-00344,1-04782,1-01306,1-06988	17	cg15920975,cg12155547,cg23523668,cg02345399,cg03249011,cg22843803,cg20889322
chr11	65196954	65196961	65196955	UAK19	1-04782	cg03249011,cg22843803,cg20889322	chr11:65194932-65196623	1-00508,1-00517,1-05007,1-02874,1-05675,1-03472,1-03538,1-01984,1-02234,1-04460,1-09064,1-05443,1-05613,1-00344,1-04782,1-01306,1-06988	17	cg15920975,cg12155547,cg23523668,cg02345399,cg03249011,cg22843803,cg20889322
chr11	65313941	65313955	65313950	AP2	1-05007	cg04255276,cg13044675,cg19414233,cg24392577	chr11:65313316-65315626	1-00761,1-05007,1-05124,1-05846,1-01190,1-03825,1-03996,1-04232,1-07004,1-04376,1-00770,1-02024,1-00034,1-04466	14	cg13933491,cg04948284,cg04255276,cg13044675,cg27253286,cg19414233,cg05638689,cg24392577,cg21584461,cg23272978,cg07408779,cg16327477,cg09801334
chr11	65313942	65313957	65313950	UAK45	1-05007	cg04255276,cg13044675,cg19414233,cg24392577	chr11:65313316-65315626	1-00761,1-05007,1-05124,1-05846,1-01190,1-03825,1-03996,1-04232,1-07004,1-04376,1-00770,1-02024,1-00034,1-04466	14	cg13933491,cg04948284,cg04255276,cg13044675,cg27253286,cg19414233,cg05638689,cg24392577,cg21584461,cg23272978,cg07408779,cg16327477,cg09801334
chr11	66822677	66822692	66822685	UAK45	1-03846	cg14283328,cg12243133	chr11:66822852-66824466	1-04865,1-03627,1-03846,1-01238,1-06506,1-06643,1-04540,1-05476,1-04333	9	cg04216240,cg08221781,cg14283328,cg12243133,cg03160508,cg21541025,cg03166566,cg13388983,cg27175128,cg15693066,cg21695485,cg04420309,cg04784101
chr11	67777060	67777069	67777064	BHLHE40	1-04540	cg01577760,cg03146865	chr11:67775300-67776500	1-01984,1-04920,1-05093,1-03298,1-00832,1-00874,1-00982,1-04540	8	cg19933414,cg02494246,cg16313944,cg06518251,cg01577760,cg03146865
chr11	68781272	68781285	68781280	CEBPB	1-04774	cg21447477,cg12405136,cg22986999,cg21936959,cg02920396	chr11:68778849-68782212	1-06506,1-04071,1-04870,1-03190,1-00652,1-05911,1-03894,1-04774,1-01577,1-02413,1-07278,1-05437,1-00508,1-04920,1-04095,1-04112,1-01238,1-04164,1-04460,1-05420,1-03393,1-04113,1-01989,1-04537,1-05635	25	cg19738774,cg23031135,cg10417531,cg01289483,cg13734833,cg23882131,cg24241586,cg14152222,cg03522668,cg09102864,cg04658945,cg13997720,cg27214458,cg12642521,cg03465499,cg21447477,cg12405136,cg22986999,cg21936959,cg25807487,cg05771342,cg02920396
chr11	74951563	74951580	74951566	ZNF263	1-02959	cg14237981,cg25782983,cg11464189,cg21752517	chr11:74950395-74951360	1-02959,1-03190,1-03652,1-06506	4	cg27138871,cg14237981,cg25782983,cg11464189,cg02426999,cg21752517
chr11	76757280	76757294	76757291	CTCF	1-01260	cg11791039,cg23602829,cg13712686	chr11:76757005-76757533	1-01260	1	cg08832596,cg11791039,cg23602829,cg12933507,cg19899312,cg13712686
chr11	76757282	76757296	76757291	UA3	1-01260	cg11791039,cg23602829,cg13712686	chr11:76757005-76757533	1-01260	1	cg08832596,cg11791039,cg23602829,cg12933507,cg19899312,cg13712686
chr11	76757282	76757302	76757291	UAK25	1-01260	cg11791039,cg23602829,cg13712686	chr11:76757005-76757533	1-01260	1	cg08832596,cg11791039,cg23602829,cg12933507,cg19899312,cg13712686
chr11	76757287	76757301	76757291	SP1	1-01260	cg11791039,cg23602829,cg13712686	chr11:76757005-76757533	1-01260	1	cg08832596,cg11791039,cg23602829,cg12933507,cg19899312,cg13712686
chr11	77301028	77301042	77301033	YY1	1-00041	cg15441833,cg06022507	chr11:77299428-77300764	1-00041,1-04774,1-02627,1-02544,1-05946,1-06321,1-00854,1-00876,1-01049,1-04112,1-02234,1-02241,1-06506,1-04367,1-07593,1-04523	16	cg19733504,cg12586386,cg06061081,cg04518186,cg15441833,cg18349420,cg16768953,cg20165111,cg15813330,cg02506426,cg21926750,cg09706988,cg14147074,cg21573582
chr11	112045940	112045954	112045953	CTCF	1-01019	cg03289681,cg02168558,cg06091177,cg19680332	chr11:112045393-112046964	1-01019	1	cg18481884,cg23809118,cg03289681,cg02168558,cg06091177,cg19680332,cg10503334,cg02119229,cg25303383,cg08355483,cg26581504
chr11	117070033	117070047	117070046	v-JUN	1-04631	cg11861562,cg10130564,cg15534755,cg26566898,cg03276022	chr11:117068862-117070486	1-00347,1-00770,1-04693,1-04975,1-04631,1-03038,1-06401,1-00914,1-00982,1-01053,1-01174,1-03842,1-03897,1-04506,1-02491,1-07278,1-00041,1-00150,1-00517,1-04782,1-03190,1-06321,1-00808,1-00818,1-03472,1-03840,1-03894,1-04112,1-06506	29	cg13417301,cg14389341,cg06950730,cg11861562,cg10130564,cg15534755,cg26566898,cg03276022,cg24319867,cg16524733,cg24619694
chr11	118978026	118978046	118978037	UAK42	1-03059	cg11540207,cg25643782	chr11:118978102-118979092	1-03059	1	cg23558831,cg11323020,cg25643782,cg25611931,cg19232583,cg21303272
chr11	118978030	118978044	118978037	CTCF	1-03059	cg11540207,cg25643782	chr11:118978102-118979092	1-03059	1	cg23558831,cg11323020,cg25643782,cg25611931,cg19232583,cg21303272
chr11	118978036	118978050	118978037	SP1	1-03059	cg11540207,cg25643782	chr11:118978102-118979092	1-03059	1	cg23558831,cg11323020,cg25643782,cg25611931,cg19232583,cg21303272
chr11	124746662	124746683	124746672	SP1	1-04540	cg21071117,cg01253160,cg02940147	chr11:124746322-124747997	1-02917,1-04540	2	cg19699250,cg24749138,cg21651465,cg16369879,cg08833670,cg07451926,cg21071117,cg01253160,cg02940147,cg20066558
chr11	133657812	133657831	133657818	E2F4	1-00389	cg12105941,cg16630482,cg11395954	chr11:133657465-133658114	1-00389,1-06321,1-04071,1-02024,1-06506,1-07386	6	cg12105941,cg16630482,cg11395954,cg10486069
chr12	1772191	1772205	1772194	UAK42	1-04056	cg03371962,cg01917080	chr12:1770714-1773109	1-00739,1-00034,1-00197,1-00508,1-04782,1-04056,1-01242,1-07278,1-05613	9	cg18612255,cg05227549,cg26684289,cg01173912,cg24894584,cg03371962,cg01917080,cg09142405
chr12	3862413	3862427	3862422	UAK42	1-05124	cg09172548,cg04804877,cg03485694,cg12710510,cg21723903,cg03535793,cg14759043	chr12:3861566-3862598	1-00150,1-04719,1-05093,1-05124,1-05360,1-03991,1-02024,1-04465	8	cg17904739,cg03510349,cg09172548,cg04804877,cg03397307,cg16133088,cg05972871,cg26955987,cg03485694,cg12710510,cg21723903,cg03535793,cg14759043
chr12	3862417	3862431	3862422	SP1	1-05124	cg09172548,cg04804877,cg03485694,cg12710510,cg21723903,cg03535793,cg14759043	chr12:3861566-3862598	1-00150,1-04719,1-05093,1-05124,1-05360,1-03991,1-02024,1-04465	8	cg17904739,cg03510349,cg09172548,cg04804877,cg03397307,cg16133088,cg05972871,cg26955987,cg03485694,cg12710510,cg21723903,cg03535793,cg14759043
chr12	6472502	6472519	6472508	CREB-ext	1-03298	cg03196720,cg06029700,cg13805993	chr12:6472690-6473644	1-03298,1-05675,1-01019,1-06506,1-05597	5	cg19389641,cg02891801,cg20621699,cg01807820,cg03196720,cg06029700,cg13805993,cg11026867
chr12	6744782	6744796	6744785	UAK42	1-03825	cg23736020,cg25655096,cg26233227,cg05924780	chr12:6745170-6746031	1-00150,1-00319,1-04655,1-04782,1-04975,1-05009,1-02627,1-02900,1-02917,1-02959,1-00625,1-05675,1-03538,1-00894,1-00914,1-01049,1-03825,1-04112,1-01242,1-01553,1-01805,1-04139,1-06506,1-06988,1-04389,1-04460,1-02413,1-07419,1-05420,1-05443,1-05597	31	cg12018809,cg23736020,cg25655096,cg18951718,cg26233227,cg16510709,cg05924780,cg06588028,cg03070999,cg13171103,cg10457436,cg13690828
chr12	6744785	6744799	6744785	ZNF263	1-03825	cg23736020,cg25655096,cg26233227,cg05924780	chr12:6745170-6746031	1-00150,1-00319,1-04655,1-04782,1-04975,1-05009,1-02627,1-02900,1-02917,1-02959,1-00625,1-05675,1-03538,1-00894,1-00914,1-01049,1-03825,1-04112,1-01242,1-01553,1-01805,1-04139,1-06506,1-06988,1-04389,1-04460,1-02413,1-07419,1-05420,1-05443,1-05597	31	cg12018809,cg23736020,cg25655096,cg18951718,cg26233227,cg16510709,cg05924780,cg06588028,cg03070999,cg13171103,cg10457436,cg13690828
chr12	31881379	31881418	31881398	UAK17	1-05124	cg12138057,cg15592187,cg12563240,cg14202610,cg09917807,cg07007050	chr12:31881432-31882932	1-05124,1-03258	2	cg22929235,cg09074965,cg11243680,cg03532709,cg22489277,cg12138057,cg15592187,cg12563240,cg18813353,cg14202610,cg09917807,cg07007050,cg16014770,cg04176360,cg27255235
chr12	49688576	49688590	49688576	ZNF263	1-04774	cg16205352	chr12:49686618-49688981	1-04893,1-04921,1-04926,1-02544,1-02959,1-03190,1-05675,1-05911,1-03538,1-04112,1-04113,1-02234,1-06988,1-04389,1-04460,1-04466,1-02413,1-07442,1-05597,1-00508,1-04782,1-00041,1-04774,1-04975	24	cg08812802,cg10476600,cg04123862,cg01197526,cg06762206,cg07031558,cg17997633,cg16378835,cg25763520,cg16205352,cg24059075,cg22379213,cg07856470,cg16374999
chr12	49726828	49726842	49726829	NRF1	1-01238	cg14846292,cg17570948,cg11949060,cg10246081	chr12:49726499-49727111	1-11800,1-01238,1-06506,1-04540	4	cg14846292,cg17570948,cg11949060,cg10246081,cg12760869
chr12	50356854	50356867	50356854	AP1	1-00655	cg04450003,cg24060564,cg27391744	chr12:50354839-50357353	1-06321,1-06506,1-00667,1-00854,1-01238,1-04589,1-02544,1-00914,1-04112,1-04460,1-04774,1-00655,1-04389	13	cg26328335,cg03020208,cg08266366,cg15336765,cg26335476,cg23855989,cg04450003,cg24060564,cg05242826,cg12690246,cg27391744,cg03339560
chr12	52214753	52214767	52214765	NRF1	1-04071	cg19495013,cg07375978,cg05238741,cg18259930,cg19856499,cg11869007	chr12:52214118-52215973	1-11800,1-03538,1-04071,1-02411	4	cg19495013,cg07375978,cg05238741,cg18259930,cg19856499,cg11869007,cg07529392
chr12	52214759	52214778	52214765	E2F4	1-04071	cg19495013,cg07375978,cg05238741,cg18259930,cg19856499,cg11869007	chr12:52214118-52215973	1-11800,1-03538,1-04071,1-02411	4	cg19495013,cg07375978,cg05238741,cg18259930,cg19856499,cg11869007,cg07529392
chr12	53645800	53645819	53645804	E2F4	1-04512	cg14195318,cg06845722,cg25305677,cg15332241	chr12:53644993-53646163	1-04920,1-04465,1-04512,1-04588	4	cg14195318,cg07135303,cg06845722,cg25305677,cg15332241,cg08023809,cg12835684,cg13236315,cg12586596,cg03744437,cg00285950,cg00815109,cg00474734,cg27467734
chr12	54746115	54746140	54746128	UAK42	1-00982	cg14027571,cg20474425,cg09009538,cg21727049	chr12:54745919-54746617	1-00982,1-03897,1-01553	3	cg14027571,cg20474425,cg09009538,cg21727049,cg24541997
chr12	54746115	54746140	54746128	UAK42	1-01553	cg14027571,cg20474425,cg09009538,cg21727049	chr12:54745919-54746617	1-00982,1-03897,1-01553	3	cg14027571,cg20474425,cg09009538,cg21727049,cg24541997
chr12	54746123	54746137	54746128	ZNF263	1-00982	cg14027571,cg20474425,cg09009538,cg21727049	chr12:54745919-54746617	1-00982,1-03897,1-01553	3	cg14027571,cg20474425,cg09009538,cg21727049,cg24541997
chr12	54746123	54746137	54746128	ZNF263	1-01553	cg14027571,cg20474425,cg09009538,cg21727049	chr12:54745919-54746617	1-00982,1-03897,1-01553	3	cg14027571,cg20474425,cg09009538,cg21727049,cg24541997
chr12	54943471	54943488	54943480	ZNF263	1-00304	cg06793728,cg21370074,cg18989215,cg13565157	chr12:54942781-54943785	1-00304,1-02918,1-06506	3	cg06860371,cg06793728,cg21370074,cg18989215,cg13565157,cg08935389,cg00433224,cg06901488,cg04967752,cg24020814,cg15927682,cg20347552,cg26351054,cg07442759
chr12	56862230	56862245	56862238	UAK45	1-05443	cg26547506,cg11917783	chr12:56862145-56863390	1-00046,1-00652,1-05926,1-01313,1-04252,1-06690,1-04466,1-04893,1-04926,1-05093,1-03627,1-04112,1-07026,1-04465,1-05443	15	cg16523471,cg12879164,cg22871548,cg19843028,cg06107469,cg12264551,cg09060823,cg26146585,cg07427396,cg21056764,cg16242775,cg05452419,cg26547506,cg11917783,cg20445571
chr12	56862235	56862254	56862238	E2F4	1-05443	cg26547506,cg11917783	chr12:56862145-56863390	1-00046,1-00652,1-05926,1-01313,1-04252,1-06690,1-04466,1-04893,1-04926,1-05093,1-03627,1-04112,1-07026,1-04465,1-05443	15	cg16523471,cg12879164,cg22871548,cg19843028,cg06107469,cg12264551,cg09060823,cg26146585,cg07427396,cg21056764,cg16242775,cg05452419,cg26547506,cg11917783,cg20445571
chr12	56862398	56862412	56862411	NRF1	1-04926	cg05452419,cg26547506,cg20445571	chr12:56862145-56863390	1-00046,1-00652,1-05926,1-01313,1-04252,1-06690,1-04466,1-04893,1-04926,1-05093,1-03627,1-04112,1-07026,1-04465,1-05443	15	cg16523471,cg12879164,cg22871548,cg19843028,cg06107469,cg12264551,cg09060823,cg26146585,cg07427396,cg21056764,cg16242775,cg05452419,cg26547506,cg11917783,cg20445571
chr12	58329945	58329959	58329957	ZNF143	1-02411	cg14878686,cg09932636,cg02175503,cg06537201	chr12:58329763-58330116	1-02411	1	cg14878686,cg09932636,cg02175503,cg06537201
chr12	89747859	89747873	89747865	SP1	1-02926	cg08802841,cg15296664,cg05589489	chr12:89748299-89749823	1-00041,1-00347,1-00423,1-04719,1-04774,1-04911,1-05379,1-02812,1-02918,1-02926,1-03190,1-00625,1-06204,1-03846,1-04071,1-04113,1-04164,1-07004,1-04299,1-04380,1-04389,1-02411,1-05420,1-05437,1-05613	25	cg06192866,cg08802841,cg15296664,cg05589489,cg12414174,cg05403689,cg13519918,cg03689403,cg11902362
chr12	89747862	89747874	89747865	UA2	1-02926	cg08802841,cg15296664,cg05589489	chr12:89748299-89749823	1-00041,1-00347,1-00423,1-04719,1-04774,1-04911,1-05379,1-02812,1-02918,1-02926,1-03190,1-00625,1-06204,1-03846,1-04071,1-04113,1-04164,1-07004,1-04299,1-04380,1-04389,1-02411,1-05420,1-05437,1-05613	25	cg06192866,cg08802841,cg15296664,cg05589489,cg12414174,cg05403689,cg13519918,cg03689403,cg11902362
chr12	95945378	95945392	95945390	SP1	1-00832	cg03453449,cg08948170,cg06476970,cg04488758,cg14565151	chr12:95945081-95946132	1-00034,1-00041,1-00389,1-04921,1-04975,1-02544,1-03374,1-00832,1-01256,1-01869,1-01984,1-02260,1-06690,1-06988,1-04333,1-04460,1-04465,1-04466,1-07442,1-04588,1-05597	21	cg11069430,cg03453449,cg08948170,cg06476970,cg04488758,cg14565151,cg25590081,cg16192751,cg00116583,cg16499829
chr12	103890246	103890260	103890260	PU1	1-02544	cg14380586,cg25744898,cg06824277	chr12:103889041-103890790	1-04835,1-02544,1-04523	3	cg25935014,cg22754765,cg21837669,cg10096177,cg00259618,cg26381364,cg11342468,cg13702005,cg03882242,cg06664258,cg14380586,cg11743448,cg25744898,cg12814529,cg06824277,cg07317326,cg02776750
chr12	107381033	107381047	107381036	SP1	1-04466	cg07870003,cg21834204,cg07735826	chr12:107380498-107381863	1-04466	1	cg24646513,cg05575399,cg10574483,cg21581733,cg14135757,cg07870003,cg06758649,cg08335702,cg21834204,cg07735826,cg21935516,cg02274284
chr12	108992047	108992061	108992053	PU1	1-00818	cg16708012,cg02768162	chr12:108991776-108992683	1-00818,1-07278,1-05597	3	cg22836470,cg16708012,cg02768162,cg11706083,cg17857510,cg09834392
chr12	108992047	108992061	108992053	ZNF263	1-00818	cg16708012,cg02768162	chr12:108991776-108992683	1-00818,1-07278,1-05597	3	cg22836470,cg16708012,cg02768162,cg11706083,cg17857510,cg09834392
chr12	109548920	109548934	109548920	SP1	1-06643	cg12009719,cg16346844,cg23615096,cg24460369,cg10651121	chr12:109548680-109549870	1-00390,1-04782,1-02918,1-00543,1-00625,1-03298,1-05977,1-06321,1-00913,1-03627,1-03825,1-01313,1-01577,1-01984,1-02183,1-02234,1-06506,1-06643,1-04400,1-04523	20	cg03244974,cg12009719,cg16346844,cg23615096,cg03421507,cg24460369,cg10651121,cg05481085
chr12	123380783	123380793	123380783	TEAD4	1-05613	cg14271454,cg24664957,cg24033228	chr12:123380446-123381822	1-04893,1-11800,1-02769,1-03538,1-03825,1-06506,1-04466,1-05613	8	cg20361540,cg15164871,cg26942772,cg24691904,cg10848724,cg03434624,cg06634460,cg14271454,cg24664957,cg24033228,cg25079997,cg16573251,cg06215041,cg17246816
chr12	123465192	123465213	123465212	EGR1	1-04466	cg21745287,cg02390806,cg26705986,cg13010344,cg16697799	chr12:123463761-123465585	1-00034,1-00389,1-04782,1-04893,1-03038,1-00625,1-06506,1-04466,1-04624,1-05597	10	cg08934286,cg02203224,cg04180275,cg21745287,cg02390806,cg26705986,cg14409041,cg13010344,cg16697799,cg20000049,cg22237346,cg26562417,cg26808298,cg00458555,cg16651334,cg24607725,cg06504337,cg09170404,cg23312248,cg14403664,cg07154230
chr12	123465200	123465214	123465212	E2F1	1-04466	cg21745287,cg02390806,cg26705986,cg13010344,cg16697799	chr12:123463761-123465585	1-00034,1-00389,1-04782,1-04893,1-03038,1-00625,1-06506,1-04466,1-04624,1-05597	10	cg08934286,cg02203224,cg04180275,cg21745287,cg02390806,cg26705986,cg14409041,cg13010344,cg16697799,cg20000049,cg22237346,cg26562417,cg26808298,cg00458555,cg16651334,cg24607725,cg06504337,cg09170404,cg23312248,cg14403664,cg07154230
chr12	123465213	123465227	123465223	UA6	1-00034	cg21745287,cg02390806,cg26705986,cg13010344,cg16697799	chr12:123463761-123465585	1-00034,1-00389,1-04782,1-04893,1-03038,1-00625,1-06506,1-04466,1-04624,1-05597	10	cg08934286,cg02203224,cg04180275,cg21745287,cg02390806,cg26705986,cg14409041,cg13010344,cg16697799,cg20000049,cg22237346,cg26562417,cg26808298,cg00458555,cg16651334,cg24607725,cg06504337,cg09170404,cg23312248,cg14403664,cg07154230
chr12	123465213	123465228	123465223	PAX5	1-00034	cg21745287,cg02390806,cg26705986,cg13010344,cg16697799	chr12:123463761-123465585	1-00034,1-00389,1-04782,1-04893,1-03038,1-00625,1-06506,1-04466,1-04624,1-05597	10	cg08934286,cg02203224,cg04180275,cg21745287,cg02390806,cg26705986,cg14409041,cg13010344,cg16697799,cg20000049,cg22237346,cg26562417,cg26808298,cg00458555,cg16651334,cg24607725,cg06504337,cg09170404,cg23312248,cg14403664,cg07154230
chr12	123465216	123465237	123465223	EGR1	1-00034	cg21745287,cg02390806,cg26705986,cg13010344,cg16697799	chr12:123463761-123465585	1-00034,1-00389,1-04782,1-04893,1-03038,1-00625,1-06506,1-04466,1-04624,1-05597	10	cg08934286,cg02203224,cg04180275,cg21745287,cg02390806,cg26705986,cg14409041,cg13010344,cg16697799,cg20000049,cg22237346,cg26562417,cg26808298,cg00458555,cg16651334,cg24607725,cg06504337,cg09170404,cg23312248,cg14403664,cg07154230
chr12	123465219	123465229	123465223	ELF1	1-00034	cg21745287,cg02390806,cg26705986,cg13010344,cg16697799	chr12:123463761-123465585	1-00034,1-00389,1-04782,1-04893,1-03038,1-00625,1-06506,1-04466,1-04624,1-05597	10	cg08934286,cg02203224,cg04180275,cg21745287,cg02390806,cg26705986,cg14409041,cg13010344,cg16697799,cg20000049,cg22237346,cg26562417,cg26808298,cg00458555,cg16651334,cg24607725,cg06504337,cg09170404,cg23312248,cg14403664,cg07154230
chr12	123465219	123465229	123465223	GABP	1-00034	cg21745287,cg02390806,cg26705986,cg13010344,cg16697799	chr12:123463761-123465585	1-00034,1-00389,1-04782,1-04893,1-03038,1-00625,1-06506,1-04466,1-04624,1-05597	10	cg08934286,cg02203224,cg04180275,cg21745287,cg02390806,cg26705986,cg14409041,cg13010344,cg16697799,cg20000049,cg22237346,cg26562417,cg26808298,cg00458555,cg16651334,cg24607725,cg06504337,cg09170404,cg23312248,cg14403664,cg07154230
chr12	131519591	131519605	131519591	RXRA	1-02918	cg24311634,cg13586425,cg25772418,cg11821532,cg26184673,cg22439613	chr12:131519882-131520383	1-00041,1-04652,1-04693,1-05007,1-02627,1-02918,1-03275,1-05726,1-01075,1-01218,1-03825,1-03846,1-04095,1-08788,1-07442,1-04537,1-04588	17	cg24311634,cg13586425,cg25772418,cg11821532,cg26184673,cg22439613
chr12	133009592	133009613	133009604	EGR1	1-04071	cg14751481,cg09013480,cg00005541,cg04381298	chr12:133009354-133009957	1-04071	1	cg14751481,cg09013480,cg00005541,cg04381298
chr12	133100592	133100606	133100593	CTCF	1-02793	cg05767299,cg27655716,cg00688311	chr12:133099756-133101613	1-02793	1	cg13742740,cg00105852,cg02656049,cg15111626,cg06834712,cg05767299,cg23350889,cg27655716,cg00688311,cg07775147,cg19510206,cg10378521
chr13	28553015	28553025	28553021	UA9	1-05443	cg09781827	chr13:28553549-28555388	1-00304,1-00761,1-02900,1-02918,1-03159,1-00808,1-01242,1-06643,1-07026,1-02987,1-03627,1-01306,1-05443,1-05613	14	cg20101529,cg02645340,cg07911080,cg09781827,cg13156931,cg25591794,cg15332217,cg21950155
chr13	52419343	52419364	52419363	EGR1	1-04624	cg04647790,cg18997137,cg10390211	chr13:52419264-52419729	1-01238,1-04624	2	cg04647790,cg09258993,cg14854055,cg06100461,cg08043656,cg01657556,cg18997137,cg16096766,cg10390211
chr13	52419351	52419366	52419363	MYC	1-04624	cg04647790,cg18997137,cg10390211	chr13:52419264-52419729	1-01238,1-04624	2	cg04647790,cg09258993,cg14854055,cg06100461,cg08043656,cg01657556,cg18997137,cg16096766,cg10390211
chr13	60841697	60841714	60841705	UAK33	1-01017	cg26356683,cg19745934,cg03593908	chr13:60841984-60842300	1-02917,1-02544,1-01017,1-03842,1-01238,1-04203,1-07004,1-04333,1-07555	9	cg26356683,cg19745934,cg03593908
chr13	60841697	60841714	60841705	UAK33	1-07555	cg26356683,cg19745934,cg03593908	chr13:60841984-60842300	1-02917,1-02544,1-01017,1-03842,1-01238,1-04203,1-07004,1-04333,1-07555	9	cg26356683,cg19745934,cg03593908
chr13	60841699	60841719	60841705	ZNF143-ext	1-01017	cg26356683,cg19745934,cg03593908	chr13:60841984-60842300	1-02917,1-02544,1-01017,1-03842,1-01238,1-04203,1-07004,1-04333,1-07555	9	cg26356683,cg19745934,cg03593908
chr13	60841699	60841719	60841705	ZNF143-ext	1-07555	cg26356683,cg19745934,cg03593908	chr13:60841984-60842300	1-02917,1-02544,1-01017,1-03842,1-01238,1-04203,1-07004,1-04333,1-07555	9	cg26356683,cg19745934,cg03593908
chr13	107028889	107028907	107028901	AP1	1-03676	cg16502555	chr13:107028506-107029444	1-03676	1	cg09827863,cg23773496,cg16502555,cg16210355,cg05372727,cg19205281,cg13822911,cg02205193,cg01027209
chr13	114814590	114814600	114814596	TCF12	1-00543	cg23312375,cg23132774,cg27119904,cg01289343	chr13:114813508-114815120	1-04865,1-05379,1-02627,1-02786,1-03159,1-00543,1-05977,1-06370,1-00894,1-01174,1-03972,1-01553,1-06506,1-06988,1-04400,1-02411,1-05420,1-05635	18	cg06834127,cg23312375,cg13557773,cg23132774,cg27119904,cg01289343,cg11549417,cg08617982,cg19301827,cg11504805
chr13	114814590	114814600	114814596	TCF3	1-00543	cg23312375,cg23132774,cg27119904,cg01289343	chr13:114813508-114815120	1-04865,1-05379,1-02627,1-02786,1-03159,1-00543,1-05977,1-06370,1-00894,1-01174,1-03972,1-01553,1-06506,1-06988,1-04400,1-02411,1-05420,1-05635	18	cg06834127,cg23312375,cg13557773,cg23132774,cg27119904,cg01289343,cg11549417,cg08617982,cg19301827,cg11504805
chr13	114814594	114814601	114814596	UAK30	1-00543	cg23312375,cg23132774,cg27119904,cg01289343	chr13:114813508-114815120	1-04865,1-05379,1-02627,1-02786,1-03159,1-00543,1-05977,1-06370,1-00894,1-01174,1-03972,1-01553,1-06506,1-06988,1-04400,1-02411,1-05420,1-05635	18	cg06834127,cg23312375,cg13557773,cg23132774,cg27119904,cg01289343,cg11549417,cg08617982,cg19301827,cg11504805
chr14	31343805	31343820	31343817	PAX5	1-01306	cg02047809,cg16316627,cg26107597,cg16966992,cg26069353	chr14:31343145-31344151	1-00046,1-01306,1-06506,1-04389,1-05597	5	cg02047809,cg16316627,cg26107597,cg16966992,cg26069353,cg08463931,cg09290941,cg24545338,cg20296668,cg24131748,cg18438546,cg08630047,cg17591270
chr14	31343808	31343827	31343817	E2F4	1-01306	cg02047809,cg16316627,cg26107597,cg16966992,cg26069353	chr14:31343145-31344151	1-00046,1-01306,1-06506,1-04389,1-05597	5	cg02047809,cg16316627,cg26107597,cg16966992,cg26069353,cg08463931,cg09290941,cg24545338,cg20296668,cg24131748,cg18438546,cg08630047,cg17591270
chr14	31343810	31343824	31343817	UAK42	1-01306	cg02047809,cg16316627,cg26107597,cg16966992,cg26069353	chr14:31343145-31344151	1-00046,1-01306,1-06506,1-04389,1-05597	5	cg02047809,cg16316627,cg26107597,cg16966992,cg26069353,cg08463931,cg09290941,cg24545338,cg20296668,cg24131748,cg18438546,cg08630047,cg17591270
chr14	70193690	70193700	70193699	ETS1	1-00625	cg00176264,cg22365339,cg11344148,cg12848614	chr14:70192771-70193982	1-00150,1-00667,1-00761,1-00543,1-00625,1-00655,1-03422,1-03627,1-06506,1-05570	10	cg08601948,cg00176264,cg22365339,cg11344148,cg12848614,cg11051407,cg05969063,cg07141622,cg26142058
chr14	93389594	93389608	93389603	NRF1	1-00319	cg01901466,cg23788212,cg00813752,cg16290737,cg02706439,cg04453367,cg13332653	chr14:93388799-93389877	1-00046,1-00319,1-00347,1-00389,1-04865,1-05093,1-02652,1-02874,1-02918,1-03159,1-05888,1-06321,1-03534,1-03825,1-04112,1-01238,1-01304,1-01306,1-01384,1-06506,1-07551,1-04624	22	cg21359903,cg01901466,cg23788212,cg23013853,cg00813752,cg16290737,cg02706439,cg04453367,cg13332653,cg02327501,cg15480367,cg05700406,cg16086620,cg21620282,cg27018380
chr14	93389868	93389888	93389884	REST	1-02652	cg01901466,cg23788212,cg23013853,cg04453367	chr14:93388799-93389877	1-00046,1-00319,1-00347,1-00389,1-04865,1-05093,1-02652,1-02874,1-02918,1-03159,1-05888,1-06321,1-03534,1-03825,1-04112,1-01238,1-01304,1-01306,1-01384,1-06506,1-07551,1-04624	22	cg21359903,cg01901466,cg23788212,cg23013853,cg00813752,cg16290737,cg02706439,cg04453367,cg13332653,cg02327501,cg15480367,cg05700406,cg16086620,cg21620282,cg27018380
chr14	93389884	93389898	93389884	SP1	1-02652	cg23788212,cg23013853,cg04453367	chr14:93388799-93389877	1-00046,1-00319,1-00347,1-00389,1-04865,1-05093,1-02652,1-02874,1-02918,1-03159,1-05888,1-06321,1-03534,1-03825,1-04112,1-01238,1-01304,1-01306,1-01384,1-06506,1-07551,1-04624	22	cg21359903,cg01901466,cg23788212,cg23013853,cg00813752,cg16290737,cg02706439,cg04453367,cg13332653,cg02327501,cg15480367,cg05700406,cg16086620,cg21620282,cg27018380
chr14	95330836	95330850	95330846	CTCF	1-00508	cg03459776,cg00814780	chr14:95330879-95331467	1-00508,1-00761,1-04865,1-04926,1-02786,1-03038,1-05888,1-03652,1-01045,1-01577,1-02260,1-04252,1-06506,1-02413,1-07593,1-04588,1-05613	17	cg18939596,cg19453488,cg03459776,cg00814780,cg23697093
chr14	101290733	101290747	101290740	NFY	1-03224	cg13709211,cg00764369,cg23870378,cg14034270,cg16567044,cg10540302,cg02313552,cg02888166,cg24089209,cg16738180,cg19643803,cg09280976	chr14:101290194-101292150	1-03224	1	cg13709211,cg00764369,cg10515315,cg15991553,cg23870378,cg14034270,cg16567044,cg10540302,cg02313552,cg02982753,cg02888166,cg24089209,cg16738180,cg19643803,cg10065153,cg09280976,cg22940816,cg14070323,cg14119337,cg20952167,cg12967319,cg04304932,cg04576764
chr14	105167318	105167337	105167332	E2F4	1-04540	cg23998240,cg01836137,cg27286011,cg11730703	chr14:105166739-105168129	1-00667,1-05124,1-05174,1-03001,1-00625,1-03422,1-03538,1-04164,1-06643,1-04540,1-04299	11	cg23998240,cg01836137,cg13578465,cg27286011,cg11730703,cg18425377,cg17331554,cg03576530,cg03719908
chr14	105167328	105167342	105167332	UAK42	1-04540	cg23998240,cg01836137,cg27286011,cg11730703	chr14:105166739-105168129	1-00667,1-05124,1-05174,1-03001,1-00625,1-03422,1-03538,1-04164,1-06643,1-04540,1-04299	11	cg23998240,cg01836137,cg13578465,cg27286011,cg11730703,cg18425377,cg17331554,cg03576530,cg03719908
chr14	105943083	105943090	105943086	UAK49	1-00982	cg08182193,cg01564661,cg17700584	chr14:105942242-105946394	1-11800,1-03159,1-00982,1-03676,1-03842,1-05420,1-07419,1-05613,1-06988,1-00801,1-04692,1-04782,1-04893,1-05153,1-05174,1-06321,1-03538,1-04466,1-04652,1-02786,1-02918,1-06401,1-03422,1-02411,1-07084,1-04588,1-00304,1-05360,1-06248,1-01174,1-01256,1-06690,1-04460	33	cg08182193,cg01564661,cg00696647,cg00684283,cg17700584,cg13667739,cg06285241,cg21137924,cg04439622,cg04329125,cg27279301,cg05185038,cg12488111,cg26326372
chr15	22833763	22833777	22833777	UAK42	1-02926	cg07959104,cg17809365,cg16707215	chr15:22833148-22833976	1-00112,1-00344,1-00423,1-04901,1-04920,1-02926,1-00854,1-00874,1-03649,1-03652,1-01053,1-03840,1-01553,1-02408,1-05635	15	cg07959104,cg17809365,cg16707215,cg18106434,cg24525828,cg16639637,cg06756169,cg17121412,cg02478956,cg17161804,cg09762043,cg25490410
chr15	22833767	22833787	22833777	SP1	1-02926	cg07959104,cg17809365,cg16707215	chr15:22833148-22833976	1-00112,1-00344,1-00423,1-04901,1-04920,1-02926,1-00854,1-00874,1-03649,1-03652,1-01053,1-03840,1-01553,1-02408,1-05635	15	cg07959104,cg17809365,cg16707215,cg18106434,cg24525828,cg16639637,cg06756169,cg17121412,cg02478956,cg17161804,cg09762043,cg25490410
chr15	22833771	22833791	22833777	E2F1	1-02926	cg07959104,cg17809365,cg16707215	chr15:22833148-22833976	1-00112,1-00344,1-00423,1-04901,1-04920,1-02926,1-00854,1-00874,1-03649,1-03652,1-01053,1-03840,1-01553,1-02408,1-05635	15	cg07959104,cg17809365,cg16707215,cg18106434,cg24525828,cg16639637,cg06756169,cg17121412,cg02478956,cg17161804,cg09762043,cg25490410
chr15	23890618	23890632	23890622	CTCF	1-05476	cg04014889,cg01678091,cg24434303	chr15:23890592-23891403	1-02926,1-00610,1-03676,1-05476	4	cg04014889,cg01678091,cg02982734,cg12809804,cg13037971,cg24434303,cg21325760
chr15	25123565	25123582	25123566	CREB-ext	1-00174	cg27644292,cg08560373	chr15:25123286-25124214	1-00174,1-04865,1-05124,1-02769,1-06248,1-00832,1-01017,1-03649,1-03840,1-04164,1-04506,1-02413	12	cg27644292,cg08560373,cg25657700,cg01786704,cg21870668,cg21061553
chr15	30162913	30162924	30162923	UA9	1-04523	cg00232832,cg04635635,cg23256343	chr15:30163424-30163826	1-00080,1-04870,1-04920,1-02544,1-00543,1-00625,1-05888,1-00876,1-01553,1-01577,1-04139,1-04190,1-06537,1-07419,1-04523,1-09064	16	cg09969827,cg00232832,cg04635635,cg23256343
chr15	44119161	44119175	44119171	SP1	1-02841	cg00357503,cg17935677,cg22136124,cg14529224,cg26847753,cg10739344,cg18592307,cg16494108	chr15:44118604-44120023	1-02841	1	cg08080024,cg02879467,cg00357503,cg17935677,cg22136124,cg14529224,cg26847753,cg10739344,cg18592307,cg16494108
chr15	44119163	44119177	44119171	E2F1	1-02841	cg00357503,cg17935677,cg22136124,cg14529224,cg26847753,cg10739344,cg18592307,cg16494108	chr15:44118604-44120023	1-02841	1	cg08080024,cg02879467,cg00357503,cg17935677,cg22136124,cg14529224,cg26847753,cg10739344,cg18592307,cg16494108
chr15	44119164	44119176	44119171	UA2	1-02841	cg00357503,cg17935677,cg22136124,cg14529224,cg26847753,cg10739344,cg18592307,cg16494108	chr15:44118604-44120023	1-02841	1	cg08080024,cg02879467,cg00357503,cg17935677,cg22136124,cg14529224,cg26847753,cg10739344,cg18592307,cg16494108
chr15	44119164	44119183	44119171	E2F4	1-02841	cg00357503,cg17935677,cg22136124,cg14529224,cg26847753,cg10739344,cg18592307,cg16494108	chr15:44118604-44120023	1-02841	1	cg08080024,cg02879467,cg00357503,cg17935677,cg22136124,cg14529224,cg26847753,cg10739344,cg18592307,cg16494108
chr15	44119166	44119180	44119171	CTCF	1-02841	cg00357503,cg17935677,cg22136124,cg14529224,cg26847753,cg10739344,cg18592307,cg16494108	chr15:44118604-44120023	1-02841	1	cg08080024,cg02879467,cg00357503,cg17935677,cg22136124,cg14529224,cg26847753,cg10739344,cg18592307,cg16494108
chr15	44119170	44119184	44119171	UAK42	1-02841	cg00357503,cg17935677,cg22136124,cg14529224,cg26847753,cg10739344,cg18592307,cg16494108	chr15:44118604-44120023	1-02841	1	cg08080024,cg02879467,cg00357503,cg17935677,cg22136124,cg14529224,cg26847753,cg10739344,cg18592307,cg16494108
chr15	63570062	63570076	63570063	UAK42	1-04466	cg14525407,cg25837909,cg17207590	chr15:63569612-63570581	1-06506,1-04466	2	cg08304887,cg16586192,cg10140728,cg09264088,cg26206990,cg19574017,cg01222408,cg09444664,cg14525407,cg25837909,cg17207590
chr15	65677340	65677354	65677348	CTCF	1-05153	cg06829366,cg08182270,cg23671997	chr15:65677376-65678370	1-05153,1-01989	2	cg06829366,cg08182270,cg23671997,cg01652914,cg14208757,cg06301449
chr15	65677340	65677354	65677352	CTCF	1-01989	cg06829366,cg08182270,cg23671997	chr15:65677376-65678370	1-05153,1-01989	2	cg06829366,cg08182270,cg23671997,cg01652914,cg14208757,cg06301449
chr15	65677342	65677362	65677348	UAK25	1-05153	cg06829366,cg08182270,cg23671997	chr15:65677376-65678370	1-05153,1-01989	2	cg06829366,cg08182270,cg23671997,cg01652914,cg14208757,cg06301449
chr15	65677342	65677362	65677352	UAK25	1-01989	cg06829366,cg08182270,cg23671997	chr15:65677376-65678370	1-05153,1-01989	2	cg06829366,cg08182270,cg23671997,cg01652914,cg14208757,cg06301449
chr15	65677344	65677354	65677348	UAK27	1-05153	cg06829366,cg08182270,cg23671997	chr15:65677376-65678370	1-05153,1-01989	2	cg06829366,cg08182270,cg23671997,cg01652914,cg14208757,cg06301449
chr15	65677344	65677354	65677352	UAK27	1-01989	cg06829366,cg08182270,cg23671997	chr15:65677376-65678370	1-05153,1-01989	2	cg06829366,cg08182270,cg23671997,cg01652914,cg14208757,cg06301449
chr15	65677346	65677356	65677348	UAK26	1-05153	cg06829366,cg08182270,cg23671997	chr15:65677376-65678370	1-05153,1-01989	2	cg06829366,cg08182270,cg23671997,cg01652914,cg14208757,cg06301449
chr15	65677346	65677356	65677352	UAK26	1-01989	cg06829366,cg08182270,cg23671997	chr15:65677376-65678370	1-05153,1-01989	2	cg06829366,cg08182270,cg23671997,cg01652914,cg14208757,cg06301449
chr15	70740353	70740367	70740363	UA3	1-05174	cg19580937,cg11353598,cg12434747	chr15:70740428-70740471	1-05174	1	cg19580937,cg11353598,cg12434747
chr15	72978418	72978439	72978434	EGR1	1-04540	cg00398637,cg12188424,cg25924688,cg11658652	chr15:72977751-72978758	1-00034,1-04719,1-02874,1-02876,1-06321,1-03538,1-03639,1-03665,1-03991,1-01577,1-01869,1-06506,1-02408,1-04540,1-04624	15	cg00398637,cg12188424,cg25924688,cg11658652,cg20727290,cg25996835,cg13734221,cg20354502,cg21965820,cg00771574,cg05013483,cg11354991,cg08908331,cg05637795,cg25519609
chr15	75018807	75018821	75018817	SP1	1-05946	cg00213123,cg05549655,cg13570656,cg12101586,cg22549041,cg18092474	chr15:75018199-75020203	1-02917,1-05673,1-06321,1-00876,1-03639,1-01218,1-03996,1-06506,1-04333,1-04523,1-05946,1-00913,1-03842,1-03846,1-01989,1-00347,1-00770,1-04782,1-00818,1-01075,1-02331,1-00667,1-04774,1-03258,1-06498,1-00894,1-01017,1-03825,1-02425	29	cg09611756,cg18723873,cg27426425,cg12925764,cg05010179,cg10481417,cg13027682,cg20433014,cg19817399,cg26704579,cg19889264,cg01919118,cg27051335,cg03797501,cg20004910,cg00213123,cg23727072,cg05549655,cg17852385,cg13570656,cg12101586,cg22549041,cg11924019,cg18092474,cg26516004,cg06581475
chr15	75018811	75018830	75018817	UAK42	1-05946	cg00213123,cg05549655,cg13570656,cg12101586,cg22549041,cg18092474	chr15:75018199-75020203	1-02917,1-05673,1-06321,1-00876,1-03639,1-01218,1-03996,1-06506,1-04333,1-04523,1-05946,1-00913,1-03842,1-03846,1-01989,1-00347,1-00770,1-04782,1-00818,1-01075,1-02331,1-00667,1-04774,1-03258,1-06498,1-00894,1-01017,1-03825,1-02425	29	cg09611756,cg18723873,cg27426425,cg12925764,cg05010179,cg10481417,cg13027682,cg20433014,cg19817399,cg26704579,cg19889264,cg01919118,cg27051335,cg03797501,cg20004910,cg00213123,cg23727072,cg05549655,cg17852385,cg13570656,cg12101586,cg22549041,cg11924019,cg18092474,cg26516004,cg06581475
chr15	75018815	75018825	75018817	TCF3	1-05946	cg00213123,cg05549655,cg13570656,cg12101586,cg22549041,cg18092474	chr15:75018199-75020203	1-02917,1-05673,1-06321,1-00876,1-03639,1-01218,1-03996,1-06506,1-04333,1-04523,1-05946,1-00913,1-03842,1-03846,1-01989,1-00347,1-00770,1-04782,1-00818,1-01075,1-02331,1-00667,1-04774,1-03258,1-06498,1-00894,1-01017,1-03825,1-02425	29	cg09611756,cg18723873,cg27426425,cg12925764,cg05010179,cg10481417,cg13027682,cg20433014,cg19817399,cg26704579,cg19889264,cg01919118,cg27051335,cg03797501,cg20004910,cg00213123,cg23727072,cg05549655,cg17852385,cg13570656,cg12101586,cg22549041,cg11924019,cg18092474,cg26516004,cg06581475
chr15	78933592	78933609	78933600	UAK33	1-07026	cg24369989,cg21402071	chr15:78933105-78934581	1-01306,1-07026,1-02918,1-04071,1-02413	5	cg27554782,cg20039407,cg06270244,cg04460984,cg27202210,cg24369989,cg17179314,cg21402071,cg20511832,cg16032438,cg16404074
chr15	83332070	83332090	83332077	REST	1-00982	cg19175742,cg20592391	chr15:83331440-83332088	1-00982	1	cg06459070,cg19175742,cg18253757,cg25584930,cg20592391
chr15	90345856	90345870	90345870	v-JUN	1-04367	cg06344992,cg02008229,cg23432008	chr15:90345998-90346924	1-00174,1-00304,1-00423,1-00801,1-05675,1-05999,1-00914,1-03665,1-04071,1-02024,1-06506,1-06537,1-04367,1-05420	14	cg06344992,cg02008229,cg23432008,cg19145002,cg16887333
chr15	91416374	91416388	91416374	UAK28	1-02097	cg05466844,cg23662846,cg07162861,cg10698959	chr15:91415531-91416119	1-04865,1-04893,1-04095,1-02097,1-04460,1-04465,1-04466,1-02413,1-04588	9	cg18274515,cg05466844,cg23662846,cg07162861,cg12722937,cg10698959,cg00207731
chr15	91473385	91473407	91473398	ZNF143	1-01017	cg08939371,cg18724928,cg18472881,cg17046295,cg03291024,cg01351822,cg16414568,cg08551047	chr15:91473058-91474457	1-00157,1-04782,1-05726,1-01017,1-03676,1-01174,1-06537,1-06690,1-02413,1-07386,1-07419	11	cg08939371,cg18724928,cg18472881,cg17046295,cg03291024,cg13778201,cg08267442,cg01351822,cg16414568,cg08551047,cg20750528
chr15	91473389	91473403	91473398	STAT1	1-01017	cg08939371,cg18724928,cg18472881,cg17046295,cg03291024,cg01351822,cg16414568,cg08551047	chr15:91473058-91474457	1-00157,1-04782,1-05726,1-01017,1-03676,1-01174,1-06537,1-06690,1-02413,1-07386,1-07419	11	cg08939371,cg18724928,cg18472881,cg17046295,cg03291024,cg13778201,cg08267442,cg01351822,cg16414568,cg08551047,cg20750528
chr15	91473394	91473404	91473398	ELF1	1-01017	cg08939371,cg18724928,cg18472881,cg17046295,cg03291024,cg01351822,cg16414568,cg08551047	chr15:91473058-91474457	1-00157,1-04782,1-05726,1-01017,1-03676,1-01174,1-06537,1-06690,1-02413,1-07386,1-07419	11	cg08939371,cg18724928,cg18472881,cg17046295,cg03291024,cg13778201,cg08267442,cg01351822,cg16414568,cg08551047,cg20750528
chr15	91473394	91473404	91473398	ELK4	1-01017	cg08939371,cg18724928,cg18472881,cg17046295,cg03291024,cg01351822,cg16414568,cg08551047	chr15:91473058-91474457	1-00157,1-04782,1-05726,1-01017,1-03676,1-01174,1-06537,1-06690,1-02413,1-07386,1-07419	11	cg08939371,cg18724928,cg18472881,cg17046295,cg03291024,cg13778201,cg08267442,cg01351822,cg16414568,cg08551047,cg20750528
chr15	91473394	91473404	91473398	GABP	1-01017	cg08939371,cg18724928,cg18472881,cg17046295,cg03291024,cg01351822,cg16414568,cg08551047	chr15:91473058-91474457	1-00157,1-04782,1-05726,1-01017,1-03676,1-01174,1-06537,1-06690,1-02413,1-07386,1-07419	11	cg08939371,cg18724928,cg18472881,cg17046295,cg03291024,cg13778201,cg08267442,cg01351822,cg16414568,cg08551047,cg20750528
chr15	91473395	91473402	91473398	ELF	1-01017	cg08939371,cg18724928,cg18472881,cg17046295,cg03291024,cg01351822,cg16414568,cg08551047	chr15:91473058-91474457	1-00157,1-04782,1-05726,1-01017,1-03676,1-01174,1-06537,1-06690,1-02413,1-07386,1-07419	11	cg08939371,cg18724928,cg18472881,cg17046295,cg03291024,cg13778201,cg08267442,cg01351822,cg16414568,cg08551047,cg20750528
chr16	420233	420247	420245	UA3	1-05911	cg00101154,cg12437481,cg08923669	chr16:419799-421050	1-00041,1-00080,1-00112,1-00400,1-00667,1-00702,1-04693,1-04835,1-04855,1-02987,1-00655,1-03393,1-05726,1-05911,1-06204,1-00825,1-00876,1-03639,1-01218,1-04113,1-01256,1-01984,1-02290,1-04270,1-04380,1-02324,1-02411,1-02491,1-07555,1-04465	30	cg00928191,cg11173014,cg26913058,cg00101154,cg12437481,cg08923669,cg17422692,cg08296601,cg19782233,cg09226044,cg01446963,cg06105288,cg09504571,cg26944245
chr16	420561	420575	420575	NFY	1-00112	cg26913058,cg12437481,cg08923669,cg01446963,cg09504571	chr16:419799-421050	1-00041,1-00080,1-00112,1-00400,1-00667,1-00702,1-04693,1-04835,1-04855,1-02987,1-00655,1-03393,1-05726,1-05911,1-06204,1-00825,1-00876,1-03639,1-01218,1-04113,1-01256,1-01984,1-02290,1-04270,1-04380,1-02324,1-02411,1-02491,1-07555,1-04465	30	cg00928191,cg11173014,cg26913058,cg00101154,cg12437481,cg08923669,cg17422692,cg08296601,cg19782233,cg09226044,cg01446963,cg06105288,cg09504571,cg26944245
chr16	420567	420590	420575	NFY-UA2	1-00112	cg26913058,cg12437481,cg08923669,cg01446963,cg09504571	chr16:419799-421050	1-00041,1-00080,1-00112,1-00400,1-00667,1-00702,1-04693,1-04835,1-04855,1-02987,1-00655,1-03393,1-05726,1-05911,1-06204,1-00825,1-00876,1-03639,1-01218,1-04113,1-01256,1-01984,1-02290,1-04270,1-04380,1-02324,1-02411,1-02491,1-07555,1-04465	30	cg00928191,cg11173014,cg26913058,cg00101154,cg12437481,cg08923669,cg17422692,cg08296601,cg19782233,cg09226044,cg01446963,cg06105288,cg09504571,cg26944245
chr16	420710	420724	420720	UAK42	1-07555	cg00101154,cg08923669,cg01446963	chr16:419799-421050	1-00041,1-00080,1-00112,1-00400,1-00667,1-00702,1-04693,1-04835,1-04855,1-02987,1-00655,1-03393,1-05726,1-05911,1-06204,1-00825,1-00876,1-03639,1-01218,1-04113,1-01256,1-01984,1-02290,1-04270,1-04380,1-02324,1-02411,1-02491,1-07555,1-04465	30	cg00928191,cg11173014,cg26913058,cg00101154,cg12437481,cg08923669,cg17422692,cg08296601,cg19782233,cg09226044,cg01446963,cg06105288,cg09504571,cg26944245
chr16	420714	420728	420720	SP1	1-07555	cg00101154,cg08923669,cg01446963	chr16:419799-421050	1-00041,1-00080,1-00112,1-00400,1-00667,1-00702,1-04693,1-04835,1-04855,1-02987,1-00655,1-03393,1-05726,1-05911,1-06204,1-00825,1-00876,1-03639,1-01218,1-04113,1-01256,1-01984,1-02290,1-04270,1-04380,1-02324,1-02411,1-02491,1-07555,1-04465	30	cg00928191,cg11173014,cg26913058,cg00101154,cg12437481,cg08923669,cg17422692,cg08296601,cg19782233,cg09226044,cg01446963,cg06105288,cg09504571,cg26944245
chr16	597244	597258	597257	ZNF263	1-04893	cg25692362,cg05386400,cg04076387	chr16:595485-597435	1-04299,1-07593,1-04893,1-06248,1-04465	5	cg08442550,cg03849755,cg03140557,cg09077332,cg13113599,cg03614373,cg02278319,cg26582098,cg25692362,cg05386400,cg04076387
chr16	597245	597259	597257	SP1	1-04893	cg25692362,cg05386400,cg04076387	chr16:595485-597435	1-04299,1-07593,1-04893,1-06248,1-04465	5	cg08442550,cg03849755,cg03140557,cg09077332,cg13113599,cg03614373,cg02278319,cg26582098,cg25692362,cg05386400,cg04076387
chr16	686320	686340	686324	UAK17	1-04911	cg04636834,cg20319926,cg16757281	chr16:685579-686553	1-04911,1-06506	2	cg04636834,cg20319926,cg16757281,cg07692169,cg27430053,cg11169286,cg12635807,cg13359852,cg08810813,cg03171263
chr16	745305	745319	745315	UAK42	1-03038	cg01195246,cg02713960,cg17997138,cg27116253,cg02387244	chr16:742694-746133	1-02544,1-02959,1-05977,1-00914,1-06506,1-02413,1-04655,1-02918,1-00808,1-03652,1-00080,1-02917,1-03038,1-00854,1-00652,1-06321	16	cg12064480,cg06639267,cg05673214,cg01552128,cg22271663,cg05542681,cg03349020,cg04005677,cg18740273,cg15675238,cg18343194,cg01003448,cg07482202,cg01195246,cg02713960,cg17997138,cg27116253,cg02387244
chr16	745305	745319	745316	UAK42	1-03038	cg01195246,cg02713960,cg17997138,cg27116253,cg02387244	chr16:742694-746133	1-02544,1-02959,1-05977,1-00914,1-06506,1-02413,1-04655,1-02918,1-00808,1-03652,1-00080,1-02917,1-03038,1-00854,1-00652,1-06321	16	cg12064480,cg06639267,cg05673214,cg01552128,cg22271663,cg05542681,cg03349020,cg04005677,cg18740273,cg15675238,cg18343194,cg01003448,cg07482202,cg01195246,cg02713960,cg17997138,cg27116253,cg02387244
chr16	745313	745332	745315	E2F4	1-03038	cg01195246,cg02713960,cg17997138,cg27116253,cg02387244	chr16:742694-746133	1-02544,1-02959,1-05977,1-00914,1-06506,1-02413,1-04655,1-02918,1-00808,1-03652,1-00080,1-02917,1-03038,1-00854,1-00652,1-06321	16	cg12064480,cg06639267,cg05673214,cg01552128,cg22271663,cg05542681,cg03349020,cg04005677,cg18740273,cg15675238,cg18343194,cg01003448,cg07482202,cg01195246,cg02713960,cg17997138,cg27116253,cg02387244
chr16	745313	745332	745316	E2F4	1-03038	cg01195246,cg02713960,cg17997138,cg27116253,cg02387244	chr16:742694-746133	1-02544,1-02959,1-05977,1-00914,1-06506,1-02413,1-04655,1-02918,1-00808,1-03652,1-00080,1-02917,1-03038,1-00854,1-00652,1-06321	16	cg12064480,cg06639267,cg05673214,cg01552128,cg22271663,cg05542681,cg03349020,cg04005677,cg18740273,cg15675238,cg18343194,cg01003448,cg07482202,cg01195246,cg02713960,cg17997138,cg27116253,cg02387244
chr16	745314	745324	745315	ELF1	1-03038	cg01195246,cg02713960,cg17997138,cg27116253,cg02387244	chr16:742694-746133	1-02544,1-02959,1-05977,1-00914,1-06506,1-02413,1-04655,1-02918,1-00808,1-03652,1-00080,1-02917,1-03038,1-00854,1-00652,1-06321	16	cg12064480,cg06639267,cg05673214,cg01552128,cg22271663,cg05542681,cg03349020,cg04005677,cg18740273,cg15675238,cg18343194,cg01003448,cg07482202,cg01195246,cg02713960,cg17997138,cg27116253,cg02387244
chr16	745314	745324	745316	ELF1	1-03038	cg01195246,cg02713960,cg17997138,cg27116253,cg02387244	chr16:742694-746133	1-02544,1-02959,1-05977,1-00914,1-06506,1-02413,1-04655,1-02918,1-00808,1-03652,1-00080,1-02917,1-03038,1-00854,1-00652,1-06321	16	cg12064480,cg06639267,cg05673214,cg01552128,cg22271663,cg05542681,cg03349020,cg04005677,cg18740273,cg15675238,cg18343194,cg01003448,cg07482202,cg01195246,cg02713960,cg17997138,cg27116253,cg02387244
chr16	857767	857786	857771	E2F4	1-05635	cg06531573,cg14223671,cg08395793	chr16:857453-858834	1-00112,1-00390,1-05009,1-02627,1-02786,1-02917,1-03038,1-00625,1-00655,1-03394,1-03437,1-03627,1-01238,1-01384,1-02183,1-06506,1-04367,1-05635	18	cg02407415,cg06531573,cg03749207,cg14223671,cg08395793,cg03619075,cg20814213
chr16	857821	857831	857823	UAK35	1-01238	cg14223671,cg08395793	chr16:857453-858834	1-00112,1-00390,1-05009,1-02627,1-02786,1-02917,1-03038,1-00625,1-00655,1-03394,1-03437,1-03627,1-01238,1-01384,1-02183,1-06506,1-04367,1-05635	18	cg02407415,cg06531573,cg03749207,cg14223671,cg08395793,cg03619075,cg20814213
chr16	857822	857832	857823	ETS1	1-01238	cg14223671,cg08395793	chr16:857453-858834	1-00112,1-00390,1-05009,1-02627,1-02786,1-02917,1-03038,1-00625,1-00655,1-03394,1-03437,1-03627,1-01238,1-01384,1-02183,1-06506,1-04367,1-05635	18	cg02407415,cg06531573,cg03749207,cg14223671,cg08395793,cg03619075,cg20814213
chr16	1048664	1048678	1048666	CTCF	1-05420	cg13811379,cg17206212,cg11978890	chr16:1047459-1048984	1-00041,1-04865,1-04870,1-03159,1-03190,1-03393,1-05673,1-05726,1-01190,1-03897,1-03972,1-04071,1-01242,1-01256,1-01260,1-01306,1-01869,1-02234,1-06643,1-04380,1-04389,1-02413,1-05420,1-07419	24	cg01781725,cg03568041,cg08977639,cg13811379,cg17206212,cg11978890,cg19428589,cg17978486,cg07373304
chr16	1128883	1128897	1128894	UAK42	1-00389	cg06314202	chr16:1127791-1133379	1-02959,1-00625,1-03825,1-01238,1-06506,1-04523,1-04624,1-00894,1-05613,1-06321,1-04774,1-00389,1-04870,1-05124,1-02544	15	cg09123155,cg07686916,cg06314202,cg13194088,cg17559543,cg19209587,cg24433189,cg06422039,cg03839161,cg00610310,cg04168474,cg15647480,cg01953240,cg07089275,cg12689608,cg08039952,cg09358961,cg05473536,cg27127090,cg07336438,cg03323597,cg08259514,cg03259564,cg26742187,cg18042038,cg03327829,cg05693331,cg10259231,cg05433490,cg06710672
chr16	1351068	1351082	1351070	CTCF	1-00304	cg05090127,cg02294280,cg04970847	chr16:1350657-1351307	1-00304,1-04782	2	cg12480885,cg05090127,cg02294280,cg04970847
chr16	1351068	1351082	1351070	CTCF	1-04782	cg05090127,cg02294280,cg04970847	chr16:1350657-1351307	1-00304,1-04782	2	cg12480885,cg05090127,cg02294280,cg04970847
chr16	1351070	1351084	1351070	UA3	1-00304	cg05090127,cg02294280,cg04970847	chr16:1350657-1351307	1-00304,1-04782	2	cg12480885,cg05090127,cg02294280,cg04970847
chr16	1351070	1351084	1351070	UA3	1-04782	cg05090127,cg02294280,cg04970847	chr16:1350657-1351307	1-00304,1-04782	2	cg12480885,cg05090127,cg02294280,cg04970847
chr16	1351070	1351090	1351070	UAK25	1-00304	cg05090127,cg02294280,cg04970847	chr16:1350657-1351307	1-00304,1-04782	2	cg12480885,cg05090127,cg02294280,cg04970847
chr16	1351070	1351090	1351070	UAK25	1-04782	cg05090127,cg02294280,cg04970847	chr16:1350657-1351307	1-00304,1-04782	2	cg12480885,cg05090127,cg02294280,cg04970847
chr16	1578320	1578327	1578323	UAK20	1-05597	cg20664117,cg17651247,cg10302347,cg24076301,cg06792310,cg13812840	chr16:1577915-1578808	1-00034,1-00667,1-04782,1-04920,1-05093,1-03298,1-03422,1-03538,1-03627,1-01984,1-02097,1-04299,1-07084,1-05597	14	cg20664117,cg17651247,cg10302347,cg24076301,cg22212572,cg06792310,cg13812840,cg13767393,cg05308792
chr16	1578372	1578379	1578375	UAK20	1-03422	cg20664117,cg17651247,cg10302347,cg24076301,cg06792310	chr16:1577915-1578808	1-00034,1-00667,1-04782,1-04920,1-05093,1-03298,1-03422,1-03538,1-03627,1-01984,1-02097,1-04299,1-07084,1-05597	14	cg20664117,cg17651247,cg10302347,cg24076301,cg22212572,cg06792310,cg13812840,cg13767393,cg05308792
chr16	1820602	1820616	1820602	ZNF263	1-04920	cg06326493,cg10471544,cg08640252	chr16:1820311-1821254	1-04865,1-04920,1-06988	3	cg06326493,cg10471544,cg08640252,cg03293513
chr16	2867266	2867283	2867282	CREB-ext	1-04782	cg05635274,cg02296564,cg10765147,cg22730830,cg01232511,cg12257502,cg07280731,cg18786718	chr16:2866453-2868002	1-00071,1-00508,1-04782,1-04926,1-00655,1-06321,1-00856,1-03627,1-03676,1-03846,1-02260,1-06506,1-04540,1-00797,1-02917,1-00652,1-01017,1-01238,1-07004,1-07026	20	cg01976002,cg13198500,cg05635274,cg02296564,cg10765147,cg22730830,cg01232511,cg12257502,cg07280731,cg18786718
chr16	2867269	2867287	2867282	E2F1	1-04782	cg05635274,cg02296564,cg10765147,cg22730830,cg01232511,cg12257502,cg07280731,cg18786718	chr16:2866453-2868002	1-00071,1-00508,1-04782,1-04926,1-00655,1-06321,1-00856,1-03627,1-03676,1-03846,1-02260,1-06506,1-04540,1-00797,1-02917,1-00652,1-01017,1-01238,1-07004,1-07026	20	cg01976002,cg13198500,cg05635274,cg02296564,cg10765147,cg22730830,cg01232511,cg12257502,cg07280731,cg18786718
chr16	2867271	2867285	2867282	NRF1	1-04782	cg05635274,cg02296564,cg10765147,cg22730830,cg01232511,cg12257502,cg07280731,cg18786718	chr16:2866453-2868002	1-00071,1-00508,1-04782,1-04926,1-00655,1-06321,1-00856,1-03627,1-03676,1-03846,1-02260,1-06506,1-04540,1-00797,1-02917,1-00652,1-01017,1-01238,1-07004,1-07026	20	cg01976002,cg13198500,cg05635274,cg02296564,cg10765147,cg22730830,cg01232511,cg12257502,cg07280731,cg18786718
chr16	2867281	2867295	2867282	CTCF-ext	1-04782	cg05635274,cg02296564,cg10765147,cg22730830,cg01232511,cg12257502,cg07280731,cg18786718	chr16:2866453-2868002	1-00071,1-00508,1-04782,1-04926,1-00655,1-06321,1-00856,1-03627,1-03676,1-03846,1-02260,1-06506,1-04540,1-00797,1-02917,1-00652,1-01017,1-01238,1-07004,1-07026	20	cg01976002,cg13198500,cg05635274,cg02296564,cg10765147,cg22730830,cg01232511,cg12257502,cg07280731,cg18786718
chr16	3018802	3018823	3018819	EGR1	1-04333	cg26077229,cg01461733,cg02723225	chr16:3017494-3019193	1-00157,1-00423,1-02627,1-02544,1-06321,1-01238,1-06506,1-04333,1-04472,1-07084,1-03374	11	cg26494929,cg03927304,cg26077229,cg05169951,cg09660145,cg26229224,cg01461733,cg05097643,cg06103394,cg26903090,cg07135157,cg27446273,cg18715214,cg25358865,cg18410226,cg02723225
chr16	3415092	3415102	3415098	ELF1	1-04512	cg26882454,cg26559606,cg02898051	chr16:3414564-3416071	1-05124,1-03394,1-01049,1-01577,1-01869,1-04512	6	cg06904975,cg26882454,cg26559606,cg27295850,cg02898051,cg06980800,cg07388216,cg05396671
chr16	3415092	3415102	3415098	GABP	1-04512	cg26882454,cg26559606,cg02898051	chr16:3414564-3416071	1-05124,1-03394,1-01049,1-01577,1-01869,1-04512	6	cg06904975,cg26882454,cg26559606,cg27295850,cg02898051,cg06980800,cg07388216,cg05396671
chr16	3415094	3415101	3415098	ELF	1-04512	cg26882454,cg26559606,cg02898051	chr16:3414564-3416071	1-05124,1-03394,1-01049,1-01577,1-01869,1-04512	6	cg06904975,cg26882454,cg26559606,cg27295850,cg02898051,cg06980800,cg07388216,cg05396671
chr16	3415094	3415104	3415098	UAK35	1-04512	cg26882454,cg26559606,cg02898051	chr16:3414564-3416071	1-05124,1-03394,1-01049,1-01577,1-01869,1-04512	6	cg06904975,cg26882454,cg26559606,cg27295850,cg02898051,cg06980800,cg07388216,cg05396671
chr16	3415096	3415110	3415098	ZNF143	1-04512	cg26882454,cg26559606,cg02898051	chr16:3414564-3416071	1-05124,1-03394,1-01049,1-01577,1-01869,1-04512	6	cg06904975,cg26882454,cg26559606,cg27295850,cg02898051,cg06980800,cg07388216,cg05396671
chr16	3551167	3551181	3551170	AP2	1-00808	cg05671386	chr16:3549810-3551335	1-00174,1-04870,1-03038,1-00808,1-01238,1-04389,1-07593,1-00389	8	cg12337857,cg03949642,cg08521777,cg05671386,cg02189477,cg27559562,cg00990974,cg07240673,cg02073511,cg02583271,cg02566698,cg02379764,cg06084907,cg08562243,cg11720818,cg10456069,cg11092441
chr16	8960390	8960409	8960403	SP1	1-04624	cg02349264,cg07692489,cg21306072,cg20544307,cg00040278,cg09760217	chr16:8960832-8962247	1-00150,1-00761,1-04652,1-04911,1-04926,1-05007,1-02812,1-02876,1-05846,1-06370,1-03676,1-01218,1-01306,1-01577,1-04190,1-07004,1-04540,1-04624,1-09064	19	cg02349264,cg07692489,cg21306072,cg20544307,cg00040278,cg09760217,cg09196386,cg11638716,cg03917077,cg16581360,cg25563616,cg07708806,cg19848399
chr16	11877543	11877557	11877549	PU1	1-03538	cg02535219,cg10406027,cg02520087	chr16:11876110-11877213	1-05443,1-05911,1-03538,1-03897,1-04071,1-01242,1-02234	7	cg08160706,cg04010868,cg14959707,cg26521448,cg22690773,cg07378778,cg02535219,cg10406027,cg02520087
chr16	11877549	11877563	11877549	NFKB1	1-03538	cg02535219,cg10406027,cg02520087	chr16:11876110-11877213	1-05443,1-05911,1-03538,1-03897,1-04071,1-01242,1-02234	7	cg08160706,cg04010868,cg14959707,cg26521448,cg22690773,cg07378778,cg02535219,cg10406027,cg02520087
chr16	29833162	29833176	29833163	NR3C1	1-02918	cg15777760,cg06221746,cg08951931,cg09918713	chr16:29831675-29833154	1-11800,1-02918,1-02959,1-02963,1-05675,1-05888,1-00808,1-01019,1-01174,1-03825,1-04112,1-01242,1-01306,1-02234,1-04270,1-04389,1-04460,1-05420,1-05597,1-05613,1-03472,1-03652,1-06643,1-05443	24	cg13906968,cg22055860,cg23911932,cg15777760,cg06221746,cg08951931,cg09918713,cg01802062
chr16	31484231	31484245	31484237	CTCF	1-00112	cg10995380,cg01775612,cg23009571,cg23856437	chr16:31483386-31484723	1-00112,1-05124	2	cg24318012,cg19609456,cg00643111,cg02417684,cg06214241,cg10995380,cg01775612,cg23009571,cg23856437,cg08619455,cg03526468,cg23910243,cg11215870
chr16	31484233	31484253	31484237	UAK25	1-00112	cg10995380,cg01775612,cg23009571,cg23856437	chr16:31483386-31484723	1-00112,1-05124	2	cg24318012,cg19609456,cg00643111,cg02417684,cg06214241,cg10995380,cg01775612,cg23009571,cg23856437,cg08619455,cg03526468,cg23910243,cg11215870
chr16	31484235	31484245	31484237	UAK27	1-00112	cg10995380,cg01775612,cg23009571,cg23856437	chr16:31483386-31484723	1-00112,1-05124	2	cg24318012,cg19609456,cg00643111,cg02417684,cg06214241,cg10995380,cg01775612,cg23009571,cg23856437,cg08619455,cg03526468,cg23910243,cg11215870
chr16	48643659	48643680	48643677	EGR1	1-01017	cg04834502,cg05079544,cg04672837	chr16:48643812-48645052	1-01017,1-04333	2	cg06642941,cg27470012,cg16419098,cg07267515,cg04721812,cg23810424,cg01212978,cg03013259,cg17345633,cg04834502,cg05079544,cg04672837,cg12989104
chr16	56553873	56553887	56553875	CTCF	1-03059	cg07280206,cg21896567,cg00876127	chr16:56553360-56555187	1-04782,1-05007,1-02874,1-03059,1-00652,1-00818,1-03639,1-01218,1-01304,1-06506	10	cg06249486,cg13097319,cg09278656,cg06655377,cg09156115,cg05797538,cg15535221,cg11558102,cg25949858,cg22668672,cg07280206,cg03885664,cg21896567,cg00876127,cg07236532
chr16	67189381	67189396	67189382	PAX5	1-00389	cg05976840,cg03213259,cg01151995	chr16:67189628-67190540	1-00389,1-04926,1-02959,1-03159,1-04056,1-04112,1-02234,1-04389	8	cg01961069,cg05976840,cg03213259,cg01151995,cg11219611,cg01629940
chr16	68482110	68482124	68482121	CTCF	1-00739	cg07461772,cg10426893,cg06106242,cg19297232	chr16:68481048-68483195	1-02627,1-01306,1-06506,1-04624,1-00739,1-01577	6	cg04464276,cg05948940,cg10556064,cg05144928,cg12136772,cg22116290,cg05676789,cg23758485,cg16694003,cg26013099,cg03412735,cg08694014,cg20473025,cg15201635,cg09202227,cg07461772,cg10426893,cg06106242,cg19297232,cg17217677
chr16	68482110	68482124	68482121	CTCF	1-01306	cg05948940,cg05144928,cg12136772,cg07461772,cg10426893,cg19297232	chr16:68481048-68483195	1-02627,1-01306,1-06506,1-04624,1-00739,1-01577	6	cg04464276,cg05948940,cg10556064,cg05144928,cg12136772,cg22116290,cg05676789,cg23758485,cg16694003,cg26013099,cg03412735,cg08694014,cg20473025,cg15201635,cg09202227,cg07461772,cg10426893,cg06106242,cg19297232,cg17217677
chr16	75467810	75467826	75467823	FOXA	1-04512	cg10425698,cg00770784,cg03011941	chr16:75467373-75468319	1-00739,1-04921,1-05009,1-05673,1-05888,1-04512	6	cg27005053,cg26043959,cg11231977,cg10765567,cg08575387,cg07060117,cg04262197,cg03993687,cg02172824,cg10425698,cg00770784,cg03011941
chr16	77755939	77755952	77755945	MAX	1-01989	cg09765964,cg09895527,cg24471612,cg12335422,cg03385846	chr16:77755943-77756762	1-01989,1-04190,1-06506,1-05613	4	cg16183492,cg09765964,cg09895527,cg24471612,cg15581268,cg19152365,cg21964055,cg17359622,cg09480307,cg03545515,cg12335422,cg03385846,cg09319671,cg09975406
chr16	85157798	85157814	85157814	v-Maf	1-01260	cg07842521,cg06925882,cg04622164,cg01511806	chr16:85157761-85158803	1-01260	1	cg07842521,cg06925882,cg04622164,cg01511806,cg22451185
chr16	85157813	85157823	85157814	ETS1	1-01260	cg07842521,cg06925882,cg04622164,cg01511806	chr16:85157761-85158803	1-01260	1	cg07842521,cg06925882,cg04622164,cg01511806,cg22451185
chr16	87887344	87887358	87887355	GATA3	1-03639	cg26982544,cg08401758,cg06867910	chr16:87886870-87887505	1-06370,1-00876,1-03639,1-01238,1-04466	5	cg26529851,cg26569315,cg27560818,cg26982544,cg08401758,cg06867910
chr16	87887346	87887359	87887355	CEBPB	1-03639	cg26982544,cg08401758,cg06867910	chr16:87886870-87887505	1-06370,1-00876,1-03639,1-01238,1-04466	5	cg26529851,cg26569315,cg27560818,cg26982544,cg08401758,cg06867910
chr16	87887346	87887360	87887355	v-JUN	1-03639	cg26982544,cg08401758,cg06867910	chr16:87886870-87887505	1-06370,1-00876,1-03639,1-01238,1-04466	5	cg26529851,cg26569315,cg27560818,cg26982544,cg08401758,cg06867910
chr16	87887347	87887357	87887355	CREB	1-03639	cg26982544,cg08401758,cg06867910	chr16:87886870-87887505	1-06370,1-00876,1-03639,1-01238,1-04466	5	cg26529851,cg26569315,cg27560818,cg26982544,cg08401758,cg06867910
chr16	87993174	87993188	87993184	NRF1	1-02491	cg20611109,cg21554095,cg01357591,cg17741178	chr16:87992456-87993549	1-04782,1-04893,1-05009,1-05360,1-02874,1-05926,1-00874,1-06643,1-04466,1-02491,1-04920,1-06370,1-04095,1-09064	14	cg17487543,cg00437864,cg17139114,cg19007952,cg17237927,cg20611109,cg21554095,cg01357591,cg17741178
chr16	89574512	89574533	89574530	EGR1	1-03534	cg07924503,cg14842600,cg02244288	chr16:89572933-89574616	1-05977,1-03534	2	cg12032923,cg15206445,cg09560549,cg07924503,cg14842600,cg02244288,cg08897854,cg06640241,cg16475925,cg05671791
chr16	89574514	89574533	89574530	E2F4	1-03534	cg07924503,cg14842600,cg02244288	chr16:89572933-89574616	1-05977,1-03534	2	cg12032923,cg15206445,cg09560549,cg07924503,cg14842600,cg02244288,cg08897854,cg06640241,cg16475925,cg05671791
chr17	171042	171062	171055	SP1	1-01805	cg26545997,cg17780867,cg18290190	chr17:170072-172160	1-00046,1-00174,1-00508,1-00517,1-00702,1-04782,1-00610,1-00655,1-05675,1-05888,1-05911,1-00808,1-03676,1-04112,1-02234,1-02260,1-06988,1-04389,1-00312,1-04774,1-05009,1-05093,1-02652,1-03190,1-05999,1-01805,1-05437,1-00818,1-06506,1-03627	30	cg26545997,cg20530515,cg20652871,cg01875057,cg15809575,cg12742645,cg01282504,cg17780867,cg21909751,cg05231332,cg18290190,cg01760178,cg21518212,cg26730036
chr17	406277	406291	406288	YY1	1-00702	cg18727120,cg00416177,cg04370829,cg16835101,cg20547929,cg00430613,cg01214346	chr17:406136-406502	1-00046,1-00319,1-00389,1-00702,1-04652,1-04655,1-04975,1-02627,1-02841,1-02918,1-03038,1-03059,1-00610,1-03298,1-05673,1-06401,1-00825,1-03538,1-03846,1-03894,1-01238,1-07026,1-04333,1-04460,1-02411,1-04624,1-09064	27	cg18727120,cg00416177,cg04370829,cg16835101,cg20547929,cg00430613,cg01214346
chr17	406281	406291	406288	ELF1	1-00702	cg18727120,cg00416177,cg04370829,cg16835101,cg20547929,cg00430613,cg01214346	chr17:406136-406502	1-00046,1-00319,1-00389,1-00702,1-04652,1-04655,1-04975,1-02627,1-02841,1-02918,1-03038,1-03059,1-00610,1-03298,1-05673,1-06401,1-00825,1-03538,1-03846,1-03894,1-01238,1-07026,1-04333,1-04460,1-02411,1-04624,1-09064	27	cg18727120,cg00416177,cg04370829,cg16835101,cg20547929,cg00430613,cg01214346
chr17	1617922	1617936	1617929	UAK42	1-05009	cg17457912,cg26697882,cg00956971	chr17:1616634-1617376	1-04893,1-04920,1-05009,1-05093,1-02987,1-03001,1-07026	7	cg02308706,cg17457912,cg26697882,cg00956971
chr17	2952192	2952202	2952196	TCF3	1-06321	cg11684897,cg02046423,cg24015889,cg04037236	chr17:2951665-2952534	1-02963,1-06321,1-00894	3	cg11684897,cg02046423,cg24015889,cg04037236,cg22104261,cg12895747,cg24548754,cg06620269,cg13527508,cg14532412,cg08517659
chr17	2952193	2952213	2952196	UAK25	1-06321	cg11684897,cg02046423,cg24015889,cg04037236	chr17:2951665-2952534	1-02963,1-06321,1-00894	3	cg11684897,cg02046423,cg24015889,cg04037236,cg22104261,cg12895747,cg24548754,cg06620269,cg13527508,cg14532412,cg08517659
chr17	3438846	3438867	3438863	EGR1	1-01190	cg07740110,cg04104776,cg09593454	chr17:3438412-3439373	1-01190	1	cg22972519,cg06907418,cg03741619,cg17861455,cg07740110,cg04104776,cg09593454
chr17	4802762	4802776	4802776	NRF1	1-03649	cg22349396	chr17:4801877-4807066	1-06506,1-00517,1-02793,1-02918,1-04631,1-00652,1-06248,1-01053,1-01190,1-01577,1-02413,1-03649,1-04376,1-02812,1-03224,1-04655,1-03001,1-06498,1-01869,1-04139,1-02491	21	cg13050593,cg25900551,cg09826019,cg03652711,cg12608565,cg05529816,cg14275842,cg07834574,cg14482741,cg20814095,cg21071097,cg22795610,cg19753476,cg22349396,cg06444025,cg01726265,cg00744351,cg10553748,cg09495303,cg24768135,cg07066019,cg03272103,cg08538152,cg01739167,cg03433048,cg13504733,cg26333802,cg05019311
chr17	8702731	8702751	8702740	UAK25	1-01313	cg07796220,cg18432414,cg18963365	chr17:8702098-8703342	1-00041,1-00347,1-00508,1-04655,1-04901,1-04920,1-04926,1-04975,1-00652,1-00655,1-05675,1-05926,1-00808,1-03538,1-00876,1-01190,1-03894,1-03897,1-01304,1-01313,1-01553,1-02097,1-04380,1-04466,1-04472,1-04506,1-02413,1-04588,1-05437,1-09064	30	cg25045113,cg07796220,cg18432414,cg11685316,cg05730038,cg18561560,cg18963365,cg24203800,cg04259560,cg13997361,cg21335556
chr17	8702739	8702749	8702740	TCF3	1-01313	cg07796220,cg18432414,cg18963365	chr17:8702098-8703342	1-00041,1-00347,1-00508,1-04655,1-04901,1-04920,1-04926,1-04975,1-00652,1-00655,1-05675,1-05926,1-00808,1-03538,1-00876,1-01190,1-03894,1-03897,1-01304,1-01313,1-01553,1-02097,1-04380,1-04466,1-04472,1-04506,1-02413,1-04588,1-05437,1-09064	30	cg25045113,cg07796220,cg18432414,cg11685316,cg05730038,cg18561560,cg18963365,cg24203800,cg04259560,cg13997361,cg21335556
chr17	9479924	9479941	9479928	NRF1	1-04865	cg16202735,cg05296869,cg25964007,cg12610887,cg13386351,cg24089133,cg13050981,cg04420907,cg23907982	chr17:9478949-9480429	1-04865	1	cg24378470,cg20136025,cg12484593,cg02281226,cg20979099,cg18650462,cg16308461,cg27141120,cg15286748,cg16202735,cg05296869,cg25964007,cg12610887,cg09858237,cg13386351,cg24089133,cg13050981,cg04420907,cg23907982
chr17	14200821	14200831	14200823	TCF12	1-01989	cg26134159,cg09584358	chr17:14200789-14201939	1-05675,1-01306,1-01577,1-06988,1-02413,1-00046,1-02917,1-03038,1-00856,1-03437,1-04112,1-01989,1-04624	13	cg11589520,cg26134159,cg17498239,cg15909319,cg10519417,cg09584358,cg13388466,cg23280506
chr17	16284008	16284022	16284016	CTCF	1-02411	cg04537556,cg03919779,cg01286555,cg27351675,cg24668364,cg10637938,cg08434171	chr17:16283973-16285291	1-02024,1-02411	2	cg10262404,cg06537829,cg23752691,cg14349843,cg13425712,cg03919779,cg05090851,cg01286555,cg27351675,cg24668364,cg25745651,cg07587433,cg03954587,cg10637938,cg26598388,cg08434171,cg00960580
chr17	17109699	17109712	17109706	MYC	1-00667	cg16340422,cg19093370,cg24578857	chr17:17109238-17110642	1-00150,1-00667,1-04911,1-05379,1-02652,1-02793,1-02917,1-02918,1-03038,1-03159,1-05911,1-06248,1-03538,1-01174,1-03991,1-04095,1-01444,1-01553,1-02097,1-06506,1-06643,1-06690,1-06988,1-07593,1-04523,1-09064,1-05420,1-05570,1-05613,1-04893,1-00543,1-04164,1-07278	33	cg01412970,cg03292213,cg11392858,cg23661344,cg26539818,cg00572586,cg02880176,cg25393494,cg16340422,cg19093370,cg24578857,cg11713493,cg23448998,cg00860641
chr17	17109701	17109711	17109706	USF	1-00667	cg16340422,cg19093370,cg24578857	chr17:17109238-17110642	1-00150,1-00667,1-04911,1-05379,1-02652,1-02793,1-02917,1-02918,1-03038,1-03159,1-05911,1-06248,1-03538,1-01174,1-03991,1-04095,1-01444,1-01553,1-02097,1-06506,1-06643,1-06690,1-06988,1-07593,1-04523,1-09064,1-05420,1-05570,1-05613,1-04893,1-00543,1-04164,1-07278	33	cg01412970,cg03292213,cg11392858,cg23661344,cg26539818,cg00572586,cg02880176,cg25393494,cg16340422,cg19093370,cg24578857,cg11713493,cg23448998,cg00860641
chr17	17109701	17109714	17109706	MAX	1-00667	cg16340422,cg19093370,cg24578857	chr17:17109238-17110642	1-00150,1-00667,1-04911,1-05379,1-02652,1-02793,1-02917,1-02918,1-03038,1-03159,1-05911,1-06248,1-03538,1-01174,1-03991,1-04095,1-01444,1-01553,1-02097,1-06506,1-06643,1-06690,1-06988,1-07593,1-04523,1-09064,1-05420,1-05570,1-05613,1-04893,1-00543,1-04164,1-07278	33	cg01412970,cg03292213,cg11392858,cg23661344,cg26539818,cg00572586,cg02880176,cg25393494,cg16340422,cg19093370,cg24578857,cg11713493,cg23448998,cg00860641
chr17	17109706	17109713	17109706	UAK49	1-00667	cg16340422,cg19093370,cg24578857	chr17:17109238-17110642	1-00150,1-00667,1-04911,1-05379,1-02652,1-02793,1-02917,1-02918,1-03038,1-03159,1-05911,1-06248,1-03538,1-01174,1-03991,1-04095,1-01444,1-01553,1-02097,1-06506,1-06643,1-06690,1-06988,1-07593,1-04523,1-09064,1-05420,1-05570,1-05613,1-04893,1-00543,1-04164,1-07278	33	cg01412970,cg03292213,cg11392858,cg23661344,cg26539818,cg00572586,cg02880176,cg25393494,cg16340422,cg19093370,cg24578857,cg11713493,cg23448998,cg00860641
chr17	17109854	17109868	17109861	NFIC	1-07278	cg16340422,cg19093370,cg11713493,cg23448998	chr17:17109238-17110642	1-00150,1-00667,1-04911,1-05379,1-02652,1-02793,1-02917,1-02918,1-03038,1-03159,1-05911,1-06248,1-03538,1-01174,1-03991,1-04095,1-01444,1-01553,1-02097,1-06506,1-06643,1-06690,1-06988,1-07593,1-04523,1-09064,1-05420,1-05570,1-05613,1-04893,1-00543,1-04164,1-07278	33	cg01412970,cg03292213,cg11392858,cg23661344,cg26539818,cg00572586,cg02880176,cg25393494,cg16340422,cg19093370,cg24578857,cg11713493,cg23448998,cg00860641
chr17	17109854	17109868	17109862	NFIC	1-07278	cg16340422,cg19093370,cg11713493,cg23448998	chr17:17109238-17110642	1-00150,1-00667,1-04911,1-05379,1-02652,1-02793,1-02917,1-02918,1-03038,1-03159,1-05911,1-06248,1-03538,1-01174,1-03991,1-04095,1-01444,1-01553,1-02097,1-06506,1-06643,1-06690,1-06988,1-07593,1-04523,1-09064,1-05420,1-05570,1-05613,1-04893,1-00543,1-04164,1-07278	33	cg01412970,cg03292213,cg11392858,cg23661344,cg26539818,cg00572586,cg02880176,cg25393494,cg16340422,cg19093370,cg24578857,cg11713493,cg23448998,cg00860641
chr17	20799605	20799619	20799606	CTCF	1-01017	cg08458692,cg14560110,cg22516161,cg08288433,cg06809326,cg22570042,cg25893857,cg11633473,cg22282896,cg26496521	chr17:20798894-20799979	1-00389,1-04719,1-05124,1-02627,1-02917,1-00652,1-05977,1-06321,1-00818,1-00914,1-01017,1-03639,1-03996,1-04113,1-01306,1-01384,1-01553,1-04157,1-04203,1-06506,1-04299,1-04460,1-02408,1-08788,1-07419,1-04589,1-05597,1-05613	28	cg06633402,cg18251984,cg08458692,cg14560110,cg22516161,cg08288433,cg06809326,cg22570042,cg25893857,cg11633473,cg22282896,cg26496521
chr17	26593988	26594002	26593995	YY1	1-02411	cg12897568,cg00825705,cg04898773	chr17:26592725-26593561	1-02411	1	cg02243096,cg14327068,cg09968036,cg12897568,cg00825705
chr17	26593997	26594011	26594003	YY1	1-02411	cg12897568,cg00825705,cg04898773	chr17:26592725-26593561	1-02411	1	cg02243096,cg14327068,cg09968036,cg12897568,cg00825705
chr17	27918044	27918058	27918050	ZNF263	1-04389	cg05379350,cg08217285,cg20350981	chr17:27916350-27918208	1-00808,1-00249,1-00347,1-04782,1-04920,1-03639,1-01019,1-02234,1-04389,1-04465,1-02491,1-07551,1-04523,1-04588	14	cg02392688,cg02959429,cg16347833,cg05379350,cg22410751,cg08217285,cg20350981,cg21468728
chr17	31255083	31255105	31255099	E2F4	1-07386	cg17096412,cg03353971,cg08254353,cg26381501,cg11833861	chr17:31254543-31255269	1-07386	1	cg17096412,cg03353971,cg08254353,cg26381501,cg21406089,cg02199174,cg04847920,cg02981443,cg12969595,cg16710302,cg22213821
chr17	33760430	33760444	33760433	CTCF-ext	1-04512	cg03251655,cg11346248,cg21697381,cg10431713,cg08330690,cg10514580,cg18587557,cg03237218	chr17:33759511-33760972	1-00071,1-00304,1-00312,1-00319,1-00508,1-00667,1-00797,1-04782,1-04865,1-05007,1-05093,1-02769,1-02812,1-03038,1-03191,1-00543,1-00610,1-03258,1-06321,1-03665,1-01045,1-01190,1-03825,1-01238,1-01869,1-02241,1-02264,1-02290,1-02324,1-02413,1-04512,1-09064,1-05420,1-05476,1-05009,1-02786,1-01049	37	cg03251655,cg19963856,cg24470734,cg11346248,cg21697381,cg19566405,cg05174890,cg10431713,cg20354552,cg00492719,cg08330690,cg10514580,cg18587557,cg03237218,cg16771063
chr17	33814952	33814965	33814952	AP1	1-00818	cg01045118,cg19157162,cg14388433,cg14809705,cg07136338,cg08664237,cg26377000,cg09332674	chr17:33814162-33815524	1-00818	1	cg01045118,cg19157162,cg20429250,cg25951501,cg07257441,cg14388433,cg14809705,cg07136338,cg08664237,cg26377000,cg09332674,cg27131551,cg04616544
chr17	35850414	35850435	35850426	EGR1	1-03038	cg05013507,cg20018022	chr17:35850481-35851460	1-04855,1-03038,1-01045,1-01444,1-01577,1-02024,1-02234,1-04139,1-04232,1-04466,1-05437	11	cg04347633,cg09234474,cg05013507,cg20018022,cg06716730
chr17	36666602	36666621	36666606	E2F4	1-04624	cg05424022,cg11637712,cg24698979,cg16300419,cg07118262,cg15825321,cg01564268	chr17:36665825-36667783	1-04624,1-06321,1-01053,1-02413,1-04252,1-05437	6	cg05424022,cg11637712,cg24698979,cg16300419,cg07118262,cg15825321,cg01564268,cg04645039,cg24534926,cg19702274
chr17	37023889	37023903	37023889	CTCF	1-01989	cg09592244,cg20826740,cg14624145	chr17:37024019-37025041	1-04920,1-02874,1-02959,1-00645,1-03374,1-06321,1-03846,1-01238,1-01384,1-01989,1-08788,1-07084	12	cg09592244,cg20826740,cg14624145,cg16207110,cg04569429,cg07247343
chr17	37023889	37023903	37023890	CTCF	1-01989	cg09592244,cg20826740,cg14624145	chr17:37024019-37025041	1-04920,1-02874,1-02959,1-00645,1-03374,1-06321,1-03846,1-01238,1-01384,1-01989,1-08788,1-07084	12	cg09592244,cg20826740,cg14624145,cg16207110,cg04569429,cg07247343
chr17	37123794	37123808	37123795	ZNF143	1-06321	cg14399930,cg26740942	chr17:37123637-37124559	1-00071,1-04774,1-04865,1-04870,1-05007,1-05009,1-05093,1-05124,1-03190,1-03393,1-05675,1-06321,1-06370,1-00808,1-00874,1-00894,1-00982,1-03639,1-03652,1-01019,1-01238,1-06690,1-04367,1-04389,1-02408,1-02413,1-07555,1-04624,1-05570	29	cg22361859,cg14399930,cg16530382,cg26740942,cg10600889,cg00055529,cg04120272,cg23965214,cg06711380,cg09475901,cg10430963
chr17	37793314	37793328	37793322	SP1	1-04865	cg07295307,cg24483576,cg26161820	chr17:37792737-37793718	1-04865	1	cg07295307,cg24483576,cg26161820,cg00871133,cg14115004,cg27493484,cg08866639,cg22256604,cg00264346,cg11693508,cg01325958,cg24201296,cg09642357,cg23894539,cg21338031,cg10490843
chr17	37793318	37793332	37793322	AP2	1-04865	cg07295307,cg24483576,cg26161820	chr17:37792737-37793718	1-04865	1	cg07295307,cg24483576,cg26161820,cg00871133,cg14115004,cg27493484,cg08866639,cg22256604,cg00264346,cg11693508,cg01325958,cg24201296,cg09642357,cg23894539,cg21338031,cg10490843
chr17	38183443	38183457	38183455	CTCF	1-06321	cg03671276,cg03367679,cg03568305,cg10374813	chr17:38183169-38184258	1-06321	1	cg20935841,cg03671276,cg03367679,cg03568305,cg10374813,cg15027059,cg01039117
chr17	38519678	38519697	38519695	E2F4	1-03846	cg06565253	chr17:38517640-38521075	1-04870,1-05124,1-02627,1-00625,1-00645,1-00825,1-03846,1-01238,1-01577,1-04333,1-04466,1-04506,1-04512,1-05476,1-06321,1-04367,1-04774,1-03159,1-03190,1-03394,1-05437	21	cg18748499,cg05568941,cg06949812,cg22896075,cg05930207,cg06565253,cg01367005,cg24364564,cg00994896,cg05409596,cg11758793,cg09485398,cg26245921,cg02216727,cg16586061,cg05347914,cg19496005
chr17	39968076	39968095	39968076	E2F4	1-04624	cg02022224,cg20798677	chr17:39968309-39970092	1-00112,1-00174,1-00806,1-01049,1-01553,1-07555,1-04624,1-01304	8	cg02038468,cg19561185,cg23831155,cg01131735,cg16691224,cg15835536,cg20798677,cg14529146,cg13766044,cg03466032,cg09471280,cg27544799,cg04110109,cg05211864,cg09221413,cg19779810,cg21626848,cg10493699,cg21735374,cg21416237
chr17	41277134	41277141	41277135	V_PU1_Q4	1-07386	cg25067162	chr17:41277005-41279023	1-02917,1-03374,1-04465,1-02411,1-08788,1-00423,1-00770,1-04693,1-04774,1-04921,1-05124,1-02627,1-03038,1-06321,1-00874,1-03639,1-01049,1-03894,1-01805,1-04367,1-04472,1-07386,1-07593,1-04512,1-04624,1-04884,1-02769,1-02900,1-02918,1-03394,1-04071,1-04252,1-06506,1-04870,1-05379,1-00854,1-00645,1-03897,1-01053,1-05009,1-01075,1-04389	42	cg12984107,cg19531713,cg19088651,cg08386886,cg08993267,cg24806953,cg20187250,cg15419295,cg16963062,cg16630982,cg21253966,cg04110421,cg04658354,cg17301289,cg09441966,cg26891576,cg20760063,cg10125569,cg01587050,cg10893007,cg11126247,cg12182452,cg09831010,cg25067162,cg26276233,cg06001716,cg02286533,cg14947218,cg16006004,cg18372208,cg25288140,cg19454999,cg11529738,cg26370022,cg24900425,cg19442659,cg2…
chr17	43221205	43221219	43221216	UAK42	1-11800	cg00677574,cg24180402,cg06100756,cg12410551	chr17:43221219-43222259	1-00304,1-00667,1-04855,1-04920,1-11800,1-03374,1-00808,1-00874,1-03627,1-01238,1-01306,1-01384,1-06537	13	cg27395066,cg00677574,cg24180402,cg06100756,cg12410551,cg00625783,cg17372941,cg00348467,cg13215995
chr17	45401126	45401140	45401130	CTCF-ext	1-00625	cg02656472,cg25173405,cg08085267	chr17:45400747-45402381	1-05007,1-00080,1-00197,1-05124,1-00625,1-00645,1-06498,1-01075	8	cg17124509,cg22643313,cg12673151,cg20437221,cg08593077,cg19079546,cg07515367,cg20046964,cg09880780,cg26284982,cg25173405,cg08085267,cg20676602,cg02511570
chr17	45401410	45401424	45401414	UAK42	1-00625	cg02656472,cg25173405,cg08085267,cg20676602,cg02511570	chr17:45400747-45402381	1-05007,1-00080,1-00197,1-05124,1-00625,1-00645,1-06498,1-01075	8	cg17124509,cg22643313,cg12673151,cg20437221,cg08593077,cg19079546,cg07515367,cg20046964,cg09880780,cg26284982,cg25173405,cg08085267,cg20676602,cg02511570
chr17	45401414	45401424	45401414	ETS1	1-00625	cg02656472,cg25173405,cg08085267,cg20676602,cg02511570	chr17:45400747-45402381	1-05007,1-00080,1-00197,1-05124,1-00625,1-00645,1-06498,1-01075	8	cg17124509,cg22643313,cg12673151,cg20437221,cg08593077,cg19079546,cg07515367,cg20046964,cg09880780,cg26284982,cg25173405,cg08085267,cg20676602,cg02511570
chr17	46682165	46682184	46682179	SP1	1-02918	cg20471691,cg17179862,cg05900563	chr17:46678718-46683410	1-00304,1-00344,1-00739,1-00806,1-04975,1-02544,1-00625,1-04113,1-02097,1-06988,1-07026,1-02413,1-04523,1-05153,1-04631,1-03298,1-03665,1-01174,1-04112,1-06690,1-07442,1-05613,1-00034,1-03059,1-05675,1-03422,1-04071,1-04095,1-06537,1-04389,1-02324,1-04624,1-00389,1-02793,1-02918,1-03840,1-03842,1-02260,1-04465,1-03578,1-05570,1-05124,1-05635,1-04466,1-07551,1-04540,1-05476	47	cg24889708,cg14509967,cg11207533,cg02566861,cg09983216,cg07796575,cg21816532,cg21387752,cg01723934,cg00072689,cg15435170,cg01986016,cg20471691,cg17179862,cg03803541,cg05900563,cg14230750,cg16848873,cg05888755,cg10906729,cg18684142,cg04588674,cg19828220,cg04435975,cg22273285,cg18878432
chr17	46682169	46682191	46682179	UAK42	1-02918	cg20471691,cg17179862,cg05900563	chr17:46678718-46683410	1-00304,1-00344,1-00739,1-00806,1-04975,1-02544,1-00625,1-04113,1-02097,1-06988,1-07026,1-02413,1-04523,1-05153,1-04631,1-03298,1-03665,1-01174,1-04112,1-06690,1-07442,1-05613,1-00034,1-03059,1-05675,1-03422,1-04071,1-04095,1-06537,1-04389,1-02324,1-04624,1-00389,1-02793,1-02918,1-03840,1-03842,1-02260,1-04465,1-03578,1-05570,1-05124,1-05635,1-04466,1-07551,1-04540,1-05476	47	cg24889708,cg14509967,cg11207533,cg02566861,cg09983216,cg07796575,cg21816532,cg21387752,cg01723934,cg00072689,cg15435170,cg01986016,cg20471691,cg17179862,cg03803541,cg05900563,cg14230750,cg16848873,cg05888755,cg10906729,cg18684142,cg04588674,cg19828220,cg04435975,cg22273285,cg18878432
chr17	47785750	47785764	47785750	CTCF	1-07084	cg08097940,cg02104976,cg06375292,cg24628298	chr17:47785318-47786427	1-07084	1	cg02611615,cg04641058,cg01650744,cg08089541,cg08731720,cg06016431,cg23576473,cg18238165,cg08097940,cg02104976,cg06375292,cg24628298
chr17	48546415	48546429	48546420	UAK42	1-00423	cg07552236,cg21906638,cg15506894,cg25792518	chr17:48545518-48547269	1-00389,1-00423,1-04870,1-01306,1-01989,1-04252,1-06506,1-04333,1-04400,1-02413,1-07555,1-04523,1-02411	13	cg07552236,cg21906638,cg15506894,cg25792518,cg06958829,cg17890928,cg15880760,cg19046826,cg10421979,cg21170629,cg19961043,cg13764778,cg05180443,cg06818777,cg07730609
chr17	49243733	49243747	49243741	SP1	1-01075	cg15884223,cg00687233,cg25022915	chr17:49242270-49244798	1-02874,1-01075,1-07004,1-02411,1-04252,1-01989	6	cg00783184,cg03401213,cg12927869,cg14605835,cg06877848,cg07545306,cg14136186,cg15884223,cg15085248,cg14411375,cg00687233,cg25022915,cg01454528,cg12961714,cg01783322,cg11249998,cg09366703,cg08884368,cg17738503,cg26508844,cg14680575,cg22932220,cg12251075,cg26739807
chr17	56736566	56736580	56736576	STAT1	1-00825	cg17283347,cg25357430,cg08868352,cg18911472,cg27159088,cg09324113	chr17:56736570-56737492	1-00825	1	cg17283347,cg06325249,cg25357430,cg08868352,cg18911472,cg27159088,cg09324113,cg19214435
chr17	56736573	56736587	56736576	UA1	1-00825	cg17283347,cg25357430,cg08868352,cg18911472,cg27159088,cg09324113	chr17:56736570-56737492	1-00825	1	cg17283347,cg06325249,cg25357430,cg08868352,cg18911472,cg27159088,cg09324113,cg19214435
chr17	56736865	56736884	56736881	GATA1-ext	1-00825	cg17283347,cg25357430,cg08868352,cg18911472,cg27159088,cg09324113	chr17:56736570-56737492	1-00825	1	cg17283347,cg06325249,cg25357430,cg08868352,cg18911472,cg27159088,cg09324113,cg19214435
chr17	56736876	56736890	56736881	SP1	1-00825	cg17283347,cg25357430,cg08868352,cg18911472,cg27159088,cg09324113	chr17:56736570-56737492	1-00825	1	cg17283347,cg06325249,cg25357430,cg08868352,cg18911472,cg27159088,cg09324113,cg19214435
chr17	62773942	62773956	62773951	PU1	1-00625	cg23556923,cg12097883	chr17:62774589-62776531	1-04884,1-02900,1-02959,1-00625,1-05726,1-01049,1-03996,1-01306,1-07004,1-03191	10	cg23556923,cg12097883,cg17783086,cg07523833,cg17332379,cg14501219,cg17840858,cg12854371,cg11849086
chr17	73630066	73630086	73630085	UAK25	1-04920	cg07340881,cg12197142,cg09882452,cg04448648,cg09320702	chr17:73628529-73630406	1-00652,1-04920	2	cg16888818,cg07989917,cg07340881,cg12197142,cg10407598,cg22590522,cg02330706,cg11331344,cg04680282,cg09882452,cg04448648,cg09320702
chr17	73630074	73630088	73630085	CTCF	1-04920	cg07340881,cg12197142,cg09882452,cg04448648,cg09320702	chr17:73628529-73630406	1-00652,1-04920	2	cg16888818,cg07989917,cg07340881,cg12197142,cg10407598,cg22590522,cg02330706,cg11331344,cg04680282,cg09882452,cg04448648,cg09320702
chr17	74523936	74523956	74523942	UAK25	1-01304	cg18449873,cg14142253,cg03136659	chr17:74523423-74526584	1-00400,1-00806,1-11800,1-02959,1-05673,1-05999,1-06204,1-01304,1-01989,1-06506,1-07419,1-07593,1-04512,1-04588,1-03897,1-02491	16	cg10380533,cg21935511,cg18449873,cg14142253,cg03136659,cg09722216,cg17005273,cg08289350,cg11434671,cg24126567,cg11814882,cg27324308,cg05150993,cg16427420,cg07597099
chr17	75136675	75136689	75136688	SP1	1-04588	cg13868393,cg09570535,cg20487366,cg25344639	chr17:75136248-75137676	1-04465,1-04588	2	cg13868393,cg04060163,cg26547236,cg01888561,cg14416747,cg18815765,cg23891712,cg09570535,cg20487366,cg14159220,cg01835037,cg14821192,cg25344639,cg21325316,cg11416367
chr17	75136679	75136693	75136688	UAK42	1-04588	cg13868393,cg09570535,cg20487366,cg25344639	chr17:75136248-75137676	1-04465,1-04588	2	cg13868393,cg04060163,cg26547236,cg01888561,cg14416747,cg18815765,cg23891712,cg09570535,cg20487366,cg14159220,cg01835037,cg14821192,cg25344639,cg21325316,cg11416367
chr17	77078988	77079002	77078990	CTCF	1-01313	cg25292316,cg08040395,cg21022002,cg01707361	chr17:77078090-77079032	1-00157,1-00389,1-02918,1-01313	4	cg17099445,cg25639095,cg27052455,cg09257677,cg08857194,cg25292316,cg08040395,cg21022002,cg01707361
chr17	77895639	77895653	77895642	UAK42	1-05673	cg06890161,cg06241101,cg04440361,cg14383174	chr17:77895595-77896585	1-05673,1-03842,1-01238,1-01869,1-06506,1-06690	6	cg06890161,cg06241101,cg04440361,cg14383174,cg18248273,cg23632109
chr17	78944377	78944397	78944381	UAK25	1-02264	cg24329839,cg07856560,cg24222379	chr17:78944884-78945314	1-02264,1-06506	2	cg27328694,cg24329839,cg07856560,cg24222379,cg09010597
chr17	79070658	79070672	79070670	ZNF263	1-02769	cg03076037,cg27022584	chr17:79071360-79072762	1-02769,1-02918,1-03627,1-06506,1-07004,1-04523,1-05613,1-00625	8	cg03076037,cg27022584,cg21275903,cg15154427,cg03297465,cg16381019,cg23660949
chr17	79504672	79504693	79504688	UAK18	1-00389	cg02090762,cg12252135,cg00333483,cg00344577	chr17:79503291-79504746	1-00389,1-05174,1-03578,1-03627,1-01190,1-01984,1-06506,1-05009	8	cg13694281,cg09699056,cg02090762,cg12252135,cg07707031,cg00333483,cg00344577
chr17	79504672	79504693	79504688	UAK18	1-05009	cg02090762,cg12252135,cg00333483,cg00344577	chr17:79503291-79504746	1-00389,1-05174,1-03578,1-03627,1-01190,1-01984,1-06506,1-05009	8	cg13694281,cg09699056,cg02090762,cg12252135,cg07707031,cg00333483,cg00344577
chr17	79504682	79504696	79504688	SP1	1-00389	cg02090762,cg12252135,cg00333483,cg00344577	chr17:79503291-79504746	1-00389,1-05174,1-03578,1-03627,1-01190,1-01984,1-06506,1-05009	8	cg13694281,cg09699056,cg02090762,cg12252135,cg07707031,cg00333483,cg00344577
chr17	79504682	79504696	79504688	SP1	1-05009	cg02090762,cg12252135,cg00333483,cg00344577	chr17:79503291-79504746	1-00389,1-05174,1-03578,1-03627,1-01190,1-01984,1-06506,1-05009	8	cg13694281,cg09699056,cg02090762,cg12252135,cg07707031,cg00333483,cg00344577
chr18	23713888	23713907	23713906	E2F4	1-03578	cg11858305,cg01630687,cg06377543,cg03162994,cg15865827,cg01070760,cg21248196	chr18:23712816-23714085	1-00071,1-04782,1-02874,1-05926,1-06248,1-06321,1-03578,1-01049,1-06506,1-04299,1-07084,1-04624,1-00400,1-00517,1-04652,1-04870,1-05124,1-02786,1-02987,1-03191,1-00645,1-03275,1-05946,1-00825,1-00856,1-03422,1-01017,1-03649,1-01238,1-01869,1-04400,1-04465,1-08788,1-04588	34	cg23481109,cg07428713,cg11858305,cg24247743,cg25983544,cg01630687,cg06377543,cg03162994,cg00262344,cg15865827,cg22027766,cg01070760,cg21248196
chr18	52626513	52626534	52626515	EGR1	1-00832	cg07177852,cg12974637,cg02545294,cg02699761,cg03778029	chr18:52626145-52627628	1-05093,1-05379,1-02987,1-00832,1-04252,1-04333,1-04460,1-02324,1-02331,1-09064	10	cg15343100,cg03262811,cg07177852,cg12955441,cg12974637,cg02545294,cg02699761,cg03778029,cg08332635,cg26630735,cg14352267,cg12432709,cg06163274,cg26060179
chr18	77006689	77006709	77006703	UAK25	1-02769	cg22733266,cg24688963,cg14443256	chr18:77006547-77006684	1-02769,1-04624	2	cg22733266,cg24688963,cg14443256
chr18	77006689	77006709	77006703	UAK25	1-04624	cg22733266,cg24688963,cg14443256	chr18:77006547-77006684	1-02769,1-04624	2	cg22733266,cg24688963,cg14443256
chr18	77006689	77006709	77006709	UAK25	1-04624	cg22733266,cg24688963,cg14443256	chr18:77006547-77006684	1-02769,1-04624	2	cg22733266,cg24688963,cg14443256
chr18	77006691	77006705	77006703	E2F1	1-02769	cg22733266,cg24688963,cg14443256	chr18:77006547-77006684	1-02769,1-04624	2	cg22733266,cg24688963,cg14443256
chr18	77006691	77006705	77006703	E2F1	1-04624	cg22733266,cg24688963,cg14443256	chr18:77006547-77006684	1-02769,1-04624	2	cg22733266,cg24688963,cg14443256
chr18	77006697	77006711	77006703	CTCF	1-02769	cg22733266,cg24688963,cg14443256	chr18:77006547-77006684	1-02769,1-04624	2	cg22733266,cg24688963,cg14443256
chr18	77006697	77006711	77006703	CTCF	1-04624	cg22733266,cg24688963,cg14443256	chr18:77006547-77006684	1-02769,1-04624	2	cg22733266,cg24688963,cg14443256
chr18	77006697	77006711	77006709	CTCF	1-04624	cg22733266,cg24688963,cg14443256	chr18:77006547-77006684	1-02769,1-04624	2	cg22733266,cg24688963,cg14443256
chr18	77006705	77006715	77006709	UAK26	1-04624	cg22733266,cg24688963,cg14443256	chr18:77006547-77006684	1-02769,1-04624	2	cg22733266,cg24688963,cg14443256
chr19	1465864	1465878	1465868	CTCF	1-07555	cg22560193	chr19:1465059-1468944	1-03038,1-04190,1-06506,1-04460,1-04472,1-02627,1-05888,1-06321,1-03676,1-01019,1-02411,1-02413,1-05613,1-00625,1-03627,1-06537,1-07555	17	cg02574474,cg04624885,cg12154045,cg22560193,cg06346838,cg15709766,cg05620923,cg04203646,cg05457563,cg10169241,cg10094078,cg03306486,cg19333963,cg19305488,cg10090761,cg10565187
chr19	1789013	1789030	1789016	CREB-ext	1-01805	cg00844950,cg14231523,cg17771569	chr19:1789059-1789619	1-01805	1	cg00844950,cg14231523,cg02618733,cg17771569
chr19	1789014	1789028	1789016	CTCF	1-01805	cg00844950,cg14231523,cg17771569	chr19:1789059-1789619	1-01805	1	cg00844950,cg14231523,cg02618733,cg17771569
chr19	1789016	1789036	1789016	UAK25	1-01805	cg00844950,cg14231523,cg17771569	chr19:1789059-1789619	1-01805	1	cg00844950,cg14231523,cg02618733,cg17771569
chr19	2494843	2494857	2494852	SP1	1-00304	cg01515960,cg10283371,cg10227077,cg23254497	chr19:2493739-2495335	1-03897,1-06506,1-00304,1-05613	4	cg24101337,cg11930564,cg03748603,cg01515960,cg10283371,cg07718811,cg10227077,cg23254497
chr19	2494846	2494861	2494852	PAX5	1-00304	cg01515960,cg10283371,cg10227077,cg23254497	chr19:2493739-2495335	1-03897,1-06506,1-00304,1-05613	4	cg24101337,cg11930564,cg03748603,cg01515960,cg10283371,cg07718811,cg10227077,cg23254497
chr19	2494847	2494861	2494852	UAK42	1-00304	cg01515960,cg10283371,cg10227077,cg23254497	chr19:2493739-2495335	1-03897,1-06506,1-00304,1-05613	4	cg24101337,cg11930564,cg03748603,cg01515960,cg10283371,cg07718811,cg10227077,cg23254497
chr19	3062571	3062587	3062577	NRF1	1-02260	cg13044136,cg23121046	chr19:3062216-3063729	1-00770,1-00801,1-11800,1-05675,1-03538,1-02260,1-04460	7	cg24809037,cg10184252,cg13044136,cg15803614,cg23121046,cg09935500,cg00395140
chr19	3830911	3830918	3830914	UAK20	1-06988	cg10915225,cg04154502,cg15062725	chr19:3830827-3831860	1-06988,1-05597	2	cg10915225,cg04154502,cg15062725,cg12034488,cg23380496
chr19	4153559	4153573	4153565	NFY	1-05635	cg10009657,cg23777956,cg20154618,cg19771372	chr19:4152650-4153714	1-00625,1-05675,1-04071,1-01313,1-02411,1-04512,1-04893,1-03846,1-04113,1-01989,1-04466,1-05635	12	cg20887340,cg11620868,cg12043561,cg04524040,cg10009657,cg20640432,cg13509147,cg23777956,cg20154618,cg19771372
chr19	4535368	4535382	4535374	NRF1	1-04624	cg15255455,cg22932336,cg04532834	chr19:4534985-4535583	1-04624	1	cg15255455,cg22932336,cg04532834,cg14951193,cg07071609,cg22828045,cg04547205,cg24720441,cg17718457,cg12756021,cg02593507
chr19	7927237	7927251	7927242	ZNF263	1-02959	cg27413421,cg15974673,cg02961707	chr19:7926007-7929644	1-02959,1-06506,1-05437,1-03275,1-02413,1-00801,1-04460,1-04472	8	cg12474223,cg11765913,cg27413421,cg15974673,cg04724735,cg02961707,cg19981796,cg03509094,cg24014869,cg22501922,cg19419650
chr19	7985178	7985188	7985183	UAK48	1-02411	cg02772682	chr19:7983605-7985171	1-00157,1-00739,1-04782,1-04865,1-04921,1-05124,1-02812,1-02917,1-02959,1-06321,1-00832,1-03534,1-01049,1-01238,1-02183,1-04190,1-06506,1-04460,1-02411,1-02413,1-07419,1-04523,1-05613	23	cg10725861,cg24156854,cg26284544,cg00654322,cg10073052,cg03840143,cg03685315,cg02405517,cg24132694,cg10152810,cg15535092,cg07667813,cg25462384
chr19	8400086	8400105	8400092	E2F4	1-03038	cg03296789,cg02263144	chr19:8398213-8399564	1-00041,1-00157,1-00702,1-04870,1-03038,1-05673,1-03627,1-01238,1-04164,1-06506,1-04588	11	cg03882914,cg17490089,cg22857356,cg15873327,cg04202887,cg03296789,cg02263144,cg24731702
chr19	13134121	13134135	13134134	UAK42	1-03897	cg23862562,cg17478763,cg11233113	chr19:13133342-13136169	1-00080,1-00174,1-00304,1-04693,1-02812,1-02987,1-03038,1-03258,1-00832,1-00874,1-03422,1-03897,1-04190,1-07084,1-00702,1-04782,1-04870,1-04921,1-05009,1-06321,1-01869,1-06988,1-04367,1-04389,1-02408,1-02411,1-02413,1-02425,1-04624,1-00423,1-00761,1-04893,1-04112,1-04333,1-05597,1-05613,1-05675	37	cg23862562,cg17478763,cg11233113,cg20665774,cg03347722,cg23526147,cg12566747,cg16673929,cg05429921,cg04965297,cg26581012,cg25406206,cg19611364,cg11758861,cg17976191,cg01001422,cg24277817,cg06744585,cg26767614
chr19	18109161	18109181	18109180	UAK25	1-01313	cg00764668,cg15473218,cg26279525	chr19:18108894-18109485	1-03676,1-01313,1-06506	3	cg00764668,cg15473218,cg20733663,cg26279525
chr19	18109169	18109183	18109180	CTCF	1-01313	cg00764668,cg15473218,cg26279525	chr19:18108894-18109485	1-03676,1-01313,1-06506	3	cg00764668,cg15473218,cg20733663,cg26279525
chr19	18497071	18497085	18497073	CTCF	1-00914	cg09538452,cg19479654,cg16929104,cg21211585,cg08162780	chr19:18496258-18497743	1-00808,1-00894,1-00914,1-04523,1-00982	5	cg14213160,cg09538452,cg19479654,cg16929104,cg21211585,cg08162780,cg12008047,cg03207391,cg24817197
chr19	18497073	18497087	18497073	UA3	1-00914	cg09538452,cg19479654,cg16929104,cg21211585,cg08162780	chr19:18496258-18497743	1-00808,1-00894,1-00914,1-04523,1-00982	5	cg14213160,cg09538452,cg19479654,cg16929104,cg21211585,cg08162780,cg12008047,cg03207391,cg24817197
chr19	18497073	18497093	18497073	UAK25	1-00914	cg09538452,cg19479654,cg16929104,cg21211585,cg08162780	chr19:18496258-18497743	1-00808,1-00894,1-00914,1-04523,1-00982	5	cg14213160,cg09538452,cg19479654,cg16929104,cg21211585,cg08162780,cg12008047,cg03207391,cg24817197
chr19	18699730	18699744	18699742	NRF1	1-00543	cg00667525,cg08615372,cg15007983	chr19:18699117-18701321	1-04911,1-05093,1-00543,1-00652,1-06321,1-01053,1-03842,1-01256,1-06506,1-04512,1-04624,1-02959,1-03627	13	cg00667525,cg25234359,cg08615372,cg15007983,cg22038059,cg03414830,cg07849805,cg19342159,cg22654626,cg07714600,cg25545394,cg10638552,cg25979108,cg19492423,cg21977234
chr19	18699739	18699753	18699742	SP1	1-00543	cg00667525,cg08615372,cg15007983	chr19:18699117-18701321	1-04911,1-05093,1-00543,1-00652,1-06321,1-01053,1-03842,1-01256,1-06506,1-04512,1-04624,1-02959,1-03627	13	cg00667525,cg25234359,cg08615372,cg15007983,cg22038059,cg03414830,cg07849805,cg19342159,cg22654626,cg07714600,cg25545394,cg10638552,cg25979108,cg19492423,cg21977234
chr19	35615497	35615516	35615507	E2F4	1-05675	cg04778274,cg11620066,cg27316970	chr19:35615443-35615639	1-00157,1-05675,1-03676,1-01260,1-01306,1-06690	6	cg04778274,cg11620066,cg27316970
chr19	38042262	38042282	38042268	UAK17	1-02411	cg15415136	chr19:38039468-38042473	1-00174,1-04865,1-04631,1-03422,1-06506,1-04466,1-02411,1-05673,1-01805	9	cg25757140,cg00879218,cg17967673,cg04495619,cg04266189,cg02271380,cg08083988,cg22178687,cg25498326,cg09797063,cg20700792,cg23200342,cg17431391,cg27389185,cg09846076,cg15415136,cg03975694
chr19	41946059	41946074	41946065	B-Box	1-02411	cg02395768,cg01555270,cg08639244,cg09304006,cg08064261,cg11336323	chr19:41945351-41946041	1-02411	1	cg14054120,cg26688832,cg24830872,cg02395768,cg01555270,cg17890520,cg27498675,cg08099193,cg09537434,cg14132834,cg08639244,cg08685384,cg09304006,cg08064261,cg11336323
chr19	44871451	44871465	44871465	SP1	1-00652	cg12227611,cg04695058,cg00434211,cg20967514	chr19:44871446-44872295	1-00174,1-02874,1-00652,1-00655	4	cg12227611,cg04695058,cg00434211,cg17074215,cg20967514
chr19	49891501	49891515	49891509	NRF1	1-00389	cg24324837	chr19:49890914-49891604	1-00389,1-11800,1-02918,1-00652,1-05846,1-05926,1-00914,1-01049,1-04113,1-04333,1-02413,1-09064	12	cg05211342,cg22307029,cg22590775,cg24324837,cg22133161
chr19	50734117	50734136	50734121	E2F4	1-04071	cg14106680,cg02192974,cg11992783	chr19:50733984-50734546	1-02876,1-05675,1-05977,1-01049,1-01174,1-04071,1-01238,1-01384,1-06690,1-05437	10	cg14106680,cg02192974,cg11992783,cg15448553
chr19	50734117	50734136	50734121	E2F4	1-05675	cg14106680,cg02192974,cg11992783	chr19:50733984-50734546	1-02876,1-05675,1-05977,1-01049,1-01174,1-04071,1-01238,1-01384,1-06690,1-05437	10	cg14106680,cg02192974,cg11992783,cg15448553
chr19	50862227	50862244	50862240	v-JUN	1-04782	cg12273319,cg00297876,cg22018083,cg06747330,cg26456183	chr19:50860533-50862122	1-04782,1-02918,1-03038,1-06506,1-04655,1-04870,1-04901,1-02627,1-05999,1-06370,1-03627,1-03825,1-04624,1-04915,1-02926,1-05888,1-06321,1-01238,1-06690,1-04367,1-04523,1-05613,1-04921	23	cg15016511,cg06481825,cg26952796,cg12153593,cg12273319,cg00297876,cg22018083,cg06747330,cg08194323,cg26456183
chr19	50862229	50862249	50862240	UAK17	1-04782	cg12273319,cg00297876,cg22018083,cg06747330,cg26456183	chr19:50860533-50862122	1-04782,1-02918,1-03038,1-06506,1-04655,1-04870,1-04901,1-02627,1-05999,1-06370,1-03627,1-03825,1-04624,1-04915,1-02926,1-05888,1-06321,1-01238,1-06690,1-04367,1-04523,1-05613,1-04921	23	cg15016511,cg06481825,cg26952796,cg12153593,cg12273319,cg00297876,cg22018083,cg06747330,cg08194323,cg26456183
chr19	50862231	50862241	50862240	CREB	1-04782	cg12273319,cg00297876,cg22018083,cg06747330,cg26456183	chr19:50860533-50862122	1-04782,1-02918,1-03038,1-06506,1-04655,1-04870,1-04901,1-02627,1-05999,1-06370,1-03627,1-03825,1-04624,1-04915,1-02926,1-05888,1-06321,1-01238,1-06690,1-04367,1-04523,1-05613,1-04921	23	cg15016511,cg06481825,cg26952796,cg12153593,cg12273319,cg00297876,cg22018083,cg06747330,cg08194323,cg26456183
chr19	55691521	55691541	55691536	UAK17	1-02627	cg22066304,cg11896550,cg09581940	chr19:55691729-55692712	1-02627,1-06506	2	cg22066304,cg26477844,cg06744978,cg22294241,cg05558546,cg10080004,cg11896550,cg05512200,cg09581940,cg13356285
chr19	55691521	55691542	55691536	EGR1	1-02627	cg22066304,cg11896550,cg09581940	chr19:55691729-55692712	1-02627,1-06506	2	cg22066304,cg26477844,cg06744978,cg22294241,cg05558546,cg10080004,cg11896550,cg05512200,cg09581940,cg13356285
chr19	55691533	55691547	55691536	UAK42	1-02627	cg22066304,cg11896550,cg09581940	chr19:55691729-55692712	1-02627,1-06506	2	cg22066304,cg26477844,cg06744978,cg22294241,cg05558546,cg10080004,cg11896550,cg05512200,cg09581940,cg13356285
chr19	55888133	55888160	55888146	E2F4	1-00856	cg15986919,cg04800569,cg08133641	chr19:55887151-55889612	1-00112,1-04855,1-02900,1-00856,1-04071,1-01238,1-01869,1-02097,1-06506,1-02324,1-08788,1-05613,1-00389,1-00423,1-00806,1-04774,1-07593,1-01553,1-00157,1-04893,1-04926,1-05009,1-03652,1-04112,1-02234,1-02413,1-00034,1-11800,1-00894,1-01306,1-04389,1-07278,1-05420	33	cg26397459,cg04264070,cg24226529,cg15986919,cg25921357,cg04800569,cg08133641,cg15520962,cg19910200,cg23750193,cg19402371,cg06693983,cg01695406,cg25293806,cg09468836
chr19	56048677	56048697	56048688	SP1	1-00625	cg00884041,cg08889843,cg07357091,cg00324018	chr19:56047542-56049469	1-00423,1-03393,1-05946,1-03538,1-01869,1-02290,1-04389,1-05570,1-00150,1-00806,1-02918,1-00625,1-03897,1-06537,1-06690,1-04460,1-07442,1-04523,1-05443	19	cg09364245,cg01416521,cg00149708,cg02363969,cg26288449,cg00884041,cg08889843,cg07357091,cg00324018,cg23774667,cg12168076
chr19	56048682	56048696	56048688	UA3	1-00625	cg00884041,cg08889843,cg07357091,cg00324018	chr19:56047542-56049469	1-00423,1-03393,1-05946,1-03538,1-01869,1-02290,1-04389,1-05570,1-00150,1-00806,1-02918,1-00625,1-03897,1-06537,1-06690,1-04460,1-07442,1-04523,1-05443	19	cg09364245,cg01416521,cg00149708,cg02363969,cg26288449,cg00884041,cg08889843,cg07357091,cg00324018,cg23774667,cg12168076
chr2	946566	946580	946566	CTCF	1-04164	cg11612266,cg23953176	chr2:946647-947635	1-00423,1-04901,1-05153,1-02959,1-02963,1-03001,1-01174,1-03825,1-03991,1-02290,1-04164,1-06506,1-04389	13	cg09426834,cg06865612,cg11612266,cg23953176,cg20193363,cg11691429
chr2	1629283	1629297	1629295	AP2	1-04624	cg05020137,cg05716374,cg26172390,cg19550530,cg01730072	chr2:1628527-1630000	1-04870,1-01384,1-04624	3	cg25955624,cg21803847,cg05020137,cg05716374,cg26172390,cg19550530,cg11559938,cg01730072
chr2	3584507	3584521	3584514	CTCF	1-02264	cg24996440,cg09414061,cg02343254,cg09045963,cg05351204	chr2:3583569-3584775	1-00197,1-04692,1-04865,1-02918,1-02959,1-00625,1-00655,1-03258,1-06321,1-03394,1-00894,1-03627,1-01190,1-02264,1-06506,1-04460,1-07555	17	cg24996440,cg09414061,cg02343254,cg09045963,cg05351204,cg16535565,cg01489567
chr2	11272905	11272918	11272917	MYC	1-03038	cg26722677,cg15704155,cg08936063,cg10334385,cg05517905,cg12453288,cg27471536,cg03251967	chr2:11272365-11273292	1-03038,1-06506	2	cg26722677,cg15704155,cg08936063,cg10334385,cg27641709,cg05517905,cg12453288,cg27471536,cg03251967
chr2	11272906	11272920	11272917	CTCF	1-03038	cg26722677,cg15704155,cg08936063,cg10334385,cg05517905,cg12453288,cg27471536,cg03251967	chr2:11272365-11273292	1-03038,1-06506	2	cg26722677,cg15704155,cg08936063,cg10334385,cg27641709,cg05517905,cg12453288,cg27471536,cg03251967
chr2	11272912	11272922	11272917	UAK26	1-03038	cg26722677,cg15704155,cg08936063,cg10334385,cg05517905,cg12453288,cg27471536,cg03251967	chr2:11272365-11273292	1-03038,1-06506	2	cg26722677,cg15704155,cg08936063,cg10334385,cg27641709,cg05517905,cg12453288,cg27471536,cg03251967
chr2	20442293	20442307	20442307	UAK42	1-03038	cg16727243,cg03425348,cg02591356,cg08044427	chr2:20441904-20442211	1-05174,1-03038,1-00625,1-03639,1-01049,1-03825,1-01869,1-04157,1-06506,1-07555,1-05613	11	cg16727243,cg03425348,cg02591356,cg08044427,cg02156767
chr2	20442298	20442317	20442307	E2F4	1-03038	cg16727243,cg03425348,cg02591356,cg08044427	chr2:20441904-20442211	1-05174,1-03038,1-00625,1-03639,1-01049,1-03825,1-01869,1-04157,1-06506,1-07555,1-05613	11	cg16727243,cg03425348,cg02591356,cg08044427,cg02156767
chr2	20442300	20442321	20442307	UA3	1-03038	cg16727243,cg03425348,cg02591356,cg08044427	chr2:20441904-20442211	1-05174,1-03038,1-00625,1-03639,1-01049,1-03825,1-01869,1-04157,1-06506,1-07555,1-05613	11	cg16727243,cg03425348,cg02591356,cg08044427,cg02156767
chr2	27301984	27301998	27301996	CTCF	1-02769	cg03514843,cg19399165,cg14021880,cg19815863,cg15895197,cg05029532,cg22047282,cg05654832,cg20516209	chr2:27301194-27301944	1-04774,1-04915,1-02769,1-02812,1-02918,1-03059,1-00541,1-05977,1-06321,1-03472,1-03676,1-01049,1-03842,1-03894,1-03897,1-01553,1-01805,1-02183,1-06506,1-04389,1-07278	21	cg03514843,cg19399165,cg14021880,cg19815863,cg15895197,cg05029532,cg22047282,cg05654832,cg20516209
chr2	43903512	43903526	43903524	UA3	1-03665	cg09325404,cg20563666,cg14454477,cg08726338	chr2:43903226-43904012	1-00041,1-00436,1-00770,1-04782,1-04920,1-02544,1-02963,1-00652,1-03374,1-05673,1-05926,1-06321,1-00818,1-03422,1-03437,1-03472,1-03627,1-03665,1-01019,1-03894,1-01238,1-01384,1-01869,1-04472,1-07084,1-04624,1-09064	27	cg17110364,cg09325404,cg11267669,cg14230606,cg09132607,cg02111748,cg18817560,cg13324389,cg20563666,cg14454477,cg08726338
chr2	46523973	46523994	46523977	EGR1	1-02918	cg00555811,cg07623518	chr2:46523074-46524149	1-04893,1-11800,1-05009,1-02918,1-00655,1-05675,1-05911,1-06204,1-00914,1-07004	10	cg14427809,cg00555811,cg17518825,cg07623518,cg00330888
chr2	70314096	70314119	70314114	EGR1	1-03374	cg08479476	chr2:70312491-70313834	1-00046,1-00423,1-00739,1-00806,1-11800,1-00543,1-03374,1-05675,1-00871,1-01049,1-06506,1-06988,1-07419,1-07555,1-05437	15	cg16450677,cg19638749,cg23447131,cg07517201,cg08479476,cg26487157,cg09175843,cg20684112,cg12891177,cg03803211,cg08938475
chr2	70314100	70314114	70314114	NRF1	1-03374	cg08479476	chr2:70312491-70313834	1-00046,1-00423,1-00739,1-00806,1-11800,1-00543,1-03374,1-05675,1-00871,1-01049,1-06506,1-06988,1-07419,1-07555,1-05437	15	cg16450677,cg19638749,cg23447131,cg07517201,cg08479476,cg26487157,cg09175843,cg20684112,cg12891177,cg03803211,cg08938475
chr2	73114505	73114519	73114511	SP1	1-00625	cg24696314,cg06728310,cg19889780	chr2:73113966-73114961	1-00625	1	cg24696314,cg06728310,cg19889780,cg19511045,cg12436443,cg04807855,cg00930762,cg05964953,cg09305687,cg13525064,cg23998381,cg25655069,cg15253672
chr2	73114508	73114522	73114511	CTCF	1-00625	cg24696314,cg06728310,cg19889780	chr2:73113966-73114961	1-00625	1	cg24696314,cg06728310,cg19889780,cg19511045,cg12436443,cg04807855,cg00930762,cg05964953,cg09305687,cg13525064,cg23998381,cg25655069,cg15253672
chr2	74667228	74667242	74667233	SP1	1-05093	cg00610692	chr2:74667679-74670062	1-05093,1-00808,1-06506,1-04774,1-00034,1-04693,1-04865,1-02917,1-02918,1-03038,1-03190,1-03258,1-01075,1-01256,1-01869,1-04157,1-04203,1-04400,1-02408,1-04624,1-09064,1-05476,1-05570,1-03897,1-04389,1-05613	26	cg19863760,cg17992044,cg00610692,cg09692695,cg00326131,cg00689340,cg03719070,cg26676034,cg03295928,cg14481208,cg00658082,cg26090072,cg19515035,cg26986064,cg25573114,cg02797932
chr2	74776235	74776254	74776250	E2F4	1-03897	cg09116068,cg05577344,cg04500896	chr2:74775428-74776570	1-00423,1-00508,1-01019,1-03897,1-04056,1-04112,1-07278	7	cg20412005,cg09116068,cg05577344,cg04500896,cg05736393,cg21109929,cg11150382,cg11806445,cg12655338,cg12161067,cg01906555,cg03663721
chr2	74776239	74776260	74776250	EGR1	1-03897	cg09116068,cg05577344,cg04500896	chr2:74775428-74776570	1-00423,1-00508,1-01019,1-03897,1-04056,1-04112,1-07278	7	cg20412005,cg09116068,cg05577344,cg04500896,cg05736393,cg21109929,cg11150382,cg11806445,cg12655338,cg12161067,cg01906555,cg03663721
chr2	74776243	74776257	74776250	E2F1	1-03897	cg09116068,cg05577344,cg04500896	chr2:74775428-74776570	1-00423,1-00508,1-01019,1-03897,1-04056,1-04112,1-07278	7	cg20412005,cg09116068,cg05577344,cg04500896,cg05736393,cg21109929,cg11150382,cg11806445,cg12655338,cg12161067,cg01906555,cg03663721
chr2	97454195	97454215	97454207	AP2	1-01384	cg02913511,cg23027225,cg21863307,cg07902012	chr2:97454041-97454335	1-01384	1	cg02913511,cg17858844,cg23027225,cg21863307,cg07902012
chr2	105851982	105852000	105851991	AP1	1-05911	cg11064411	chr2:105852797-105854052	1-00304,1-04926,1-04975,1-02627,1-02917,1-05911,1-05946,1-00808,1-00854,1-03538,1-01019,1-01049,1-01174,1-04095,1-01444,1-01869,1-04190,1-06506,1-04367,1-04389,1-02413,1-07084,1-05476,1-05597,1-05635,1-04893,1-02959,1-03894,1-07442,1-04523	30	cg00310410,cg23676956,cg04850045,cg20265528,cg22022881,cg27422857,cg26874229,cg22878388,cg18192325
chr2	106016057	106016071	106016066	CTCF	1-04655	cg06639320,cg17268658,cg22454769	chr2:106014949-106016463	1-00517,1-04652,1-04655,1-04915,1-04920,1-04926,1-00808,1-03627,1-03652,1-01306,1-06506,1-07026,1-04466,1-02413,1-02183	15	cg02054792,cg10349436,cg00824141,cg17291435,cg19753526,cg02445447,cg06639320,cg17268658,cg22454769,cg26344233,cg01928691,cg02231204,cg03136099,cg02709407
chr2	115420123	115420133	115420127	GABP	1-04190	cg01622385,cg24654266,cg24723140,cg21887373	chr2:115419536-115420261	1-00034,1-00071,1-00197,1-04655,1-04835,1-04921,1-04975,1-05007,1-05009,1-02627,1-00655,1-03224,1-03258,1-05846,1-06498,1-03578,1-00982,1-01313,1-02283,1-04190,1-04389,1-07278,1-04589,1-05597,1-05613,1-05635	26	cg19211931,cg19651219,cg22670147,cg01622385,cg24654266,cg18271036,cg24723140,cg21887373
chr2	131513863	131513883	131513875	REST	1-01306	cg26301353,cg23606718	chr2:131512309-131513741	1-05379,1-02918,1-03627,1-01306,1-06506	5	cg16147202,cg13419390,cg01093878,cg19256400,cg05184394,cg26301353,cg17177632,cg10204868,cg18396137,cg13010502,cg25816545,cg23992208,cg16146322,cg25784308,cg24750614,cg13381486,cg20904495,cg09987596,cg18194734,cg04119747,cg01725586,cg11459590
chr2	158184226	158184240	158184228	CTCF	1-04774	cg21261382,cg14022550,cg20284961,cg21563471,cg05081953	chr2:158183333-158184642	1-04774,1-00801,1-04112,1-00508,1-04655,1-04926,1-05009,1-03059,1-02491,1-07278	10	cg20433238,cg03252823,cg10812717,cg21261382,cg14022550,cg20284961,cg21563471,cg05081953,cg18425731
chr2	165811865	165811879	165811865	CTCF-ext	1-00982	cg20485190,cg24777351,cg20641955,cg05090759,cg12301695	chr2:165811764-165812479	1-00347,1-04782,1-04865,1-04926,1-02874,1-05675,1-05926,1-06248,1-06321,1-00894,1-00982,1-03627,1-03652,1-01238,1-02290,1-06506,1-04389,1-04523,1-04588,1-09064	20	cg20485190,cg05181354,cg24777351,cg03464655,cg20641955,cg16376155,cg05339727,cg05090759,cg12301695,cg12753297,cg03702545,cg04143809,cg18460164,cg19396723
chr2	165812126	165812140	165812140	NR3C1	1-00982	cg20485190,cg24777351,cg20641955,cg05090759,cg12301695	chr2:165811764-165812479	1-00347,1-04782,1-04865,1-04926,1-02874,1-05675,1-05926,1-06248,1-06321,1-00894,1-00982,1-03627,1-03652,1-01238,1-02290,1-06506,1-04389,1-04523,1-04588,1-09064	20	cg20485190,cg05181354,cg24777351,cg03464655,cg20641955,cg16376155,cg05339727,cg05090759,cg12301695,cg12753297,cg03702545,cg04143809,cg18460164,cg19396723
chr2	169103365	169103378	169103366	MYC	1-02024	cg19282745	chr2:169104282-169105092	1-00761,1-04774,1-02024,1-02411	4	cg21871154,cg19282745,cg02689023,cg24498376,cg26872305,cg22659356,cg22872692,cg18147479,cg23178697
chr2	169659095	169659115	169659107	ZNF143-ext	1-01313	cg16960758,cg16780603,cg00174992	chr2:169658425-169659183	1-00667,1-03258,1-03639,1-01313,1-02097	5	cg07116337,cg24861006,cg18556822,cg01046382,cg25694915,cg16960758,cg16780603,cg14028115,cg00174992,cg09479286
chr2	173420685	173420706	173420704	EGR1	1-02627	cg10165864,cg01937628,cg13462525	chr2:173419898-173420890	1-00389,1-00423,1-04782,1-02627,1-02874,1-03038	6	cg10165864,cg01937628,cg07833011,cg13462525,cg05186902,cg17679246,cg19538119,cg21044834,cg11787262,cg27262745,cg04340677,cg16433800,cg05702952
chr2	173420691	173420716	173420704	UAK42	1-02627	cg10165864,cg01937628,cg13462525	chr2:173419898-173420890	1-00389,1-00423,1-04782,1-02627,1-02874,1-03038	6	cg10165864,cg01937628,cg07833011,cg13462525,cg05186902,cg17679246,cg19538119,cg21044834,cg11787262,cg27262745,cg04340677,cg16433800,cg05702952
chr2	173420692	173420723	173420704	E2F4	1-02627	cg10165864,cg01937628,cg13462525	chr2:173419898-173420890	1-00389,1-00423,1-04782,1-02627,1-02874,1-03038	6	cg10165864,cg01937628,cg07833011,cg13462525,cg05186902,cg17679246,cg19538119,cg21044834,cg11787262,cg27262745,cg04340677,cg16433800,cg05702952
chr2	173420700	173420714	173420704	E2F1	1-02627	cg10165864,cg01937628,cg13462525	chr2:173419898-173420890	1-00389,1-00423,1-04782,1-02627,1-02874,1-03038	6	cg10165864,cg01937628,cg07833011,cg13462525,cg05186902,cg17679246,cg19538119,cg21044834,cg11787262,cg27262745,cg04340677,cg16433800,cg05702952
chr2	198650831	198650847	198650839	CTCF	1-06498	cg21866259,cg05783139,cg13356896,cg02957700,cg07495363,cg17560332	chr2:198649442-198652350	1-00071,1-00436,1-00667,1-04652,1-02987,1-03422,1-04112,1-04164,1-04466,1-02324,1-02413,1-08788,1-07442,1-07593,1-00652,1-03846,1-02024,1-00312,1-02544,1-03258,1-05673,1-06498,1-03627,1-03639,1-01384,1-01984,1-02290,1-06506,1-04588,1-05476,1-11800,1-03190,1-01805,1-04460	34	cg13329352,cg13641746,cg00361562,cg11031976,cg00982548,cg06077337,cg21300403,cg10547527,cg03433510,cg21279220,cg03614394,cg07734961,cg10124201,cg03774803,cg21866259,cg05783139,cg13356896,cg02957700,cg07495363,cg17565627,cg13706908,cg17560332,cg24589459,cg20577027,cg00926400,cg16002818,cg24141882,cg25009743,cg07732053,cg10456935
chr2	219748291	219748310	219748310	E2F4	1-06321	cg03630015,cg15139857	chr2:219746853-219748022	1-00034,1-00319,1-04975,1-05675,1-06321,1-04071,1-01869,1-04460,1-05597	9	cg14078607,cg19217214,cg12226023,cg03630015,cg15139857
chr2	220298768	220298785	220298773	CREB-ext	1-01256	cg18639966,cg25330143,cg10496184,cg07820064,cg18984724,cg15634877,cg12213062	chr2:220298546-220300243	1-00041,1-04921,1-02959,1-03298,1-05675,1-00808,1-03538,1-01256,1-02234,1-06537,1-06690,1-04389,1-04460,1-02413,1-07278,1-05420,1-05437,1-05597,1-04655,1-07004,1-07593	21	cg22126505,cg18639966,cg14074251,cg25330143,cg10496184,cg25925023,cg07820064,cg18984724,cg15634877,cg12213062,cg23065715,cg07921384,cg20174636,cg13437337,cg17285709
chr2	220298770	220298784	220298773	CTCF	1-01256	cg18639966,cg25330143,cg10496184,cg07820064,cg18984724,cg15634877,cg12213062	chr2:220298546-220300243	1-00041,1-04921,1-02959,1-03298,1-05675,1-00808,1-03538,1-01256,1-02234,1-06537,1-06690,1-04389,1-04460,1-02413,1-07278,1-05420,1-05437,1-05597,1-04655,1-07004,1-07593	21	cg22126505,cg18639966,cg14074251,cg25330143,cg10496184,cg25925023,cg07820064,cg18984724,cg15634877,cg12213062,cg23065715,cg07921384,cg20174636,cg13437337,cg17285709
chr2	223288749	223288763	223288760	EBF1	1-05911	cg16968897,cg10091265,cg11300809	chr2:223288212-223289307	1-00517,1-02987,1-05911,1-03538,1-01444,1-01577,1-04203,1-04389,1-04460,1-05570	10	cg16968897,cg10091265,cg07873848,cg11300809,cg03182958,cg00043095,cg07357987
chr2	233251551	233251565	233251559	NRF1	1-02491	cg13138089,cg02812891,cg24767131,cg25560398	chr2:233250369-233253379	1-02959,1-02413,1-00034,1-00041,1-00046,1-00157,1-00667,1-00739,1-04655,1-04926,1-02652,1-02544,1-02987,1-03190,1-00808,1-04460,1-02491,1-04512,1-00112,1-11800,1-05888,1-04056,1-04071,1-05443,1-05597	25	cg27241845,cg08690379,cg23288337,cg00706683,cg13138089,cg02812891,cg24767131,cg25560398,cg17204652,cg09490371,cg00955035
chr2	236923519	236923548	236923528	EGR1	1-04655	cg14226755,cg11007962	chr2:236923321-236924311	1-00304,1-04652,1-04655,1-02959,1-03059,1-03393,1-05977,1-06321,1-00876,1-03894,1-02413,1-04537	12	cg14226755,cg11007962,cg20128773,cg16878889,cg26641996
chr2	238832346	238832360	238832354	UAK42	1-01049	cg06728658,cg02349186,cg21122225	chr2:238832201-238832778	1-00112,1-04920,1-00894,1-01049,1-04333	5	cg06728658,cg02349186,cg21122225,cg03098024
chr2	239140366	239140380	239140376	ZNF143	1-00174	cg24534135,cg24079051,cg02135859	chr2:239139517-239141044	1-00112,1-04865,1-04901,1-02876,1-03059,1-05999,1-03437,1-03472,1-01019,1-01049,1-04095,1-01306,1-01577,1-01805,1-04367,1-04376,1-00174	17	cg02536451,cg06102419,cg11904906,cg07323141,cg23497383,cg13530938,cg06732439,cg04166618,cg12608247,cg24534135,cg24079051,cg06497612,cg02135859,cg08209614,cg03754128,cg24375999
chr2	239140370	239140390	239140376	ZNF143-ext	1-00174	cg24534135,cg24079051,cg02135859	chr2:239139517-239141044	1-00112,1-04865,1-04901,1-02876,1-03059,1-05999,1-03437,1-03472,1-01019,1-01049,1-04095,1-01306,1-01577,1-01805,1-04367,1-04376,1-00174	17	cg02536451,cg06102419,cg11904906,cg07323141,cg23497383,cg13530938,cg06732439,cg04166618,cg12608247,cg24534135,cg24079051,cg06497612,cg02135859,cg08209614,cg03754128,cg24375999
chr2	241075901	241075915	241075904	E2F1	1-02324	cg13749477,cg22062537,cg07628769,cg19757382,cg20221591,cg26154534,cg17342071,cg06717460,cg26306091	chr2:241075519-241077067	1-00080,1-00150,1-00197,1-04782,1-05153,1-05379,1-03190,1-00543,1-03224,1-05946,1-00818,1-01019,1-01045,1-01190,1-03825,1-01577,1-02283,1-06506,1-07004,1-02324,1-04523,1-05420,1-05443,1-05476,1-05613,1-02918,1-04252	27	cg23973558,cg15950627,cg01358740,cg14342838,cg12629245,cg19045013,cg25823214,cg19638398,cg13749477,cg22062537,cg07628769,cg20783424,cg19757382,cg20221591,cg26154534,cg17342071,cg21300895,cg08045488,cg06717460,cg26306091,cg12495591,cg21404933,cg22641902,cg22993878,cg03444566,cg08800777,cg06797800
chr2	241497508	241497522	241497516	SP1	1-00625	cg07592361,cg25810938,cg13604246,cg23964682,cg15766075,cg11821086,cg20002504,cg13198503,cg13030331	chr2:241496829-241498222	1-00517,1-02769,1-04631,1-03038,1-00625,1-06321,1-03627,1-03639,1-03825,1-02260,1-04252	11	cg07592361,cg25810938,cg13604246,cg23964682,cg15766075,cg11821086,cg20002504,cg13198503,cg13030331,cg27504117,cg00840370,cg14908680,cg04978266,cg24958325
chr2	241563880	241563890	241563888	USF	1-04540	cg11307478,cg01484134	chr2:241562423-241563348,chr2:241564472-241564944	1-00770,1-04782,1-04975,1-02987,1-00610,1-00808,1-03538,1-01017,1-01049,1-04071,1-04095,1-02097,1-04465,1-02324,1-02411,1-02413,1-07084,1-04540,1-05437,1-05635,1-00770,1-04893,1-05009,1-02627,1-02769,1-04631,1-03059,1-06498,1-01017,1-01049,1-01075,1-04071,1-02097,1-04190,1-04466,1-02411	36	cg21066950,cg13760479,cg20848212,cg12485972,cg15611351,cg09258553,cg09499095,cg26250154,cg14927745,cg20428033,cg27495812,cg11307478,cg01484134,cg21093020
chr2	241563880	241563891	241563888	BHLHE40	1-04540	cg11307478,cg01484134	chr2:241562423-241563348,chr2:241564472-241564944	1-00770,1-04782,1-04975,1-02987,1-00610,1-00808,1-03538,1-01017,1-01049,1-04071,1-04095,1-02097,1-04465,1-02324,1-02411,1-02413,1-07084,1-04540,1-05437,1-05635,1-00770,1-04893,1-05009,1-02627,1-02769,1-04631,1-03059,1-06498,1-01017,1-01049,1-01075,1-04071,1-02097,1-04190,1-04466,1-02411	36	cg21066950,cg13760479,cg20848212,cg12485972,cg15611351,cg09258553,cg09499095,cg26250154,cg14927745,cg20428033,cg27495812,cg11307478,cg01484134,cg21093020
chr2	242294746	242294766	242294752	ZNF143-ext	1-04835	cg00707741,cg03538275,cg06643020	chr2:242294422-242295779	1-00041,1-00157,1-00423,1-00667,1-04835,1-02874,1-06321,1-00808,1-03665,1-06506,1-02411,1-07386,1-04588	13	cg21450154,cg00707741,cg04955912,cg03538275,cg06643020,cg24246238,cg15378253,cg10021735,cg14187712,cg06395280,cg26202358
chr2	242448201	242448221	242448204	ZNF143-ext	1-06248	cg01248010,cg22193247,cg21144270,cg18256192,cg22068494,cg22119921,cg18997635	chr2:242447848-242449766	1-06506,1-06248	2	cg06708304,cg14172532,cg25798000,cg12903924,cg20896338,cg02344857,cg10944116,cg01500066,cg01490793,cg01248010,cg22193247,cg21144270,cg08129953,cg18256192,cg22068494,cg22119921,cg18997635,cg26679055,cg26570680,cg05758480,cg24655066,cg24110296
chr20	3219974	3219995	3219974	EGR1	1-07555	cg05110133	chr20:3218144-3219466	1-04719,1-04774,1-03159,1-00541,1-06370,1-00825,1-06506,1-07555	8	cg08284598,cg18408783,cg20323491,cg03738669,cg11004890,cg22928082,cg17037355,cg23413506,cg04969944,cg10748765,cg07454239
chr20	20433139	20433146	20433146	UAK29	1-00914	cg23145794,cg03048889,cg00175573,cg24994127	chr20:20433061-20433329	1-00914	1	cg23145794,cg03048889,cg00175573,cg24994127
chr20	20433142	20433152	20433146	UAK35	1-00914	cg23145794,cg03048889,cg00175573,cg24994127	chr20:20433061-20433329	1-00914	1	cg23145794,cg03048889,cg00175573,cg24994127
chr20	20433144	20433154	20433146	ELF1	1-00914	cg23145794,cg03048889,cg00175573,cg24994127	chr20:20433061-20433329	1-00914	1	cg23145794,cg03048889,cg00175573,cg24994127
chr20	20433144	20433154	20433146	GABP	1-00914	cg23145794,cg03048889,cg00175573,cg24994127	chr20:20433061-20433329	1-00914	1	cg23145794,cg03048889,cg00175573,cg24994127
chr20	25129474	25129488	25129485	NRF1	1-03665	cg11632685,cg20310608	chr20:25128128-25129937	1-00436,1-04865,1-04926,1-02959,1-00655,1-05673,1-05675,1-00808,1-00894,1-03627,1-03665,1-01075,1-01553,1-01805,1-06506,1-04466,1-02411,1-02413,1-02491,1-07442,1-05597,1-04920,1-02812	23	cg16283496,cg04377618,cg13965049,cg27158481,cg15069551,cg11632685,cg20310608,cg20017761,cg05446860,cg01505767,cg04299389,cg22273939,cg18009321,cg11724135,cg22645427,cg05908371,cg16265348,cg08941457,cg06741354
chr20	25129474	25129488	25129485	NRF1	1-04466	cg15069551,cg11632685,cg20310608,cg20017761,cg05446860	chr20:25128128-25129937	1-00436,1-04865,1-04926,1-02959,1-00655,1-05673,1-05675,1-00808,1-00894,1-03627,1-03665,1-01075,1-01553,1-01805,1-06506,1-04466,1-02411,1-02413,1-02491,1-07442,1-05597,1-04920,1-02812	23	cg16283496,cg04377618,cg13965049,cg27158481,cg15069551,cg11632685,cg20310608,cg20017761,cg05446860,cg01505767,cg04299389,cg22273939,cg18009321,cg11724135,cg22645427,cg05908371,cg16265348,cg08941457,cg06741354
chr20	25129476	25129491	25129485	MAX	1-03665	cg11632685,cg20310608	chr20:25128128-25129937	1-00436,1-04865,1-04926,1-02959,1-00655,1-05673,1-05675,1-00808,1-00894,1-03627,1-03665,1-01075,1-01553,1-01805,1-06506,1-04466,1-02411,1-02413,1-02491,1-07442,1-05597,1-04920,1-02812	23	cg16283496,cg04377618,cg13965049,cg27158481,cg15069551,cg11632685,cg20310608,cg20017761,cg05446860,cg01505767,cg04299389,cg22273939,cg18009321,cg11724135,cg22645427,cg05908371,cg16265348,cg08941457,cg06741354
chr20	25129476	25129491	25129485	MAX	1-04466	cg15069551,cg11632685,cg20310608,cg20017761,cg05446860	chr20:25128128-25129937	1-00436,1-04865,1-04926,1-02959,1-00655,1-05673,1-05675,1-00808,1-00894,1-03627,1-03665,1-01075,1-01553,1-01805,1-06506,1-04466,1-02411,1-02413,1-02491,1-07442,1-05597,1-04920,1-02812	23	cg16283496,cg04377618,cg13965049,cg27158481,cg15069551,cg11632685,cg20310608,cg20017761,cg05446860,cg01505767,cg04299389,cg22273939,cg18009321,cg11724135,cg22645427,cg05908371,cg16265348,cg08941457,cg06741354
chr20	25129478	25129487	25129485	BHLHE40	1-03665	cg11632685,cg20310608	chr20:25128128-25129937	1-00436,1-04865,1-04926,1-02959,1-00655,1-05673,1-05675,1-00808,1-00894,1-03627,1-03665,1-01075,1-01553,1-01805,1-06506,1-04466,1-02411,1-02413,1-02491,1-07442,1-05597,1-04920,1-02812	23	cg16283496,cg04377618,cg13965049,cg27158481,cg15069551,cg11632685,cg20310608,cg20017761,cg05446860,cg01505767,cg04299389,cg22273939,cg18009321,cg11724135,cg22645427,cg05908371,cg16265348,cg08941457,cg06741354
chr20	25129478	25129487	25129485	BHLHE40	1-04466	cg15069551,cg11632685,cg20310608,cg20017761,cg05446860	chr20:25128128-25129937	1-00436,1-04865,1-04926,1-02959,1-00655,1-05673,1-05675,1-00808,1-00894,1-03627,1-03665,1-01075,1-01553,1-01805,1-06506,1-04466,1-02411,1-02413,1-02491,1-07442,1-05597,1-04920,1-02812	23	cg16283496,cg04377618,cg13965049,cg27158481,cg15069551,cg11632685,cg20310608,cg20017761,cg05446860,cg01505767,cg04299389,cg22273939,cg18009321,cg11724135,cg22645427,cg05908371,cg16265348,cg08941457,cg06741354
chr20	35202301	35202315	35202311	CTCF	1-04624	cg25428244	chr20:35201207-35201801	1-04624	1	cg06588605,cg11263351,cg01275297,cg25428244,cg18078545,cg23212248,cg20969896,cg23459915
chr20	39765858	39765873	39765868	PAX5	1-02491	cg06493829,cg24899577	chr20:39765947-39767491	1-05846,1-01019,1-04460,1-02491	4	cg01147995,cg09960727,cg08731143,cg10848882,cg11602459,cg22808989,cg18350866,cg27523523,cg23761264,cg21260072,cg06493829,cg24899577,cg22642457,cg06457011
chr20	56255525	56255540	56255534	NFKB1	1-05597	cg15411871,cg08658892	chr20:56256273-56256843	1-04920,1-05597	2	cg15411871,cg08658892,cg00024998
chr20	57425855	57425868	57425865	MYC	1-00319	cg04677683	chr20:57425514-57428474	1-00046,1-00304,1-00389,1-04774,1-11800,1-02963,1-07004,1-07442,1-00041,1-00761,1-04926,1-02841,1-02926,1-02959,1-00655,1-00876,1-02283,1-04367,1-05597,1-00319,1-02652,1-03059,1-06248,1-06321,1-01017,1-03894,1-07551,1-04624,1-03038,1-03538,1-03627,1-03676,1-01869,1-02097,1-04157,1-00702,1-03258,1-03652,1-03825,1-05613,1-04901,1-00739,1-00543,1-00871,1-05093	45	cg03547757,cg18935491,cg24203465,cg26102503,cg03344105,cg14660776,cg19592829,cg20401058,cg09123158,cg19140375,cg11669839,cg17841572,cg25229306,cg14482474,cg08166863,cg11285807,cg06200857,cg08091561,cg22860367,cg07947033,cg06693667,cg04677683,cg15160445,cg25326570,cg23249369,cg01715551,cg14176797,cg04457481,cg27262796,cg21938532,cg22989942,cg18224653,cg14309385,cg05309239,cg12573482,cg06324048,cg2…
chr20	57426133	57426154	57426140	EGR1	1-03825	cg14660776,cg20401058,cg22860367	chr20:57425514-57428474	1-00046,1-00304,1-00389,1-04774,1-11800,1-02963,1-07004,1-07442,1-00041,1-00761,1-04926,1-02841,1-02926,1-02959,1-00655,1-00876,1-02283,1-04367,1-05597,1-00319,1-02652,1-03059,1-06248,1-06321,1-01017,1-03894,1-07551,1-04624,1-03038,1-03538,1-03627,1-03676,1-01869,1-02097,1-04157,1-00702,1-03258,1-03652,1-03825,1-05613,1-04901,1-00739,1-00543,1-00871,1-05093	45	cg03547757,cg18935491,cg24203465,cg26102503,cg03344105,cg14660776,cg19592829,cg20401058,cg09123158,cg19140375,cg11669839,cg17841572,cg25229306,cg14482474,cg08166863,cg11285807,cg06200857,cg08091561,cg22860367,cg07947033,cg06693667,cg04677683,cg15160445,cg25326570,cg23249369,cg01715551,cg14176797,cg04457481,cg27262796,cg21938532,cg22989942,cg18224653,cg14309385,cg05309239,cg12573482,cg06324048,cg2…
chr20	61641771	61641792	61641782	EGR1	1-01384	cg16443667,cg07462762,cg24330729	chr20:61639276-61641994	1-04911,1-04921,1-03159,1-01384,1-00400,1-04258,1-00071	7	cg00377358,cg01057741,cg04010387,cg04995536,cg21389265,cg03549563,cg16443667,cg07462762,cg24330729
chr20	61641774	61641791	61641782	UAK42	1-01384	cg16443667,cg07462762,cg24330729	chr20:61639276-61641994	1-04911,1-04921,1-03159,1-01384,1-00400,1-04258,1-00071	7	cg00377358,cg01057741,cg04010387,cg04995536,cg21389265,cg03549563,cg16443667,cg07462762,cg24330729
chr20	61641779	61641786	61641782	V_PU1_Q4	1-01384	cg16443667,cg07462762,cg24330729	chr20:61639276-61641994	1-04911,1-04921,1-03159,1-01384,1-00400,1-04258,1-00071	7	cg00377358,cg01057741,cg04010387,cg04995536,cg21389265,cg03549563,cg16443667,cg07462762,cg24330729
chr20	62169430	62169444	62169432	CTCF	1-06498	cg13520525,cg14601357,cg17474524,cg14010720,cg20430807,cg06694811,cg24480577	chr20:62167941-62169335	1-06498,1-01019,1-01242,1-01984	4	cg10285525,cg13520525,cg21484834,cg25143652,cg14601357,cg17474524,cg14010720,cg20430807,cg06694811,cg24480577
chr20	62169432	62169446	62169432	RXRA	1-06498	cg13520525,cg14601357,cg17474524,cg14010720,cg20430807,cg06694811,cg24480577	chr20:62167941-62169335	1-06498,1-01019,1-01242,1-01984	4	cg10285525,cg13520525,cg21484834,cg25143652,cg14601357,cg17474524,cg14010720,cg20430807,cg06694811,cg24480577
chr20	62169432	62169446	62169432	UA3	1-06498	cg13520525,cg14601357,cg17474524,cg14010720,cg20430807,cg06694811,cg24480577	chr20:62167941-62169335	1-06498,1-01019,1-01242,1-01984	4	cg10285525,cg13520525,cg21484834,cg25143652,cg14601357,cg17474524,cg14010720,cg20430807,cg06694811,cg24480577
chr20	62169432	62169452	62169432	UAK25	1-06498	cg13520525,cg14601357,cg17474524,cg14010720,cg20430807,cg06694811,cg24480577	chr20:62167941-62169335	1-06498,1-01019,1-01242,1-01984	4	cg10285525,cg13520525,cg21484834,cg25143652,cg14601357,cg17474524,cg14010720,cg20430807,cg06694811,cg24480577
chr20	62179208	62179218	62179209	UAK27	1-02963	cg17793372,cg24122814,cg22442730	chr20:62178497-62179753	1-00423,1-00436,1-00801,1-02963,1-03038,1-03059,1-00625,1-05977,1-01017,1-03627,1-01306,1-01869,1-06506,1-04400,1-04460,1-04506,1-04523,1-04624,1-05597,1-06988	20	cg24818238,cg03330516,cg00206407,cg15417758,cg17793372,cg24122814,cg22442730,cg00369372,cg12064459
chr20	62179208	62179222	62179209	CTCF	1-02963	cg17793372,cg24122814,cg22442730	chr20:62178497-62179753	1-00423,1-00436,1-00801,1-02963,1-03038,1-03059,1-00625,1-05977,1-01017,1-03627,1-01306,1-01869,1-06506,1-04400,1-04460,1-04506,1-04523,1-04624,1-05597,1-06988	20	cg24818238,cg03330516,cg00206407,cg15417758,cg17793372,cg24122814,cg22442730,cg00369372,cg12064459
chr20	62289380	62289394	62289380	ZNF263	1-04624	cg15320416,cg14304809,cg04871384	chr20:62288151-62289983	1-00423,1-00645,1-03393,1-06370,1-03394,1-03639,1-01553,1-01577,1-04164,1-04258,1-06506,1-04460,1-02425,1-07419,1-04624	15	cg17509409,cg18287711,cg05358404,cg15542777,cg15320416,cg14304809,cg04871384,cg09824849,cg22100873,cg19811473,cg24092470,cg25984973,cg15788645,cg27236539,cg11234026,cg24549085,cg09062397,cg17545146
chr20	62680815	62680838	62680824	E2F4	1-00517	cg06602546,cg04881720,cg06649044	chr20:62679254-62681429	1-00517,1-00739,1-04655,1-02959,1-02987,1-03190,1-00914,1-01053,1-01174,1-04376,1-04333,1-04465	12	cg01355392,cg02231404,cg22138735,cg06602546,cg04881720,cg08855301,cg23509896,cg12630336,cg18194354,cg06649044,cg13564289,cg13917916,cg26033254,cg14785511,cg20476223,cg03737691,cg24199599,cg26825412
chr21	36259296	36259310	36259308	NRF1	1-03676	cg01664727,cg26974661,cg20418711,cg00994804,cg14937633,cg06758350,cg09889857,cg12083928	chr21:36258422-36259695	1-00041,1-00112,1-00150,1-00197,1-00304,1-00319,1-00436,1-00517,1-00667,1-04893,1-05153,1-02652,1-02926,1-00625,1-03298,1-05888,1-03437,1-00894,1-03676,1-01019,1-01049,1-01190,1-03897,1-04056,1-04071,1-01444,1-01553,1-02241,1-02260,1-04203,1-07033,1-04380,1-07278,1-09064,1-05675,1-04472,1-03825	37	cg01664727,cg03142697,cg26974661,cg02869559,cg20418711,cg12477880,cg00994804,cg14937633,cg06758350,cg09889857,cg12083928,cg07511671
chr21	36260581	36260595	36260588	GATA3	1-00625	cg09889857,cg12083928,cg07511671	chr21:36258422-36259695	1-00041,1-00112,1-00150,1-00197,1-00304,1-00319,1-00436,1-00517,1-00667,1-04893,1-05153,1-02652,1-02926,1-00625,1-03298,1-05888,1-03437,1-00894,1-03676,1-01019,1-01049,1-01190,1-03897,1-04056,1-04071,1-01444,1-01553,1-02241,1-02260,1-04203,1-07033,1-04380,1-07278,1-09064,1-05675,1-04472,1-03825	37	cg01664727,cg03142697,cg26974661,cg02869559,cg20418711,cg12477880,cg00994804,cg14937633,cg06758350,cg09889857,cg12083928,cg07511671
chr21	37915192	37915206	37915205	v-JUN	1-04624	cg23034373,cg00293996	chr21:37915043-37916229	1-00390,1-00761,1-04655,1-04835,1-04884,1-04926,1-11800,1-03258,1-05726,1-05888,1-06204,1-06321,1-00818,1-00913,1-03627,1-03676,1-01075,1-01869,1-01989,1-02260,1-06506,1-06690,1-06988,1-04389,1-04472,1-07442,1-04537,1-04624	28	cg20643029,cg12426652,cg04478905,cg05351803,cg05275307,cg16957637,cg01668281,cg13363596,cg23034373,cg00293996,cg00279943,cg09362437
chr21	40759609	40759623	40759611	UAK42	1-06321	cg19761502,cg04378774,cg27119318,cg21736411,cg19684207,cg15977137	chr21:40757690-40760634	1-03846,1-04540,1-00197,1-03038,1-00652,1-06321,1-03649,1-04512,1-00046,1-04774,1-02874,1-05673,1-01049,1-04113,1-01306,1-02183,1-06506,1-04367,1-05476,1-05635	20	cg00606841,cg22858667,cg26710963,cg21297395,cg21459460,cg20987349,cg09436924,cg19761502,cg04378774,cg27119318,cg21736411,cg19684207,cg15977137,cg25791881,cg12054554
chr21	40759760	40759774	40759771	UAK42	1-03649	cg19761502,cg04378774,cg27119318,cg21736411,cg19684207	chr21:40757690-40760634	1-03846,1-04540,1-00197,1-03038,1-00652,1-06321,1-03649,1-04512,1-00046,1-04774,1-02874,1-05673,1-01049,1-04113,1-01306,1-02183,1-06506,1-04367,1-05476,1-05635	20	cg00606841,cg22858667,cg26710963,cg21297395,cg21459460,cg20987349,cg09436924,cg19761502,cg04378774,cg27119318,cg21736411,cg19684207,cg15977137,cg25791881,cg12054554
chr21	42741512	42741526	42741520	CTCF	1-00610	cg22778903,cg06102954,cg22901652,cg13511117	chr21:42741697-42742433	1-00174,1-00702,1-04692,1-04911,1-04921,1-04926,1-05093,1-05124,1-02841,1-04631,1-00610,1-03394,1-03538,1-03996,1-04095,1-01242,1-01306,1-01869,1-04367,1-02324,1-07278,1-07555	22	cg22778903,cg06102954,cg09741125,cg22901652,cg13511117,cg21534630
chr21	46851180	46851199	46851199	ESR1	1-05420	cg15844419,cg03152428,cg24483767,cg12668523	chr21:46849939-46851113	1-00797,1-04719,1-03190,1-05911,1-05946,1-00825,1-03649,1-04056,1-01242,1-07278,1-07386,1-00541,1-04624,1-05420	14	cg21242863,cg22978915,cg00937175,cg15844419,cg03152428,cg24483767,cg12668523
chr22	18632868	18632883	18632876	PAX5	1-04139	cg27281093,cg18699242,cg01963623,cg02169692	chr22:18631456-18633124	1-00197,1-00400,1-00702,1-04693,1-02812,1-03059,1-03538,1-00894,1-03842,1-01238,1-04139,1-04157,1-06690,1-07555,1-04512,1-04589,1-02627,1-05476	18	cg12987761,cg11243159,cg27281093,cg18699242,cg01963623,cg02169692,cg00077299,cg08607755,cg07964128,cg02518889,cg01246421,cg08205655,cg10685559
chr22	19753403	19753422	19753417	E2F4	1-06690	cg17338254	chr22:19750917-19752870	1-00034,1-00400,1-04921,1-11800,1-02959,1-03159,1-00625,1-03538,1-00913,1-04071,1-04113,1-02097,1-02234,1-04190,1-04258,1-06690,1-06988,1-04389,1-04460,1-05420,1-05437,1-00112,1-00801,1-05675	24	cg24152179,cg23573129,cg19092981,cg10047755,cg24345184,cg00720629,cg17338254,cg04679902
chr22	20193867	20193879	20193872	UA2	1-04588	cg00819949,cg22017656,cg24607300	chr22:20193980-20194555	1-04588	1	cg22017656,cg24607300,cg07422042
chr22	20193869	20193883	20193872	SP1	1-04588	cg00819949,cg22017656,cg24607300	chr22:20193980-20194555	1-04588	1	cg22017656,cg24607300,cg07422042
chr22	22006595	22006609	22006601	UAK42	1-04056	cg13879495,cg02473781,cg11673244,cg16244770,cg04282607	chr22:22006200-22007634	1-04056,1-00319,1-00423,1-02234,1-02260	5	cg22678932,cg24330297,cg12155013,cg14030055,cg02473781,cg11673244,cg16244770,cg04282607,cg16974014,cg03328201
chr22	29426734	29426748	29426746	ZNF263	1-01174	cg02784809,cg13609948	chr22:29426831-29428109	1-00174,1-05093,1-01984,1-02097,1-02283,1-04157,1-06643,1-04655,1-03298,1-00808,1-01174,1-03897,1-04376,1-05570	14	cg03027661,cg08020619,cg02784809,cg13609948,cg07127410,cg04219468
chr22	29426735	29426749	29426746	SP1	1-01174	cg02784809,cg13609948	chr22:29426831-29428109	1-00174,1-05093,1-01984,1-02097,1-02283,1-04157,1-06643,1-04655,1-03298,1-00808,1-01174,1-03897,1-04376,1-05570	14	cg03027661,cg08020619,cg02784809,cg13609948,cg07127410,cg04219468
chr22	29426745	29426756	29426746	UA9	1-01174	cg02784809,cg13609948	chr22:29426831-29428109	1-00174,1-05093,1-01984,1-02097,1-02283,1-04157,1-06643,1-04655,1-03298,1-00808,1-01174,1-03897,1-04376,1-05570	14	cg03027661,cg08020619,cg02784809,cg13609948,cg07127410,cg04219468
chr22	38966249	38966263	38966255	SP1	1-00041	cg02142098,cg19414598,cg10404749,cg12286158	chr22:38965410-38966167	1-00041,1-05846,1-01238,1-04270	4	cg24653655,cg13844454,cg02142098,cg19414598,cg10404749,cg20120491,cg01867433,cg04713951
chr22	42095499	42095518	42095517	E2F4	1-00389	cg10296410,cg10384919,cg22476848,cg22153239	chr22:42094895-42095961	1-00304,1-00389,1-05379,1-03038,1-03190,1-03649,1-04071,1-01984,1-06506	9	cg17471677,cg23592953,cg20522370,cg10296410,cg10384919,cg22476848,cg22804236,cg11260046,cg22153239,cg10627301
chr22	42095499	42095518	42095517	E2F4	1-03038	cg20522370,cg10296410,cg10384919,cg22476848,cg22804236,cg22153239	chr22:42094895-42095961	1-00304,1-00389,1-05379,1-03038,1-03190,1-03649,1-04071,1-01984,1-06506	9	cg17471677,cg23592953,cg20522370,cg10296410,cg10384919,cg22476848,cg22804236,cg11260046,cg22153239,cg10627301
chr22	47169194	47169204	47169204	TCF3	1-04466	cg21143561	chr22:47169226-47169977	1-00046,1-04693,1-04901,1-02900,1-02959,1-03059,1-03191,1-05726,1-05946,1-06204,1-01049,1-01238,1-04465,1-04466,1-02425,1-08788,1-07386,1-04588	18	cg08161306,cg25916883,cg01772186,cg02321845,cg16053386,cg03203801,cg21143561
chr3	9988980	9988994	9988989	CTCF	1-05977	cg01142302,cg16533830,cg10160312,cg11732190,cg05851542	chr3:9988143-9989667	1-00249,1-00304,1-00423,1-05093,1-05977,1-00874,1-03422,1-00876,1-00982,1-01984,1-04380	11	cg02725398,cg01142302,cg16533830,cg24065312,cg10160312,cg11732190,cg05851542,cg25717917,cg12325049
chr3	15469102	15469125	15469114	EGR1	1-04466	cg11004284	chr3:15469316-15470300	1-00034,1-04920,1-05675,1-06506,1-04460,1-04466,1-05597	7	cg20238978,cg19111042,cg11004284,cg01495895,cg03482593
chr3	45635618	45635638	45635630	REST	1-05999	cg02336827,cg03534662,cg04037228	chr3:45635222-45636387	1-00344,1-04782,1-11800,1-02918,1-03298,1-05675,1-03897,1-04258,1-06506,1-02413,1-04893,1-04901,1-00543,1-05999,1-00808,1-03665,1-04071,1-01984	18	cg12902719,cg16532711,cg05460370,cg10545536,cg24652001,cg08534342,cg09608765,cg18779283,cg02336827,cg03534662,cg16127364,cg04037228
chr3	48507599	48507620	48507608	EGR1	1-07026	cg27340749,cg08477641,cg09882118	chr3:48506167-48508392	1-00652,1-00304,1-04920,1-00543,1-01984,1-06506,1-04465,1-04466,1-07026,1-00150	10	cg02348830,cg16014122,cg13943523,cg06070951,cg17825870,cg26345969,cg06350837,cg16786166,cg17631451,cg27340749,cg08477641,cg09692335,cg26029997,cg19091784,cg09882118,cg21788755
chr3	48507604	48507618	48507608	SP1	1-07026	cg27340749,cg08477641,cg09882118	chr3:48506167-48508392	1-00652,1-00304,1-04920,1-00543,1-01984,1-06506,1-04465,1-04466,1-07026,1-00150	10	cg02348830,cg16014122,cg13943523,cg06070951,cg17825870,cg26345969,cg06350837,cg16786166,cg17631451,cg27340749,cg08477641,cg09692335,cg26029997,cg19091784,cg09882118,cg21788755
chr3	48936446	48936460	48936449	UAK42	1-01989	cg23732368,cg22919115,cg04050646,cg05964212	chr3:48935932-48936980	1-01989	1	cg20495332,cg20159072,cg23732368,cg18164983,cg18630857,cg25624927,cg15588941,cg22919115,cg04050646,cg05964212
chr3	49171274	49171289	49171287	UAK45	1-02411	cg02954987,cg08234664,cg05654765,cg14099457,cg03732535,cg05323436	chr3:49170497-49171186	1-00041,1-00702,1-00797,1-02959,1-00541,1-05999,1-06370,1-03578,1-03665,1-01049,1-03897,1-04056,1-04112,1-01989,1-04389,1-04460,1-02411,1-02413,1-07278,1-07593,1-04523,1-05613	22	cg04885759,cg02954987,cg08234664,cg05654765,cg14099457,cg03732535,cg05323436
chr3	49203892	49203906	49203896	CTCF	1-01045	cg19066391,cg16171534,cg23015407	chr3:49203315-49204549	1-01045	1	cg24393498,cg02337062,cg04197195,cg19890469,cg10282524,cg11642501,cg02705835,cg22527345,cg19066391,cg16171534,cg23015407,cg16302570,cg06144505
chr3	49203896	49203906	49203896	ZNF281	1-01045	cg19066391,cg16171534,cg23015407	chr3:49203315-49204549	1-01045	1	cg24393498,cg02337062,cg04197195,cg19890469,cg10282524,cg11642501,cg02705835,cg22527345,cg19066391,cg16171534,cg23015407,cg16302570,cg06144505
chr3	51740945	51740972	51740955	EGR1	1-03472	cg25693132,cg00664406,cg00303541,cg21213853	chr3:51740200-51741474	1-00517,1-04655,1-04631,1-02959,1-00543,1-06204,1-03472,1-00914,1-03627,1-03639,1-03652,1-01019,1-01053,1-03897,1-04071,1-01306,1-01553,1-02234,1-04389,1-02413,1-04512,1-00508,1-00667,1-03538,1-07278	25	cg13139998,cg22739025,cg25693132,cg21899500,cg00664406,cg04453050,cg26079664,cg00303541,cg21213853
chr3	51740946	51740966	51740955	UAK42	1-03472	cg25693132,cg00664406,cg00303541,cg21213853	chr3:51740200-51741474	1-00517,1-04655,1-04631,1-02959,1-00543,1-06204,1-03472,1-00914,1-03627,1-03639,1-03652,1-01019,1-01053,1-03897,1-04071,1-01306,1-01553,1-02234,1-04389,1-02413,1-04512,1-00508,1-00667,1-03538,1-07278	25	cg13139998,cg22739025,cg25693132,cg21899500,cg00664406,cg04453050,cg26079664,cg00303541,cg21213853
chr3	51740950	51740964	51740955	SP1	1-03472	cg25693132,cg00664406,cg00303541,cg21213853	chr3:51740200-51741474	1-00517,1-04655,1-04631,1-02959,1-00543,1-06204,1-03472,1-00914,1-03627,1-03639,1-03652,1-01019,1-01053,1-03897,1-04071,1-01306,1-01553,1-02234,1-04389,1-02413,1-04512,1-00508,1-00667,1-03538,1-07278	25	cg13139998,cg22739025,cg25693132,cg21899500,cg00664406,cg04453050,cg26079664,cg00303541,cg21213853
chr3	51740951	51740961	51740955	ZNF281	1-03472	cg25693132,cg00664406,cg00303541,cg21213853	chr3:51740200-51741474	1-00517,1-04655,1-04631,1-02959,1-00543,1-06204,1-03472,1-00914,1-03627,1-03639,1-03652,1-01019,1-01053,1-03897,1-04071,1-01306,1-01553,1-02234,1-04389,1-02413,1-04512,1-00508,1-00667,1-03538,1-07278	25	cg13139998,cg22739025,cg25693132,cg21899500,cg00664406,cg04453050,cg26079664,cg00303541,cg21213853
chr3	111805250	111805260	111805255	USF	1-05360	cg11874323,cg14018690,cg21572731,cg05570980,cg07741984,cg14042799	chr3:111804342-111805409	1-05360,1-04389	2	cg00758374,cg11874323,cg14018690,cg21572731,cg05570980,cg07741984,cg22442032,cg12794691,cg10239460,cg23215715,cg06807989,cg21336049,cg05756178,cg04945395
chr3	132441796	132441810	132441808	UAK42	1-02411	cg26061548	chr3:132439677-132441374	1-04865,1-02097,1-06506,1-02411	4	cg03420443,cg05218882,cg21088158,cg23995249,cg24234088,cg24015850,cg15688370,cg06782849,cg05093860,cg10414269,cg05531044,cg26061548,cg20789954,cg17462381,cg01412450
chr3	132441798	132441812	132441808	ZNF263	1-02411	cg26061548	chr3:132439677-132441374	1-04865,1-02097,1-06506,1-02411	4	cg03420443,cg05218882,cg21088158,cg23995249,cg24234088,cg24015850,cg15688370,cg06782849,cg05093860,cg10414269,cg05531044,cg26061548,cg20789954,cg17462381,cg01412450
chr3	132441807	132441821	132441808	SP1	1-02411	cg26061548	chr3:132439677-132441374	1-04865,1-02097,1-06506,1-02411	4	cg03420443,cg05218882,cg21088158,cg23995249,cg24234088,cg24015850,cg15688370,cg06782849,cg05093860,cg10414269,cg05531044,cg26061548,cg20789954,cg17462381,cg01412450
chr3	185000752	185000766	185000764	v-JUN	1-01075	cg00636368,cg22464548,cg01237757,cg10542883,cg05480594,cg07057670,cg09249404	chr3:185000207-185001721	1-05379,1-01075,1-04252,1-06506,1-04299,1-04460	6	cg07633618,cg18949028,cg00636368,cg22464548,cg01237757,cg10542883,cg05480594,cg07057670,cg09249404,cg05377815
chr3	185000755	185000765	185000764	CREB	1-01075	cg00636368,cg22464548,cg01237757,cg10542883,cg05480594,cg07057670,cg09249404	chr3:185000207-185001721	1-05379,1-01075,1-04252,1-06506,1-04299,1-04460	6	cg07633618,cg18949028,cg00636368,cg22464548,cg01237757,cg10542883,cg05480594,cg07057670,cg09249404,cg05377815
chr3	185000755	185000776	185000764	UAK18	1-01075	cg00636368,cg22464548,cg01237757,cg10542883,cg05480594,cg07057670,cg09249404	chr3:185000207-185001721	1-05379,1-01075,1-04252,1-06506,1-04299,1-04460	6	cg07633618,cg18949028,cg00636368,cg22464548,cg01237757,cg10542883,cg05480594,cg07057670,cg09249404,cg05377815
chr3	185000763	185000777	185000764	SP1	1-01075	cg00636368,cg22464548,cg01237757,cg10542883,cg05480594,cg07057670,cg09249404	chr3:185000207-185001721	1-05379,1-01075,1-04252,1-06506,1-04299,1-04460	6	cg07633618,cg18949028,cg00636368,cg22464548,cg01237757,cg10542883,cg05480594,cg07057670,cg09249404,cg05377815
chr3	185000764	185000778	185000764	UAK42	1-01075	cg00636368,cg22464548,cg01237757,cg10542883,cg05480594,cg07057670,cg09249404	chr3:185000207-185001721	1-05379,1-01075,1-04252,1-06506,1-04299,1-04460	6	cg07633618,cg18949028,cg00636368,cg22464548,cg01237757,cg10542883,cg05480594,cg07057670,cg09249404,cg05377815
chr3	196751120	196751134	196751125	UAK42	1-03038	cg22191765,cg12594581,cg14637144	chr3:196750157-196751187	1-02769,1-03038,1-00655,1-06321,1-01049,1-06506,1-04400,1-02413,1-07442,1-05437	10	cg22191765,cg12594581,cg14637144,cg25607670,cg21627187
chr4	125089	125102	125100	MYC	1-00625	cg20320494,cg19819404,cg22831726,cg12717203,cg21149944,cg25397663,cg10197305,cg05388281	chr4:124231-126059	1-00034,1-00041,1-00174,1-00304,1-00667,1-04719,1-04865,1-02769,1-02841,1-02876,1-02917,1-02959,1-03038,1-00625,1-03394,1-03578,1-01075,1-01174,1-03991,1-04164,1-04203,1-04232,1-06506,1-04380,1-04589,1-05476	26	cg20320494,cg19819404,cg22831726,cg12717203,cg21149944,cg25397663,cg15792688,cg10197305,cg05388281,cg14192029
chr4	979090	979111	979102	EGR1	1-00071	cg11017086,cg09359391	chr4:978722-979390	1-00071,1-04865,1-05888,1-02411	4	cg04969220,cg11017086,cg23958868,cg09359391,cg09153458,cg24226891,cg18659028
chr4	979092	979106	979102	SP1	1-00071	cg11017086,cg09359391	chr4:978722-979390	1-00071,1-04865,1-05888,1-02411	4	cg04969220,cg11017086,cg23958868,cg09359391,cg09153458,cg24226891,cg18659028
chr4	979096	979116	979102	UAK42	1-00071	cg11017086,cg09359391	chr4:978722-979390	1-00071,1-04865,1-05888,1-02411	4	cg04969220,cg11017086,cg23958868,cg09359391,cg09153458,cg24226891,cg18659028
chr4	979098	979112	979102	CTCF	1-00071	cg11017086,cg09359391	chr4:978722-979390	1-00071,1-04865,1-05888,1-02411	4	cg04969220,cg11017086,cg23958868,cg09359391,cg09153458,cg24226891,cg18659028
chr4	1350152	1350172	1350162	UAK25	1-02411	cg03587121,cg06157379	chr4:1348577-1349365	1-02411	1	cg03173807,cg00565658,cg11324555,cg05464720,cg03587121
chr4	1350162	1350176	1350162	CTCF	1-02411	cg03587121,cg06157379	chr4:1348577-1349365	1-02411	1	cg03173807,cg00565658,cg11324555,cg05464720,cg03587121
chr4	2813969	2813983	2813978	NR3C1	1-02331	cg03443467,cg10322254,cg05336051,cg25467912,cg12086464,cg15569052	chr4:2813355-2814123	1-02331	1	cg23646330,cg03443467,cg10322254,cg05336051,cg25467912,cg12086464,cg15569052
chr4	2813970	2813980	2813978	UAK35	1-02331	cg03443467,cg10322254,cg05336051,cg25467912,cg12086464,cg15569052	chr4:2813355-2814123	1-02331	1	cg23646330,cg03443467,cg10322254,cg05336051,cg25467912,cg12086464,cg15569052
chr4	2813971	2813981	2813978	ETS1	1-02331	cg03443467,cg10322254,cg05336051,cg25467912,cg12086464,cg15569052	chr4:2813355-2814123	1-02331	1	cg23646330,cg03443467,cg10322254,cg05336051,cg25467912,cg12086464,cg15569052
chr4	2813972	2813982	2813978	ELF1	1-02331	cg03443467,cg10322254,cg05336051,cg25467912,cg12086464,cg15569052	chr4:2813355-2814123	1-02331	1	cg23646330,cg03443467,cg10322254,cg05336051,cg25467912,cg12086464,cg15569052
chr4	2813972	2813982	2813978	GABP	1-02331	cg03443467,cg10322254,cg05336051,cg25467912,cg12086464,cg15569052	chr4:2813355-2814123	1-02331	1	cg23646330,cg03443467,cg10322254,cg05336051,cg25467912,cg12086464,cg15569052
chr4	3878221	3878232	3878231	USF	1-07551	cg03562708,cg17636986,cg16215817	chr4:3877524-3878309	1-07551,1-04588	2	cg07175506,cg21716061,cg03562708,cg17636986,cg16215817
chr4	3878221	3878234	3878231	MAX	1-07551	cg03562708,cg17636986,cg16215817	chr4:3877524-3878309	1-07551,1-04588	2	cg07175506,cg21716061,cg03562708,cg17636986,cg16215817
chr4	4249981	4250001	4249988	UA7	1-04506	cg03719040,cg05910353,cg13296371	chr4:4249982-4250747	1-04870,1-02987,1-06321,1-01049,1-03825,1-01989,1-04506,1-02408	8	cg24322144,cg08436942,cg01918487,cg11923054,cg20118385,cg02538089,cg21786873,cg25984423,cg21164242,cg07587981,cg08741578,cg00817189,cg03719040,cg05910353,cg13296371
chr4	39448755	39448770	39448764	PAX5	1-02264	cg12523932,cg13732582,cg06235390,cg19786733	chr4:39448159-39449131	1-02627,1-02900,1-02544,1-03190,1-03472,1-01238,1-01306,1-02264,1-06506,1-05476	10	cg24403700,cg03423497,cg25940248,cg12523932,cg13732582,cg06235390,cg19786733
chr4	52918225	52918239	52918231	RFX5	1-02264	cg10574494,cg17031543,cg26839512	chr4:52917538-52918490	1-02627,1-02544,1-03190,1-00541,1-05846,1-00894,1-01238,1-02264,1-06506	9	cg04868167,cg26039254,cg06341054,cg10418567,cg09022993,cg01429039,cg05717382,cg10574494,cg17031543,cg26839512
chr4	57410937	57410955	57410948	UAK42	1-00825	cg16579049,cg10299086,cg23861655	chr4:57410775-57411743	1-00825,1-01238,1-06506	3	cg12303341,cg07097005,cg08575268,cg19074255,cg16579049,cg10299086,cg23861655,cg22046143
chr4	57410939	57410953	57410948	E2F1	1-00825	cg16579049,cg10299086,cg23861655	chr4:57410775-57411743	1-00825,1-01238,1-06506	3	cg12303341,cg07097005,cg08575268,cg19074255,cg16579049,cg10299086,cg23861655,cg22046143
chr4	57410941	57410955	57410948	SP1	1-00825	cg16579049,cg10299086,cg23861655	chr4:57410775-57411743	1-00825,1-01238,1-06506	3	cg12303341,cg07097005,cg08575268,cg19074255,cg16579049,cg10299086,cg23861655,cg22046143
chr4	57410942	57410961	57410948	E2F4	1-00825	cg16579049,cg10299086,cg23861655	chr4:57410775-57411743	1-00825,1-01238,1-06506	3	cg12303341,cg07097005,cg08575268,cg19074255,cg16579049,cg10299086,cg23861655,cg22046143
chr4	89618471	89618491	89618479	ZNF263	1-02874	cg05065100,cg01578057,cg11300971,cg19151808,cg01026744,cg13610072,cg07539802,cg05898246	chr4:89618323-89619640	1-04855,1-05093,1-02874,1-03224,1-06204,1-01260,1-02408	7	cg18772071,cg05065100,cg12759554,cg01578057,cg27150681,cg23954636,cg01174175,cg06617468,cg18607468,cg11300971,cg19151808,cg01026744,cg13610072,cg07539802,cg05898246,cg08962841,cg24065722,cg09823893
chr4	185018723	185018730	185018727	RUNX1	1-01174	cg07487572,cg17069313,cg25922112	chr4:185018390-185019117	1-04920,1-03159,1-01174,1-04588	4	cg07487572,cg17069313,cg10203211,cg25922112
chr5	1594673	1594687	1594674	NRF1	1-05009	cg27149073,cg08422420,cg17597639,cg27378537	chr5:1594020-1595580	1-00071,1-00319,1-00389,1-00390,1-00400,1-00739,1-04652,1-04835,1-04870,1-05009,1-05174,1-02769,1-02786,1-02812,1-02917,1-02959,1-02963,1-03038,1-00652,1-03224,1-03393,1-05911,1-06204,1-03578,1-03627,1-01984,1-06506,1-07004,1-07442,1-05597,1-05613,1-02876,1-00808,1-00894,1-01306	35	cg24655777,cg27149073,cg08778598,cg21167402,cg24960960,cg21931717,cg08422420,cg06721546,cg17597639,cg27378537,cg23189951,cg00307584
chr5	8457718	8457732	8457720	UAK42	1-01019	cg26423185,cg04828267,cg05598727,cg18269595,cg07327178,cg24581226,cg23522872	chr5:8457123-8458393	1-00034,1-00423,1-04692,1-04926,1-04975,1-05124,1-02918,1-02544,1-03258,1-03275,1-03374,1-05846,1-06248,1-00808,1-00876,1-00914,1-03627,1-03665,1-01019,1-01049,1-03825,1-01553,1-01869,1-04389,1-02324,1-04523,1-04624,1-05597,1-04719	29	cg04959716,cg26423185,cg04828267,cg05598727,cg18269595,cg18371052,cg07327178,cg18394854,cg24581226,cg17877220,cg23522872
chr5	35925173	35925193	35925178	UAK25	1-02987	cg14469019,cg18511008	chr5:35924617-35925475	1-02987	1	cg09446222,cg15674129,cg14469019,cg18511008
chr5	35925174	35925188	35925178	CTCF-ext	1-02987	cg14469019,cg18511008	chr5:35924617-35925475	1-02987	1	cg09446222,cg15674129,cg14469019,cg18511008
chr5	41870509	41870524	41870520	PAX5	1-00541	cg02389942,cg08637322,cg08590939,cg01060059,cg02441090	chr5:41869372-41870911	1-00071,1-00157,1-00517,1-00541,1-06321,1-00894,1-03627,1-01019,1-04056,1-06506,1-06690,1-04460,1-07593	13	cg03404471,cg20776772,cg02389942,cg08637322,cg08590939,cg01060059,cg20010012,cg11209091,cg11487705,cg21515384,cg18584747,cg04981722,cg20405584,cg23434998
chr5	54455722	54455736	54455736	CTCF	1-07419	cg08212230,cg27647613,cg08508814,cg05824993	chr5:54455176-54456057	1-01238,1-02024,1-02408,1-07419	4	cg15964632,cg08212230,cg27647613,cg08508814,cg05824993,cg19022875,cg24511283,cg05879418,cg14789272
chr5	68628813	68628829	68628819	FOXA	1-05379	cg02580917,cg15003158,cg01291715,cg06405366	chr5:68628239-68629715	1-04870,1-05379,1-05613	3	cg02580917,cg15003158,cg01291715,cg05843340,cg17304295,cg12563533,cg06738298,cg06405366,cg01136335
chr5	110062359	110062374	110062373	UAK45	1-04333	cg19398821,cg06414816	chr5:110062342-110062838	1-00034,1-00041,1-00304,1-00344,1-00389,1-00390,1-00423,1-04655,1-05379,1-02786,1-02874,1-02926,1-02544,1-00655,1-05888,1-05911,1-05999,1-06204,1-00832,1-00871,1-00874,1-03578,1-03652,1-03825,1-03991,1-04056,1-04095,1-01384,1-01553,1-01869,1-02283,1-04190,1-06537,1-06690,1-04333,1-02491,1-04523,1-05420,1-05443,1-05635	40	cg23279021,cg17248924,cg11641395,cg06429214,cg20963261,cg22429640,cg19398821,cg27037608,cg17946588,cg10597099,cg19526166,cg26583412,cg06414816
chr5	118323833	118323840	118323840	UAK49	1-05977	cg03350457,cg27331495,cg02558611	chr5:118323859-118324628	1-00770,1-04782,1-04921,1-03038,1-00652,1-05977,1-06498,1-03394,1-03652,1-01989,1-06506,1-04299	12	cg08452546,cg08755283,cg03241287,cg19976771,cg03350457,cg27331495,cg02558611
chr5	121465147	121465161	121465159	RFX5	1-04855	cg20155367	chr5:121464240-121465224	1-00112,1-04855,1-05443	3	cg23376467,cg05008688,cg18554917,cg20155367,cg19083497,cg22282672
chr5	121465185	121465199	121465194	RFX5	1-05443	cg20155367	chr5:121464240-121465224	1-00112,1-04855,1-05443	3	cg23376467,cg05008688,cg18554917,cg20155367,cg19083497,cg22282672
chr5	135416381	135416398	135416388	CREB-ext	1-00389	cg25340688,cg18797653	chr5:135414857-135416614	1-00197,1-00249,1-00319,1-00389,1-04920,1-02917,1-02918,1-03191,1-00655,1-03275,1-03298,1-05888,1-05977,1-06204,1-03894,1-03972,1-04113,1-01984,1-02183,1-06988,1-04460,1-04472,1-08788,1-04540,1-05570,1-00157,1-00312,1-00667,1-02627,1-02769,1-00808,1-01869,1-00423,1-05360,1-07033,1-00304,1-00797,1-04870,1-04901,1-04975,1-02926,1-04631,1-03258,1-00874,1-03437,1-00913,1-01017,1-03846,1-01238,1-01444…	55	cg11852404,cg16684184,cg00308130,cg15837280,cg07158503,cg04515200,cg13581155,cg11608150,cg06478886,cg04481923,cg18678645,cg06536614,cg25340688,cg26896946,cg00124993,cg08745965,cg18797653
chr5	138533400	138533421	138533400	EGR1	1-04893	cg24688549,cg05237436,cg19527159	chr5:138533414-138534358	1-04782,1-04893,1-03374,1-05675,1-00808,1-06506,1-07026,1-04466	8	cg24688549,cg05237436,cg19527159,cg25496162,cg12206225,cg16698583,cg00849347,cg01614792,cg13906121,cg13119976
chr5	138609722	138609736	138609735	SP1	1-02491	cg18771857,cg22160883	chr5:138608506-138609386	1-04893,1-04920,1-04466,1-02491	4	cg03926215,cg25391820,cg18771857,cg22160883,cg10885414,cg05129470,cg23167218
chr5	138609726	138609740	138609735	UAK42	1-02491	cg18771857,cg22160883	chr5:138608506-138609386	1-04893,1-04920,1-04466,1-02491	4	cg03926215,cg25391820,cg18771857,cg22160883,cg10885414,cg05129470,cg23167218
chr5	141017776	141017790	141017779	CTCF	1-03665	cg11153694,cg10414058	chr5:141016959-141018370	1-03665	1	cg20642138,cg19549288,cg17940889,cg12082871,cg24385322,cg11153694,cg10414058,cg02047803
chr5	149535522	149535536	149535523	UAK42	1-00071	cg03121287,cg25110734,cg12727795	chr5:149535386-149535952	1-00071	1	cg03121287,cg25110734,cg12727795,cg20348829
chr5	153418544	153418554	153418549	UAK35	1-02024	cg26994023,cg19774031,cg04913132	chr5:153418201-153418978	1-02024	1	cg22230395,cg01809845,cg01590693,cg00558737,cg26062048,cg20435608,cg09871980,cg00967121,cg26962342,cg09077340,cg13950403,cg06508582,cg12879339,cg10985086,cg17034082,cg00244006,cg26994023,cg19774031,cg04913132
chr5	153418546	153418556	153418549	ELF1	1-02024	cg26994023,cg19774031,cg04913132	chr5:153418201-153418978	1-02024	1	cg22230395,cg01809845,cg01590693,cg00558737,cg26062048,cg20435608,cg09871980,cg00967121,cg26962342,cg09077340,cg13950403,cg06508582,cg12879339,cg10985086,cg17034082,cg00244006,cg26994023,cg19774031,cg04913132
chr5	153418546	153418556	153418549	ELK4	1-02024	cg26994023,cg19774031,cg04913132	chr5:153418201-153418978	1-02024	1	cg22230395,cg01809845,cg01590693,cg00558737,cg26062048,cg20435608,cg09871980,cg00967121,cg26962342,cg09077340,cg13950403,cg06508582,cg12879339,cg10985086,cg17034082,cg00244006,cg26994023,cg19774031,cg04913132
chr5	153418546	153418556	153418549	GABP	1-02024	cg26994023,cg19774031,cg04913132	chr5:153418201-153418978	1-02024	1	cg22230395,cg01809845,cg01590693,cg00558737,cg26062048,cg20435608,cg09871980,cg00967121,cg26962342,cg09077340,cg13950403,cg06508582,cg12879339,cg10985086,cg17034082,cg00244006,cg26994023,cg19774031,cg04913132
chr5	153418547	153418554	153418549	ELF	1-02024	cg26994023,cg19774031,cg04913132	chr5:153418201-153418978	1-02024	1	cg22230395,cg01809845,cg01590693,cg00558737,cg26062048,cg20435608,cg09871980,cg00967121,cg26962342,cg09077340,cg13950403,cg06508582,cg12879339,cg10985086,cg17034082,cg00244006,cg26994023,cg19774031,cg04913132
chr5	157002911	157002925	157002925	UA3	1-01049	cg09079275,cg25559421,cg25387487	chr5:157001560-157003437	1-06506,1-01049	2	cg13667243,cg15598120,cg07301795,cg13926279,cg17200589,cg07540118,cg14607812,cg23851860,cg02725069,cg18384890,cg09079275,cg25559421,cg25387487,cg08604960
chr5	157002917	157002931	157002925	UAK42	1-01049	cg09079275,cg25559421,cg25387487	chr5:157001560-157003437	1-06506,1-01049	2	cg13667243,cg15598120,cg07301795,cg13926279,cg17200589,cg07540118,cg14607812,cg23851860,cg02725069,cg18384890,cg09079275,cg25559421,cg25387487,cg08604960
chr5	170289075	170289089	170289076	NRF1	1-00319	cg22375518,cg08358803,cg01579024	chr5:170288254-170289639	1-00319,1-00389,1-04693,1-05009,1-02627,1-02900,1-02918,1-02544,1-02959,1-00541,1-05675,1-05888,1-06321,1-00874,1-03394,1-03437,1-01238,1-01306,1-02290,1-04190,1-04472,1-02331,1-04540,1-05635	24	cg05742691,cg07570641,cg17955564,cg22792350,cg22375518,cg08358803,cg01579024,cg02091185,cg00871487,cg23128634,cg20780811,cg23873669,cg07848601,cg00579717
chr5	176981681	176981695	176981693	ZNF143	1-00625	cg19658046,cg12152566,cg17393458,cg15118750	chr5:176980908-176982440	1-02627,1-04782,1-04865,1-00625,1-06506	5	cg02619412,cg04825775,cg06696549,cg12345696,cg13906733,cg01194329,cg26454316,cg19658046,cg12152566,cg17393458,cg18478850,cg02267992,cg01634213,cg15118750
chr5	178054306	178054325	178054311	E2F4	1-00304	cg22778145,cg20260921,cg07256713	chr5:178054016-178054696	1-00304	1	cg05253018,cg12766348,cg27492527,cg10600010,cg11220437,cg23378609,cg22778145,cg20260921,cg07256713
chr5	178054456	178054475	178054459	E2F4	1-00304	cg22778145,cg20260921,cg07256713	chr5:178054016-178054696	1-00304	1	cg05253018,cg12766348,cg27492527,cg10600010,cg11220437,cg23378609,cg22778145,cg20260921,cg07256713
chr5	178986765	178986779	178986776	ZNF143	1-04380	cg02136620,cg22764044,cg26516362,cg06868132	chr5:178986130-178987430	1-00046,1-00071,1-00150,1-00400,1-00423,1-00667,1-00801,1-04855,1-04865,1-04870,1-04926,1-05009,1-05093,1-02874,1-02917,1-03038,1-03059,1-00655,1-03374,1-05926,1-06498,1-00825,1-03394,1-03665,1-01049,1-03825,1-04071,1-04112,1-01242,1-01444,1-02097,1-02241,1-04232,1-06988,1-04270,1-04367,1-04376,1-04380,1-04472,1-07419,1-04589,1-05570,1-05597	43	cg19626725,cg00080972,cg25658438,cg21226059,cg14820908,cg06118287,cg02136620,cg01955137,cg08058472,cg20199595,cg09060608,cg05457628,cg22764044,cg26516362,cg06868132
chr5	180645280	180645295	180645290	B-Box	1-02786	cg00796793,cg03765314,cg00277263,cg12267016,cg17519206	chr5:180643431-180645337	1-00034,1-00312,1-00347,1-04782,1-05009,1-05926,1-00871,1-01049,1-01238,1-06506,1-01045,1-02786	12	cg01203153,cg17432513,cg24019599,cg16458123,cg15025560,cg20701977,cg00796793,cg03765314,cg00277263,cg04693014,cg12267016,cg17519206
chr6	292060	292074	292074	NRF1	1-04190	cg11235426,cg26668828	chr6:291686-293286	1-00046,1-00174,1-00347,1-00667,1-00761,1-00797,1-04774,1-04870,1-05153,1-02793,1-02544,1-02987,1-03038,1-03190,1-05926,1-05946,1-00874,1-00914,1-00982,1-03627,1-03639,1-01218,1-03825,1-03840,1-02024,1-02241,1-04164,1-06506,1-04367,1-04465,1-02324,1-04537,1-02841,1-05846,1-06690,1-05635,1-04835,1-04190	38	cg07332563,cg17876578,cg21548813,cg03395511,cg18110333,cg05064044,cg11235426,cg01516881,cg26668828,cg01171360
chr6	292160	292179	292179	E2F4	1-02841	cg01516881,cg26668828	chr6:291686-293286	1-00046,1-00174,1-00347,1-00667,1-00761,1-00797,1-04774,1-04870,1-05153,1-02793,1-02544,1-02987,1-03038,1-03190,1-05926,1-05946,1-00874,1-00914,1-00982,1-03627,1-03639,1-01218,1-03825,1-03840,1-02024,1-02241,1-04164,1-06506,1-04367,1-04465,1-02324,1-04537,1-02841,1-05846,1-06690,1-05635,1-04835,1-04190	38	cg07332563,cg17876578,cg21548813,cg03395511,cg18110333,cg05064044,cg11235426,cg01516881,cg26668828,cg01171360
chr6	17988223	17988237	17988226	NRF1	1-07593	cg05463027,cg20211816,cg08248579,cg03089870	chr6:17988403-17988961	1-04782,1-04893,1-04920,1-02917,1-03298,1-01174,1-06506,1-04466,1-07593,1-05443,1-05613	11	cg23792258,cg19274676,cg10716309,cg21725624,cg05463027,cg20211816,cg08248579,cg03089870
chr6	28565127	28565142	28565129	B-Box	1-02411	cg24388424,cg04785732,cg15747825	chr6:28565402-28565627	1-00389,1-00739,1-00652,1-06401,1-02264,1-02411,1-04588	7	cg24388424,cg04785732,cg15747825
chr6	28891699	28891722	28891711	E2F1	1-00652	cg02389555	chr6:28889681-28892080	1-00652,1-00157,1-01805,1-01989,1-02024,1-02411,1-02425,1-02491,1-08788	9	cg18954047,cg22355525,cg12896170,cg13060704,cg01794889,cg21160062,cg16723189,cg11524778,cg07300976,cg05668405,cg19484381,cg24990422,cg02389555,cg16520539,cg05670865,cg15766595,cg25922680,cg11362785,cg02593352,cg03671443,cg09325158,cg08356572,cg19494464,cg13646645,cg03647327,cg21568286,cg25589651,cg03270340,cg06600118,cg13110966,cg10905031,cg09805314,cg00875200,cg11629443,cg14322215,cg19519384,cg2…
chr6	28891702	28891721	28891711	E2F4	1-00652	cg02389555	chr6:28889681-28892080	1-00652,1-00157,1-01805,1-01989,1-02024,1-02411,1-02425,1-02491,1-08788	9	cg18954047,cg22355525,cg12896170,cg13060704,cg01794889,cg21160062,cg16723189,cg11524778,cg07300976,cg05668405,cg19484381,cg24990422,cg02389555,cg16520539,cg05670865,cg15766595,cg25922680,cg11362785,cg02593352,cg03671443,cg09325158,cg08356572,cg19494464,cg13646645,cg03647327,cg21568286,cg25589651,cg03270340,cg06600118,cg13110966,cg10905031,cg09805314,cg00875200,cg11629443,cg14322215,cg19519384,cg2…
chr6	28950022	28950037	28950035	B-Box	1-00543	cg06120475,cg15157214,cg02228046	chr6:28950331-28950634	1-02917,1-00543,1-03825,1-01384,1-07593	5	cg06120475,cg15157214,cg02228046
chr6	28984933	28984947	28984944	PU1	1-02959	cg14132236	chr6:28983078-28985070	1-04693,1-02627,1-02917,1-02918,1-02959,1-00543,1-03374,1-06321,1-00832,1-00914,1-02097,1-06506,1-07004,1-05613,1-04870,1-02544,1-06204,1-04112,1-04270,1-02411,1-02413,1-07419,1-07555,1-04624,1-09064,1-05635,1-03038	27	cg16568131,cg10933494,cg20373401,cg03656877,cg00219626,cg09012858,cg02675264,cg14132236,cg22834713,cg26712477,cg00719211,cg02665416,cg24900671,cg23506204,cg01953087,cg10111314,cg12909932,cg19174706,cg10293093,cg24594177,cg17019630,cg17255947,cg01885291,cg24953636,cg01134061,cg20993222,cg24295104
chr6	29600961	29600981	29600975	REST	1-03422	cg03316098,cg10234998,cg21481950	chr6:29597990-29602035	1-00423,1-00508,1-00806,1-04921,1-04926,1-04975,1-05009,1-03374,1-05977,1-05999,1-00818,1-03991,1-04071,1-04112,1-01256,1-01444,1-01869,1-02260,1-06506,1-06537,1-06988,1-02408,1-02425,1-07278,1-05597,1-06690,1-00174,1-05673,1-03422,1-03897,1-04460,1-05443	32	cg12292060,cg14841796,cg08415141,cg09842161,cg20757073,cg24936467,cg21645752,cg23306453,cg01765653,cg06519422,cg21644740,cg03127104,cg12991385,cg17806418,cg22679406,cg06512249,cg07839627,cg01453816,cg11209538,cg25774457,cg09749751,cg27217194,cg25804470,cg05661333,cg05434863,cg14128584,cg19456996,cg24847163,cg17851017,cg03316098,cg10234998,cg21481950,cg19022254,cg04324598
chr6	29600973	29600987	29600975	YY1	1-03422	cg03316098,cg10234998,cg21481950	chr6:29597990-29602035	1-00423,1-00508,1-00806,1-04921,1-04926,1-04975,1-05009,1-03374,1-05977,1-05999,1-00818,1-03991,1-04071,1-04112,1-01256,1-01444,1-01869,1-02260,1-06506,1-06537,1-06988,1-02408,1-02425,1-07278,1-05597,1-06690,1-00174,1-05673,1-03422,1-03897,1-04460,1-05443	32	cg12292060,cg14841796,cg08415141,cg09842161,cg20757073,cg24936467,cg21645752,cg23306453,cg01765653,cg06519422,cg21644740,cg03127104,cg12991385,cg17806418,cg22679406,cg06512249,cg07839627,cg01453816,cg11209538,cg25774457,cg09749751,cg27217194,cg25804470,cg05661333,cg05434863,cg14128584,cg19456996,cg24847163,cg17851017,cg03316098,cg10234998,cg21481950,cg19022254,cg04324598
chr6	29794239	29794257	29794252	AP1	1-05420	cg14574237,cg08708750	chr6:29794502-29797329	1-00041,1-00423,1-00508,1-00806,1-04655,1-04926,1-05360,1-02959,1-03275,1-00874,1-03538,1-00914,1-03897,1-04056,1-01984,1-06537,1-04460,1-02413,1-02491,1-05420,1-05613,1-00390,1-04870,1-04893,1-00543,1-00655,1-05675,1-00808,1-00982,1-05437,1-05911,1-06506,1-01577,1-00157,1-00517,1-05007,1-03652,1-04367,1-04512,1-00080,1-02627,1-06690,1-04523	43	cg14941654,cg19050514,cg26302178,cg17184855,cg09430946,cg17213462,cg10556772,cg03096746,cg03432955,cg09865095,cg00126638,cg03521696,cg18914211,cg21529533,cg12287358,cg03997176,cg19141489,cg22257941,cg06612259,cg11363230,cg15174396,cg14914254,cg03149560,cg06212945,cg18031134,cg14546076,cg07000290,cg00584549,cg18114946,cg13130352,cg26511972,cg12358432,cg23110482,cg19729479,cg15224505
chr6	29795980	29795994	29795987	CTCF	1-04460	cg17184855,cg17213462,cg03432955	chr6:29794502-29797329	1-00041,1-00423,1-00508,1-00806,1-04655,1-04926,1-05360,1-02959,1-03275,1-00874,1-03538,1-00914,1-03897,1-04056,1-01984,1-06537,1-04460,1-02413,1-02491,1-05420,1-05613,1-00390,1-04870,1-04893,1-00543,1-00655,1-05675,1-00808,1-00982,1-05437,1-05911,1-06506,1-01577,1-00157,1-00517,1-05007,1-03652,1-04367,1-04512,1-00080,1-02627,1-06690,1-04523	43	cg14941654,cg19050514,cg26302178,cg17184855,cg09430946,cg17213462,cg10556772,cg03096746,cg03432955,cg09865095,cg00126638,cg03521696,cg18914211,cg21529533,cg12287358,cg03997176,cg19141489,cg22257941,cg06612259,cg11363230,cg15174396,cg14914254,cg03149560,cg06212945,cg18031134,cg14546076,cg07000290,cg00584549,cg18114946,cg13130352,cg26511972,cg12358432,cg23110482,cg19729479,cg15224505
chr6	29815990	29816004	29815992	CTCF	1-01989	cg24955682,cg11989485,cg25701100	chr6:29815804-29816167	1-01989	1	cg24955682,cg11989485,cg25701100,cg05050652
chr6	29815991	29816001	29815992	TCF12	1-01989	cg24955682,cg11989485,cg25701100	chr6:29815804-29816167	1-01989	1	cg24955682,cg11989485,cg25701100,cg05050652
chr6	29815992	29816012	29815992	UAK25	1-01989	cg24955682,cg11989485,cg25701100	chr6:29815804-29816167	1-01989	1	cg24955682,cg11989485,cg25701100,cg05050652
chr6	30068840	30068854	30068852	CTCF	1-11800	cg21671020,cg23344452,cg04163475,cg22442895,cg03553308,cg17961892,cg09119433	chr6:30068492-30072469	1-11800,1-01238,1-06506,1-00543,1-00625,1-03846,1-04056,1-04071,1-02024,1-04465	10	cg21671020,cg23344452,cg09984759,cg13085414,cg25793630,cg06053738,cg27041554,cg02301724,cg23161794,cg04163475,cg22442895,cg03553308,cg17961892,cg09119433,cg09791883,cg04906656,cg20938781,cg21836627,cg27475174,cg22121388,cg27618684,cg26418137,cg18504015,cg18580274,cg15384453,cg14747086,cg19178742,cg26256630,cg14273401,cg19712586,cg12152443,cg18502917,cg27350716,cg15093247,cg18684207,cg00799826,cg1…
chr6	30654919	30654933	30654929	ZNF263	1-01984	cg13357602,cg02429813,cg21049361,cg14571710	chr6:30652687-30656025	1-00080,1-00801,1-04774,1-02918,1-02963,1-05675,1-06204,1-01049,1-01238,1-02234,1-04270,1-04389,1-04512,1-06506,1-05597,1-04920,1-03298,1-01984	18	cg01413582,cg11414821,cg12036303,cg00010853,cg08253704,cg12105190,cg25980484,cg03052182,cg12247101,cg18335326,cg10098021,cg12197421,cg06644669,cg10692290,cg19504658,cg22412072,cg25025773,cg25807071,cg01568521,cg03038057,cg23197007,cg21369949,cg13357602,cg02429813,cg21049361,cg14571710,cg27385757
chr6	30881972	30881992	30881990	UAK25	1-04071	cg16958594	chr6:30879514-30885710	1-04465,1-00071,1-00150,1-00312,1-04655,1-11800,1-03059,1-03159,1-00652,1-03298,1-06370,1-00808,1-03394,1-03422,1-00894,1-03652,1-03842,1-01238,1-01384,1-06506,1-02413,1-07593,1-05597,1-00034,1-00761,1-04926,1-04975,1-02900,1-02963,1-03840,1-04139,1-04252,1-04367,1-04466,1-04782,1-04893,1-02793,1-02987,1-05911,1-01984,1-05443,1-05093,1-03538,1-04071,1-07278,1-03374,1-07442	47	cg11350728,cg09761550,cg07945879,cg27122065,cg19132733,cg24697238,cg22508626,cg00929964,cg07713538,cg26134320,cg19725862,cg13472000,cg26935722,cg23387168,cg08617970,cg21783599,cg02306936,cg12433575,cg10661769,cg09424348,cg15080939,cg05267955,cg18261909,cg27650171,cg16555181,cg02186769,cg26860970,cg05103231,cg00649377,cg24517380,cg16914989,cg09723781,cg27550606,cg18411800,cg06693277,cg11571001,cg1…
chr6	30881984	30881991	30881990	UAK52	1-04071	cg16958594	chr6:30879514-30885710	1-04465,1-00071,1-00150,1-00312,1-04655,1-11800,1-03059,1-03159,1-00652,1-03298,1-06370,1-00808,1-03394,1-03422,1-00894,1-03652,1-03842,1-01238,1-01384,1-06506,1-02413,1-07593,1-05597,1-00034,1-00761,1-04926,1-04975,1-02900,1-02963,1-03840,1-04139,1-04252,1-04367,1-04466,1-04782,1-04893,1-02793,1-02987,1-05911,1-01984,1-05443,1-05093,1-03538,1-04071,1-07278,1-03374,1-07442	47	cg11350728,cg09761550,cg07945879,cg27122065,cg19132733,cg24697238,cg22508626,cg00929964,cg07713538,cg26134320,cg19725862,cg13472000,cg26935722,cg23387168,cg08617970,cg21783599,cg02306936,cg12433575,cg10661769,cg09424348,cg15080939,cg05267955,cg18261909,cg27650171,cg16555181,cg02186769,cg26860970,cg05103231,cg00649377,cg24517380,cg16914989,cg09723781,cg27550606,cg18411800,cg06693277,cg11571001,cg1…
chr6	30881988	30882002	30881990	NRF1	1-04071	cg16958594	chr6:30879514-30885710	1-04465,1-00071,1-00150,1-00312,1-04655,1-11800,1-03059,1-03159,1-00652,1-03298,1-06370,1-00808,1-03394,1-03422,1-00894,1-03652,1-03842,1-01238,1-01384,1-06506,1-02413,1-07593,1-05597,1-00034,1-00761,1-04926,1-04975,1-02900,1-02963,1-03840,1-04139,1-04252,1-04367,1-04466,1-04782,1-04893,1-02793,1-02987,1-05911,1-01984,1-05443,1-05093,1-03538,1-04071,1-07278,1-03374,1-07442	47	cg11350728,cg09761550,cg07945879,cg27122065,cg19132733,cg24697238,cg22508626,cg00929964,cg07713538,cg26134320,cg19725862,cg13472000,cg26935722,cg23387168,cg08617970,cg21783599,cg02306936,cg12433575,cg10661769,cg09424348,cg15080939,cg05267955,cg18261909,cg27650171,cg16555181,cg02186769,cg26860970,cg05103231,cg00649377,cg24517380,cg16914989,cg09723781,cg27550606,cg18411800,cg06693277,cg11571001,cg1…
chr6	31148545	31148559	31148553	SP1	1-06690	cg11805138,cg17931227,cg09179646,cg22291762,cg24427850,cg26668675,cg03078486,cg22701603,cg23252259,cg14036627,cg11811828	chr6:31148331-31148749	1-00034,1-00071,1-00304,1-00347,1-00389,1-00801,1-04693,1-02652,1-02874,1-02544,1-02963,1-05673,1-05675,1-05726,1-05946,1-05977,1-00871,1-00876,1-00894,1-03676,1-03825,1-01238,1-01577,1-02283,1-06506,1-06690,1-04460,1-04466,1-02331,1-07084,1-09064,1-05635	32	cg11805138,cg17931227,cg09179646,cg22291762,cg24427850,cg26668675,cg03078486,cg22701603,cg26818629,cg27547543,cg09357589,cg01982166,cg23252259,cg14036627,cg11811828,cg23457357
chr6	31148548	31148560	31148553	UA2	1-06690	cg11805138,cg17931227,cg09179646,cg22291762,cg24427850,cg26668675,cg03078486,cg22701603,cg23252259,cg14036627,cg11811828	chr6:31148331-31148749	1-00034,1-00071,1-00304,1-00347,1-00389,1-00801,1-04693,1-02652,1-02874,1-02544,1-02963,1-05673,1-05675,1-05726,1-05946,1-05977,1-00871,1-00876,1-00894,1-03676,1-03825,1-01238,1-01577,1-02283,1-06506,1-06690,1-04460,1-04466,1-02331,1-07084,1-09064,1-05635	32	cg11805138,cg17931227,cg09179646,cg22291762,cg24427850,cg26668675,cg03078486,cg22701603,cg26818629,cg27547543,cg09357589,cg01982166,cg23252259,cg14036627,cg11811828,cg23457357
chr6	31164799	31164813	31164808	ZNF263	1-05420	cg09622121,cg18598029,cg03030317,cg12771717	chr6:31164175-31167428	1-00197,1-00400,1-00739,1-04719,1-04926,1-05093,1-02876,1-03059,1-03159,1-01238,1-01984,1-02241,1-06506,1-04588,1-05420,1-05846,1-02900	17	cg05699123,cg18923388,cg18969004,cg08085597,cg07630345,cg23595396,cg09622121,cg18598029,cg03030317,cg12771717,cg24023453,cg05346947,cg04710276,cg17553885,cg10061945,cg17917683,cg11524593,cg03462677,cg17287630,cg08588744,cg13375758,cg14695524,cg06819687,cg05891181,cg17964422,cg12555879,cg07199801,cg18918396,cg23762487,cg09555555,cg05966988,cg18384990,cg27032957,cg21237268,cg10773928,cg13806964,cg0…
chr6	31164961	31164975	31164969	UAK42	1-05420	cg09622121,cg18598029,cg03030317,cg12771717	chr6:31164175-31167428	1-00197,1-00400,1-00739,1-04719,1-04926,1-05093,1-02876,1-03059,1-03159,1-01238,1-01984,1-02241,1-06506,1-04588,1-05420,1-05846,1-02900	17	cg05699123,cg18923388,cg18969004,cg08085597,cg07630345,cg23595396,cg09622121,cg18598029,cg03030317,cg12771717,cg24023453,cg05346947,cg04710276,cg17553885,cg10061945,cg17917683,cg11524593,cg03462677,cg17287630,cg08588744,cg13375758,cg14695524,cg06819687,cg05891181,cg17964422,cg12555879,cg07199801,cg18918396,cg23762487,cg09555555,cg05966988,cg18384990,cg27032957,cg21237268,cg10773928,cg13806964,cg0…
chr6	31239651	31239665	31239660	ZNF263	1-00436	cg10409680	chr6:31237033-31241295	1-00034,1-00046,1-00112,1-00150,1-00157,1-00801,1-00806,1-00543,1-02411,1-04589,1-00436,1-02926,1-03393,1-03538,1-01049,1-01218,1-04112,1-04389,1-05597,1-00702,1-04719,1-04782,1-05613,1-03038,1-03298,1-05888,1-01019,1-00319,1-05174,1-04975,1-02627,1-05675,1-00874,1-01306,1-05420,1-01984,1-02234	37	cg11574174,cg24710520,cg11247343,cg25149637,cg13872627,cg01064373,cg18511546,cg26392102,cg17096289,cg15634083,cg12291348,cg15397231,cg12965927,cg18919024,cg26128383,cg16181043,cg18020334,cg24877963,cg10409680,cg17974398,cg05619024,cg01006124,cg27358585,cg07505391,cg08309069,cg00620824,cg05030953,cg05338672
chr6	31651082	31651096	31651095	CTCF	1-04389	cg07455790,cg05857999,cg02389040,cg00022997,cg18576957,cg08624648,cg04386400	chr6:31646060-31651677	1-06506,1-04465,1-03374,1-05570,1-04893,1-03001,1-01049,1-04466,1-00071,1-00304,1-05093,1-00652,1-01174,1-06988,1-04299,1-04400,1-07551,1-00034,1-00150,1-00174,1-00249,1-00347,1-04774,1-04782,1-04911,1-05153,1-03059,1-00543,1-05846,1-05911,1-01017,1-03627,1-01075,1-01190,1-02264,1-04380,1-04389,1-07084,1-07278,1-07386,1-07555,1-05443,1-05476,1-05635,1-00197,1-00801,1-02812,1-02900,1-00625,1-00645…	59	cg03337084,cg24768187,cg00621943,cg15039036,cg17187990,cg12632549,cg07537699,cg11452501,cg23894755,cg20543183,cg02615735,cg13892322,cg20717622,cg00271925,cg08623051,cg08226747,cg18581937,cg19387310,cg25188387,cg07845406,cg17990278,cg03588325,cg23642766,cg06667222,cg14102811,cg14463529,cg07151644,cg09295695,cg22404450,cg08759960,cg08049061,cg09832267,cg02683578,cg00965469,cg08412885,cg22786465,cg0…
chr6	32121342	32121356	32121349	UA3	1-04774	cg17113856,cg20328456,cg12738718,cg14130039,cg05133205,cg17329164,cg18049167,cg04105091,cg12585943,cg00552704,cg06264679,cg00933538,cg27134827	chr6:32115210-32123702	1-04774,1-04865,1-02918,1-02959,1-01306,1-04270,1-00347,1-03538,1-07593,1-06506,1-02413,1-05009,1-02544,1-06204,1-02408,1-04512,1-05420,1-00034,1-04655,1-03639,1-04460,1-07278,1-02234,1-04389,1-00041,1-00150,1-00174,1-00319,1-00517,1-04782,1-04926,1-04975,1-03190,1-05675,1-05977,1-00808,1-03472,1-01019,1-01053,1-01174,1-01553,1-07026,1-04506,1-00423,1-00914,1-03991,1-04112,1-00806,1-00543,1-00625…	81	cg22755579,cg07885132,cg18419271,cg09782912,cg03812323,cg08505243,cg23061027,cg26849331,cg07241479,cg14027333,cg25955180,cg14644001,cg21570988,cg27067781,cg14757228,cg13782301,cg19192280,cg02925367,cg17626960,cg14531663,cg11945824,cg04630292,cg24125828,cg22897615,cg17955729,cg05767720,cg08424749,cg18501647,cg11515873,cg14732337,cg14849065,cg12320039,cg15194163,cg05714552,cg05764839,cg08123207,cg1…
chr6	32121762	32121772	32121770	ETS1	1-03001	cg06025456,cg13934406,cg17113856,cg06108383,cg02956248,cg23359665,cg16481280,cg14130039	chr6:32115210-32123702	1-04774,1-04865,1-02918,1-02959,1-01306,1-04270,1-00347,1-03538,1-07593,1-06506,1-02413,1-05009,1-02544,1-06204,1-02408,1-04512,1-05420,1-00034,1-04655,1-03639,1-04460,1-07278,1-02234,1-04389,1-00041,1-00150,1-00174,1-00319,1-00517,1-04782,1-04926,1-04975,1-03190,1-05675,1-05977,1-00808,1-03472,1-01019,1-01053,1-01174,1-01553,1-07026,1-04506,1-00423,1-00914,1-03991,1-04112,1-00806,1-00543,1-00625…	81	cg22755579,cg07885132,cg18419271,cg09782912,cg03812323,cg08505243,cg23061027,cg26849331,cg07241479,cg14027333,cg25955180,cg14644001,cg21570988,cg27067781,cg14757228,cg13782301,cg19192280,cg02925367,cg17626960,cg14531663,cg11945824,cg04630292,cg24125828,cg22897615,cg17955729,cg05767720,cg08424749,cg18501647,cg11515873,cg14732337,cg14849065,cg12320039,cg15194163,cg05714552,cg05764839,cg08123207,cg1…
chr6	32121763	32121773	32121770	UAK35	1-03001	cg06025456,cg13934406,cg17113856,cg06108383,cg02956248,cg23359665,cg16481280,cg14130039	chr6:32115210-32123702	1-04774,1-04865,1-02918,1-02959,1-01306,1-04270,1-00347,1-03538,1-07593,1-06506,1-02413,1-05009,1-02544,1-06204,1-02408,1-04512,1-05420,1-00034,1-04655,1-03639,1-04460,1-07278,1-02234,1-04389,1-00041,1-00150,1-00174,1-00319,1-00517,1-04782,1-04926,1-04975,1-03190,1-05675,1-05977,1-00808,1-03472,1-01019,1-01053,1-01174,1-01553,1-07026,1-04506,1-00423,1-00914,1-03991,1-04112,1-00806,1-00543,1-00625…	81	cg22755579,cg07885132,cg18419271,cg09782912,cg03812323,cg08505243,cg23061027,cg26849331,cg07241479,cg14027333,cg25955180,cg14644001,cg21570988,cg27067781,cg14757228,cg13782301,cg19192280,cg02925367,cg17626960,cg14531663,cg11945824,cg04630292,cg24125828,cg22897615,cg17955729,cg05767720,cg08424749,cg18501647,cg11515873,cg14732337,cg14849065,cg12320039,cg15194163,cg05714552,cg05764839,cg08123207,cg1…
chr6	32121853	32121874	32121861	UAK18	1-03538	cg13934406,cg10551329,cg16481280,cg01111041,cg20328456,cg00110832,cg11386011,cg14130039,cg05133205,cg04105091,cg12585943,cg00552704,cg06264679	chr6:32115210-32123702	1-04774,1-04865,1-02918,1-02959,1-01306,1-04270,1-00347,1-03538,1-07593,1-06506,1-02413,1-05009,1-02544,1-06204,1-02408,1-04512,1-05420,1-00034,1-04655,1-03639,1-04460,1-07278,1-02234,1-04389,1-00041,1-00150,1-00174,1-00319,1-00517,1-04782,1-04926,1-04975,1-03190,1-05675,1-05977,1-00808,1-03472,1-01019,1-01053,1-01174,1-01553,1-07026,1-04506,1-00423,1-00914,1-03991,1-04112,1-00806,1-00543,1-00625…	81	cg22755579,cg07885132,cg18419271,cg09782912,cg03812323,cg08505243,cg23061027,cg26849331,cg07241479,cg14027333,cg25955180,cg14644001,cg21570988,cg27067781,cg14757228,cg13782301,cg19192280,cg02925367,cg17626960,cg14531663,cg11945824,cg04630292,cg24125828,cg22897615,cg17955729,cg05767720,cg08424749,cg18501647,cg11515873,cg14732337,cg14849065,cg12320039,cg15194163,cg05714552,cg05764839,cg08123207,cg1…
chr6	32121853	32121874	32121861	UAK18	1-03639	cg03995156	chr6:32115210-32123702	1-04774,1-04865,1-02918,1-02959,1-01306,1-04270,1-00347,1-03538,1-07593,1-06506,1-02413,1-05009,1-02544,1-06204,1-02408,1-04512,1-05420,1-00034,1-04655,1-03639,1-04460,1-07278,1-02234,1-04389,1-00041,1-00150,1-00174,1-00319,1-00517,1-04782,1-04926,1-04975,1-03190,1-05675,1-05977,1-00808,1-03472,1-01019,1-01053,1-01174,1-01553,1-07026,1-04506,1-00423,1-00914,1-03991,1-04112,1-00806,1-00543,1-00625…	81	cg22755579,cg07885132,cg18419271,cg09782912,cg03812323,cg08505243,cg23061027,cg26849331,cg07241479,cg14027333,cg25955180,cg14644001,cg21570988,cg27067781,cg14757228,cg13782301,cg19192280,cg02925367,cg17626960,cg14531663,cg11945824,cg04630292,cg24125828,cg22897615,cg17955729,cg05767720,cg08424749,cg18501647,cg11515873,cg14732337,cg14849065,cg12320039,cg15194163,cg05714552,cg05764839,cg08123207,cg1…
chr6	32154971	32154985	32154973	PU1	1-00667	cg00963496,cg18057469,cg14635654,cg18809947,cg01940915,cg00869530,cg04363228,cg24278033	chr6:32153656-32155382	1-00667,1-06506	2	cg14538532,cg00963496,cg06563066,cg18057469,cg14635654,cg18809947,cg01940915,cg10608731,cg00869530,cg04363228,cg02464568
chr6	32154972	32154982	32154973	ETS1	1-00667	cg00963496,cg18057469,cg14635654,cg18809947,cg01940915,cg00869530,cg04363228,cg24278033	chr6:32153656-32155382	1-00667,1-06506	2	cg14538532,cg00963496,cg06563066,cg18057469,cg14635654,cg18809947,cg01940915,cg10608731,cg00869530,cg04363228,cg02464568
chr6	32154973	32154983	32154973	ELF1	1-00667	cg00963496,cg18057469,cg14635654,cg18809947,cg01940915,cg00869530,cg04363228,cg24278033	chr6:32153656-32155382	1-00667,1-06506	2	cg14538532,cg00963496,cg06563066,cg18057469,cg14635654,cg18809947,cg01940915,cg10608731,cg00869530,cg04363228,cg02464568
chr6	32808455	32808462	32808459	RUNX1	1-05675	cg25693349,cg12048225,cg12094903	chr6:32807894-32809495	1-04652,1-03191,1-05675,1-05888,1-06204,1-01019,1-01049,1-03897,1-04056,1-04466,1-02491,1-07555,1-04512	13	cg13871037,cg23750151,cg25693349,cg12048225,cg12094903,cg21621645,cg11954557,cg19646975,cg12718404,cg22510079,cg08992729,cg26988373,cg22158175,cg16009764
chr6	32808456	32808463	32808459	UAK30	1-05675	cg25693349,cg12048225,cg12094903	chr6:32807894-32809495	1-04652,1-03191,1-05675,1-05888,1-06204,1-01019,1-01049,1-03897,1-04056,1-04466,1-02491,1-07555,1-04512	13	cg13871037,cg23750151,cg25693349,cg12048225,cg12094903,cg21621645,cg11954557,cg19646975,cg12718404,cg22510079,cg08992729,cg26988373,cg22158175,cg16009764
chr6	33094060	33094080	33094069	UAK25	1-04333	cg18634516,cg19407960	chr6:33094068-33094830	1-04333	1	cg05137443,cg18198143,cg01246982,cg18634516,cg19407960
chr6	33094061	33094075	33094069	CTCF-ext	1-04333	cg18634516,cg19407960	chr6:33094068-33094830	1-04333	1	cg05137443,cg18198143,cg01246982,cg18634516,cg19407960
chr6	33094068	33094082	33094069	CTCF	1-04333	cg18634516,cg19407960	chr6:33094068-33094830	1-04333	1	cg05137443,cg18198143,cg01246982,cg18634516,cg19407960
chr6	33280526	33280547	33280545	EGR1	1-03538	cg03780271,cg12589538,cg18353226,cg14419102,cg06230948	chr6:33279562-33286245	1-00312,1-00400,1-04884,1-04920,1-05379,1-04631,1-02959,1-03191,1-00541,1-05675,1-03538,1-01049,1-03897,1-04071,1-04095,1-04112,1-01242,1-01553,1-01984,1-02024,1-02234,1-04139,1-04258,1-04270,1-04299,1-02491,1-08788,1-07419,1-07555,1-05443,1-05597,1-05613,1-02411,1-00347,1-04719,1-04774,1-04782,1-04835,1-05124,1-02874,1-05846,1-03422,1-03846,1-03972,1-01306,1-01869,1-06506,1-04400,1-04460,1-04466…	62	cg23922433,cg16632096,cg03780271,cg12589538,cg11796996,cg02863594,cg01253676,cg20998791,cg18353226,cg14419102,cg06375761,cg26083458,cg13638257,cg05700142,cg01654446,cg18930100,cg06230948,cg03591496,cg20973878,cg27020289,cg00274587,cg00558147,cg07500019,cg07955457,cg27385940,cg19493601,cg01801368,cg13295193,cg00285363,cg00225553,cg27539322,cg01199950,cg26293201,cg00534550,cg10007189,cg14006309,cg2…
chr6	33282821	33282835	33282824	CTCF	1-04920	cg06097707,cg25954512,cg18144560,cg11917542,cg03000593,cg13027595,cg01367322	chr6:33279562-33286245	1-00312,1-00400,1-04884,1-04920,1-05379,1-04631,1-02959,1-03191,1-00541,1-05675,1-03538,1-01049,1-03897,1-04071,1-04095,1-04112,1-01242,1-01553,1-01984,1-02024,1-02234,1-04139,1-04258,1-04270,1-04299,1-02491,1-08788,1-07419,1-07555,1-05443,1-05597,1-05613,1-02411,1-00347,1-04719,1-04774,1-04782,1-04835,1-05124,1-02874,1-05846,1-03422,1-03846,1-03972,1-01306,1-01869,1-06506,1-04400,1-04460,1-04466…	62	cg23922433,cg16632096,cg03780271,cg12589538,cg11796996,cg02863594,cg01253676,cg20998791,cg18353226,cg14419102,cg06375761,cg26083458,cg13638257,cg05700142,cg01654446,cg18930100,cg06230948,cg03591496,cg20973878,cg27020289,cg00274587,cg00558147,cg07500019,cg07955457,cg27385940,cg19493601,cg01801368,cg13295193,cg00285363,cg00225553,cg27539322,cg01199950,cg26293201,cg00534550,cg10007189,cg14006309,cg2…
chr6	34482583	34482604	34482599	EGR1	1-03996	cg23567719,cg02650929,cg11466109,cg02032966,cg18494134	chr6:34481793-34482680	1-00046,1-04719,1-04893,1-05379,1-02812,1-02876,1-02959,1-03190,1-03224,1-03258,1-05888,1-03639,1-03649,1-01075,1-03996,1-01384,1-06506,1-04460,1-02408,1-08788,1-07386,1-09064,1-05613	23	cg26162206,cg21927021,cg10173272,cg19349092,cg14254433,cg23567719,cg02650929,cg11466109,cg02032966,cg18494134
chr6	34482588	34482602	34482599	SP1	1-03996	cg23567719,cg02650929,cg11466109,cg02032966,cg18494134	chr6:34481793-34482680	1-00046,1-04719,1-04893,1-05379,1-02812,1-02876,1-02959,1-03190,1-03224,1-03258,1-05888,1-03639,1-03649,1-01075,1-03996,1-01384,1-06506,1-04460,1-02408,1-08788,1-07386,1-09064,1-05613	23	cg26162206,cg21927021,cg10173272,cg19349092,cg14254433,cg23567719,cg02650929,cg11466109,cg02032966,cg18494134
chr6	43142042	43142055	43142045	SRF	1-07442	cg13387216,cg12269535,cg20227255,cg07522644	chr6:43141968-43142360	1-04465,1-07442	2	cg13387216,cg12269535,cg20227255,cg07522644,cg22049732
chr6	43142361	43142375	43142375	ZNF263	1-07442	cg13387216,cg12269535,cg20227255,cg07522644	chr6:43141968-43142360	1-04465,1-07442	2	cg13387216,cg12269535,cg20227255,cg07522644,cg22049732
chr6	43142366	43142376	43142375	ZNF281	1-07442	cg13387216,cg12269535,cg20227255,cg07522644	chr6:43141968-43142360	1-04465,1-07442	2	cg13387216,cg12269535,cg20227255,cg07522644,cg22049732
chr6	43142367	43142388	43142375	UAK42	1-07442	cg13387216,cg12269535,cg20227255,cg07522644	chr6:43141968-43142360	1-04465,1-07442	2	cg13387216,cg12269535,cg20227255,cg07522644,cg22049732
chr6	43142371	43142385	43142375	PU1	1-07442	cg13387216,cg12269535,cg20227255,cg07522644	chr6:43141968-43142360	1-04465,1-07442	2	cg13387216,cg12269535,cg20227255,cg07522644,cg22049732
chr6	43142374	43142384	43142375	ETS1	1-07442	cg13387216,cg12269535,cg20227255,cg07522644	chr6:43141968-43142360	1-04465,1-07442	2	cg13387216,cg12269535,cg20227255,cg07522644,cg22049732
chr6	43276025	43276039	43276029	ZNF263	1-01989	cg18857062,cg05885123,cg13097407,cg25610702,cg14238325	chr6:43276477-43277257	1-01989,1-02411	2	cg18857062,cg05885123,cg11982736,cg27291698,cg21109265,cg13097407,cg25610702,cg18735214,cg14238325,cg25888384,cg12297077
chr6	55443998	55444017	55444001	E2F4	1-03665	cg26963356,cg06401021,cg21705897,cg13973820,cg15594967,cg22508969,cg05166820,cg06870213	chr6:55443832-55444822	1-03665	1	cg26963356,cg06401021,cg21705897,cg13973820,cg15594967,cg22508969,cg05166820,cg06870213,cg02566457,cg10380163,cg07369569
chr6	105389325	105389344	105389335	UAK42	1-00914	cg09727935,cg17885226	chr6:105387482-105389371	1-00304,1-04655,1-02959,1-00914,1-01306,1-02413	6	cg14228586,cg14246568,cg04744409,cg05513455,cg09727935,cg23746497,cg03738025,cg17885226,cg11070069
chr6	105389325	105389356	105389335	EGR1	1-00914	cg09727935,cg17885226	chr6:105387482-105389371	1-00304,1-04655,1-02959,1-00914,1-01306,1-02413	6	cg14228586,cg14246568,cg04744409,cg05513455,cg09727935,cg23746497,cg03738025,cg17885226,cg11070069
chr6	105389330	105389344	105389335	ZNF143	1-00914	cg09727935,cg17885226	chr6:105387482-105389371	1-00304,1-04655,1-02959,1-00914,1-01306,1-02413	6	cg14228586,cg14246568,cg04744409,cg05513455,cg09727935,cg23746497,cg03738025,cg17885226,cg11070069
chr6	108445000	108445011	108445009	BHLHE40	1-01049	cg25323841,cg12777106,cg17176470	chr6:108442527-108445535	1-02413,1-00157,1-00319,1-04870,1-04975,1-05009,1-02917,1-02959,1-03038,1-03059,1-00625,1-03676,1-01049,1-02264,1-06506,1-07026,1-07084,1-07442,1-04523,1-05635,1-04865,1-04926,1-02627	23	cg15190445,cg25782375,cg15241799,cg22974681,cg25323841,cg12777106,cg26298967,cg17176470,cg02532824,cg03707974,cg00795630,cg08498208
chr6	109557760	109557780	109557770	UAK25	1-03578	cg02844387,cg16075940,cg16926446	chr6:109557127-109557895	1-00034,1-00112,1-00319,1-00770,1-04865,1-04884,1-04920,1-04921,1-05124,1-05379,1-02874,1-02959,1-03190,1-00825,1-00874,1-03578,1-04164,1-04376,1-07442	19	cg12700644,cg02844387,cg16075940,cg05819613,cg10946644,cg16926446
chr6	110721175	110721189	110721187	CTCF	1-00319	cg00847453,cg13266496	chr6:110720500-110721630	1-00319,1-00344,1-00347,1-04774,1-04855,1-11800,1-05360,1-02652,1-02841,1-05999,1-03472,1-01075,1-01174,1-01577,1-04258,1-02413,1-04512,1-05597	18	cg00847453,cg13266496,cg19196401,cg00083206,cg01119278,cg12078872
chr6	150070575	150070589	150070583	YY1	1-00874	cg22239180,cg15181151,cg00933542	chr6:150070029-150070998	1-00874	1	cg13262909,cg22239180,cg08662619,cg15181151,cg00933542,cg17940234,cg00964055,cg07671221,cg08634157,cg26204416,cg02043083
chr6	164393352	164393366	164393356	CTCF	1-05888	cg07876823,cg04534697,cg05170671,cg12793096,cg08836375	chr6:164393350-164393861	1-05888,1-02411	2	cg26656672,cg04534697,cg05170671,cg12793096,cg08836375,cg11588637
chr7	948638	948652	948644	CTCF	1-02491	cg25612754,cg19665696,cg14597098	chr7:948566-949391	1-00041,1-00770,1-03059,1-00856,1-02491	5	cg25612754,cg19665696,cg14597098
chr7	948644	948654	948644	UAK26	1-02491	cg25612754,cg19665696,cg14597098	chr7:948566-949391	1-00041,1-00770,1-03059,1-00856,1-02491	5	cg25612754,cg19665696,cg14597098
chr7	1026227	1026246	1026237	GATA1-ext	1-04333	cg08911208,cg23332328,cg08883853,cg05183927	chr7:1025759-1026364	1-04655,1-05124,1-01174,1-04333	4	cg08911208,cg07131210,cg23332328,cg08883853,cg05183927
chr7	1026227	1026246	1026237	GATA1-ext	1-05124	cg08911208,cg07131210,cg23332328,cg08883853,cg05183927,cg24286812	chr7:1025759-1026364	1-04655,1-05124,1-01174,1-04333	4	cg08911208,cg07131210,cg23332328,cg08883853,cg05183927
chr7	1026228	1026237	1026237	GATA1	1-04333	cg08911208,cg23332328,cg08883853,cg05183927	chr7:1025759-1026364	1-04655,1-05124,1-01174,1-04333	4	cg08911208,cg07131210,cg23332328,cg08883853,cg05183927
chr7	1026228	1026237	1026237	GATA1	1-05124	cg08911208,cg07131210,cg23332328,cg08883853,cg05183927,cg24286812	chr7:1025759-1026364	1-04655,1-05124,1-01174,1-04333	4	cg08911208,cg07131210,cg23332328,cg08883853,cg05183927
chr7	1026230	1026237	1026237	TAL1	1-04333	cg08911208,cg23332328,cg08883853,cg05183927	chr7:1025759-1026364	1-04655,1-05124,1-01174,1-04333	4	cg08911208,cg07131210,cg23332328,cg08883853,cg05183927
chr7	1026230	1026237	1026237	TAL1	1-05124	cg08911208,cg07131210,cg23332328,cg08883853,cg05183927,cg24286812	chr7:1025759-1026364	1-04655,1-05124,1-01174,1-04333	4	cg08911208,cg07131210,cg23332328,cg08883853,cg05183927
chr7	1199888	1199903	1199903	PAX5	1-02627	cg18765753,cg06518099,cg12950816,cg07092213,cg18810651	chr7:1198404-1199937	1-04865,1-04870,1-04915,1-04920,1-05007,1-05093,1-02627,1-02917,1-06248,1-06321,1-00874,1-03538,1-00894,1-03842,1-04113,1-01256,1-04460,1-04466,1-04523	19	cg11152057,cg15112475,cg16145915,cg05779406,cg18765753,cg06518099,cg12950816,cg07092213,cg14725302,cg14680629,cg09177884,cg02984159,cg01763702,cg21384277,cg10494556
chr7	1199890	1199910	1199903	UAK17	1-02627	cg18765753,cg06518099,cg12950816,cg07092213,cg18810651	chr7:1198404-1199937	1-04865,1-04870,1-04915,1-04920,1-05007,1-05093,1-02627,1-02917,1-06248,1-06321,1-00874,1-03538,1-00894,1-03842,1-04113,1-01256,1-04460,1-04466,1-04523	19	cg11152057,cg15112475,cg16145915,cg05779406,cg18765753,cg06518099,cg12950816,cg07092213,cg14725302,cg14680629,cg09177884,cg02984159,cg01763702,cg21384277,cg10494556
chr7	1199898	1199915	1199903	NRF1	1-02627	cg18765753,cg06518099,cg12950816,cg07092213,cg18810651	chr7:1198404-1199937	1-04865,1-04870,1-04915,1-04920,1-05007,1-05093,1-02627,1-02917,1-06248,1-06321,1-00874,1-03538,1-00894,1-03842,1-04113,1-01256,1-04460,1-04466,1-04523	19	cg11152057,cg15112475,cg16145915,cg05779406,cg18765753,cg06518099,cg12950816,cg07092213,cg14725302,cg14680629,cg09177884,cg02984159,cg01763702,cg21384277,cg10494556
chr7	1781991	1782012	1782012	EGR1	1-02491	cg19233829,cg21873954,cg20953563,cg17890940	chr7:1781917-1782756	1-04901,1-04915,1-04926,1-05124,1-00543,1-00652,1-05726,1-00808,1-03627,1-01174,1-03897,1-01242,1-02234,1-06506,1-04299,1-02491,1-04624	17	cg19233829,cg15050051,cg21873954,cg20953563,cg17890940,cg25706012
chr7	1895649	1895659	1895649	USF	1-04512	cg13447684,cg25397636	chr7:1894024-1897375	1-03374,1-01260,1-02097,1-04865,1-04870,1-04901,1-02963,1-00652,1-03627,1-01174,1-04164,1-06506,1-07026,1-04400,1-02425,1-04512,1-05476	17	cg08551333,cg09367467,cg25432518,cg26220185,cg23524191,cg24706966,cg13447684,cg25397636,cg05279229,cg09831614,cg21852842,cg12538522
chr7	4831949	4831970	4831959	EGR1	1-05476	cg18271789,cg18834058,cg00913283,cg11536851,cg26181334	chr7:4832111-4832536	1-00046,1-00157,1-04719,1-04774,1-04835,1-04920,1-04921,1-11800,1-05174,1-02786,1-02918,1-05846,1-06321,1-03627,1-03639,1-03665,1-03676,1-04203,1-06506,1-02324,1-04540,1-05476,1-05570	23	cg18271789,cg18834058,cg00913283,cg11536851,cg26181334
chr7	4831955	4831969	4831959	UAK42	1-05476	cg18271789,cg18834058,cg00913283,cg11536851,cg26181334	chr7:4832111-4832536	1-00046,1-00157,1-04719,1-04774,1-04835,1-04920,1-04921,1-11800,1-05174,1-02786,1-02918,1-05846,1-06321,1-03627,1-03639,1-03665,1-03676,1-04203,1-06506,1-02324,1-04540,1-05476,1-05570	23	cg18271789,cg18834058,cg00913283,cg11536851,cg26181334
chr7	5271657	5271671	5271670	PU1	1-04911	cg26660312,cg00579868,cg09203501	chr7:5271479-5272276	1-00319,1-04911,1-01553,1-04512	4	cg26660312,cg00579868,cg09203501,cg15277378,cg20099458
chr7	11012851	11012865	11012855	NFY	1-05124	cg14336854,cg07230486,cg27578754	chr7:11012870-11013817	1-05124,1-04523	2	cg14336854,cg07230486,cg27578754,cg15760052,cg23083824,cg07287563,cg22477374,cg07378472,cg16800461,cg24491907,cg06715026,cg13029706,cg07574654,cg22876561,cg11931558,cg20964328
chr7	26191805	26191819	26191816	CTCF	1-01017	cg14644871	chr7:26192198-26193608	1-01017,1-03298,1-04112,1-02491,1-05597	5	cg07986525,cg14644871,cg21699330,cg10536999,cg08822075
chr7	26191806	26191827	26191816	EGR1	1-01017	cg14644871	chr7:26192198-26193608	1-01017,1-03298,1-04112,1-02491,1-05597	5	cg07986525,cg14644871,cg21699330,cg10536999,cg08822075
chr7	26191807	26191821	26191816	UA3	1-01017	cg14644871	chr7:26192198-26193608	1-01017,1-03298,1-04112,1-02491,1-05597	5	cg07986525,cg14644871,cg21699330,cg10536999,cg08822075
chr7	26191807	26191821	26191816	UAK42	1-01017	cg14644871	chr7:26192198-26193608	1-01017,1-03298,1-04112,1-02491,1-05597	5	cg07986525,cg14644871,cg21699330,cg10536999,cg08822075
chr7	26191811	26191825	26191816	SP1	1-01017	cg14644871	chr7:26192198-26193608	1-01017,1-03298,1-04112,1-02491,1-05597	5	cg07986525,cg14644871,cg21699330,cg10536999,cg08822075
chr7	27170597	27170616	27170609	E2F1	1-00150	cg22997113,cg04317399,cg07317062,cg19142026,cg11410718,cg16651126,cg11015251,cg17457637,cg03724423,cg14359292,cg25967031	chr7:27168779-27171529	1-06370,1-01019,1-06690,1-05613,1-01218,1-01256,1-04506,1-00034,1-04835,1-04865,1-03298,1-05926,1-03394,1-01242,1-01306,1-04460,1-00046,1-00150,1-00739,1-04652,1-04911,1-04915,1-04975,1-05009,1-05360,1-00541,1-05675,1-03472,1-04112,1-02260,1-06506,1-06988,1-02491,1-00702,1-02926,1-03059,1-01053,1-04400,1-04537,1-05437,1-06498,1-06204,1-00423,1-05379,1-03627,1-03996	46	cg02706018,cg09574499,cg21367811,cg14042889,cg17132446,cg11227540,cg20171892,cg09799676,cg11532431,cg00562553,cg23884241,cg22997113,cg04317399,cg07317062,cg19142026,cg11410718,cg16651126,cg11015251,cg17457637,cg03724423,cg08657492,cg14359292,cg25952581,cg24169822,cg17591595,cg11908057,cg25967031,cg15196806,cg15624376,cg20161965,cg08203284
chr7	27170598	27170612	27170609	NRF1	1-00150	cg22997113,cg04317399,cg07317062,cg19142026,cg11410718,cg16651126,cg11015251,cg17457637,cg03724423,cg14359292,cg25967031	chr7:27168779-27171529	1-06370,1-01019,1-06690,1-05613,1-01218,1-01256,1-04506,1-00034,1-04835,1-04865,1-03298,1-05926,1-03394,1-01242,1-01306,1-04460,1-00046,1-00150,1-00739,1-04652,1-04911,1-04915,1-04975,1-05009,1-05360,1-00541,1-05675,1-03472,1-04112,1-02260,1-06506,1-06988,1-02491,1-00702,1-02926,1-03059,1-01053,1-04400,1-04537,1-05437,1-06498,1-06204,1-00423,1-05379,1-03627,1-03996	46	cg02706018,cg09574499,cg21367811,cg14042889,cg17132446,cg11227540,cg20171892,cg09799676,cg11532431,cg00562553,cg23884241,cg22997113,cg04317399,cg07317062,cg19142026,cg11410718,cg16651126,cg11015251,cg17457637,cg03724423,cg08657492,cg14359292,cg25952581,cg24169822,cg17591595,cg11908057,cg25967031,cg15196806,cg15624376,cg20161965,cg08203284
chr7	38351342	38351349	38351347	UAK49	1-03298	cg06132400,cg07076816	chr7:38350920-38351469	1-00046,1-00197,1-04782,1-04870,1-04893,1-05007,1-05379,1-02627,1-03038,1-03059,1-03298,1-05926,1-00982,1-03639,1-03652,1-01075,1-01238,1-01242,1-01306,1-01869,1-01989,1-06690,1-07593,1-05437,1-05613	25	cg15181598,cg06132400,cg25335841,cg07076816,cg00739278,cg24735210
chr7	44105274	44105294	44105292	ZNF143-ext	1-07442	cg14219560,cg17459793,cg07075347,cg16627090,cg23616741	chr7:44103275-44106378	1-00423,1-11800,1-05888,1-01553,1-02234,1-05597,1-00801,1-00389,1-04655,1-04975,1-02959,1-01238,1-01444,1-02283,1-06506,1-02413,1-04631,1-00543,1-00818,1-03825,1-03894,1-06643,1-04367,1-04466,1-07442,1-05476,1-05613,1-05379,1-06204	29	cg02237368,cg09624514,cg25950899,cg14219560,cg17459793,cg21448875,cg07075347,cg16627090,cg03470754,cg23616741,cg21088488,cg01953390,cg20284000
chr7	48019430	48019437	48019433	UAK30	1-03991	cg07721756,cg14171882	chr7:48018529-48019714	1-00761,1-02874,1-03374,1-03422,1-03842,1-03991,1-01242,1-02024	8	cg10190813,cg12034229,cg04794120,cg27019250,cg07721756,cg14171882,cg03216229,cg18845277
chr7	55641906	55641916	55641913	ETS1	1-04911	cg04227949,cg26406433,cg24780509	chr7:55641048-55641906	1-04911	1	cg26106590,cg04227949,cg26406433,cg24780509
chr7	55641906	55641920	55641913	STAT1	1-04911	cg04227949,cg26406433,cg24780509	chr7:55641048-55641906	1-04911	1	cg26106590,cg04227949,cg26406433,cg24780509
chr7	63361090	63361104	63361092	ZNF143	1-05124	cg20564496,cg27599129	chr7:63358553-63361618	1-05597,1-00174,1-04655,1-04921,1-02917,1-02959,1-03298,1-03394,1-00914,1-01049,1-03894,1-05635,1-05124,1-02926,1-03038,1-03059,1-03627,1-02097,1-04333,1-07555,1-07593	21	cg03920152,cg08745199,cg12417729,cg00667893,cg04535924,cg26911611,cg03124146,cg20564496,cg27599129,cg12479444,cg26916862
chr7	64541589	64541609	64541602	ZNF143-ext	1-03578	cg20849893,cg04775059	chr7:64541192-64541924	1-04901,1-05093,1-02918,1-02963,1-03437,1-03578,1-03627,1-06506,1-06988,1-04472	10	cg20849893,cg04775059,cg07806771,cg12143784
chr7	64541599	64541613	64541602	UAK42	1-03578	cg20849893,cg04775059	chr7:64541192-64541924	1-04901,1-05093,1-02918,1-02963,1-03437,1-03578,1-03627,1-06506,1-06988,1-04472	10	cg20849893,cg04775059,cg07806771,cg12143784
chr7	89840924	89840945	89840939	EGR1	1-05476	cg27503351,cg27367526	chr7:89839864-89842742	1-05174,1-02283,1-02413,1-05437,1-03538,1-02234,1-07278,1-07442,1-05420,1-05476,1-05613	11	cg26904169,cg27503351,cg14884160,cg06978680,cg03688058,cg27626102,cg13577744,cg03441409,cg20895785,cg21486465,cg23187387,cg23081580,cg14110380,cg12656475,cg09450020,cg27367526,cg02206373,cg17548689,cg06489385,cg26521402
chr7	89840932	89840946	89840939	CTCF	1-05476	cg27503351,cg27367526	chr7:89839864-89842742	1-05174,1-02283,1-02413,1-05437,1-03538,1-02234,1-07278,1-07442,1-05420,1-05476,1-05613	11	cg26904169,cg27503351,cg14884160,cg06978680,cg03688058,cg27626102,cg13577744,cg03441409,cg20895785,cg21486465,cg23187387,cg23081580,cg14110380,cg12656475,cg09450020,cg27367526,cg02206373,cg17548689,cg06489385,cg26521402
chr7	101961438	101961445	101961445	UAK20	1-11800	cg24707573,cg17190891,cg08952306	chr7:101961795-101962226	1-00174,1-00517,1-11800,1-03059,1-03190,1-00655,1-00808,1-01053,1-03897,1-04190,1-02413,1-04512,1-05476	13	cg24707573,cg17190891,cg08952306,cg10380461
chr7	101961445	101961457	101961445	POU2F2	1-11800	cg24707573,cg17190891,cg08952306	chr7:101961795-101962226	1-00174,1-00517,1-11800,1-03059,1-03190,1-00655,1-00808,1-01053,1-03897,1-04190,1-02413,1-04512,1-05476	13	cg24707573,cg17190891,cg08952306,cg10380461
chr7	135347128	135347142	135347138	CTCF	1-05174	cg24405174,cg17960959,cg07804024	chr7:135346061-135347372	1-00071,1-00508,1-04652,1-04719,1-04911,1-05124,1-05174,1-02917,1-00541,1-03840,1-03991,1-04113,1-07033,1-07551	14	cg00795791,cg24405174,cg17960959,cg07804024,cg08684565,cg00728361,cg19897172,cg07331761,cg25390506,cg10214576,cg10097556,cg04354344,cg02099548
chr7	135347130	135347150	135347138	UAK25	1-05174	cg24405174,cg17960959,cg07804024	chr7:135346061-135347372	1-00071,1-00508,1-04652,1-04719,1-04911,1-05124,1-05174,1-02917,1-00541,1-03840,1-03991,1-04113,1-07033,1-07551	14	cg00795791,cg24405174,cg17960959,cg07804024,cg08684565,cg00728361,cg19897172,cg07331761,cg25390506,cg10214576,cg10097556,cg04354344,cg02099548
chr7	135347137	135347156	135347138	UAK21	1-05174	cg24405174,cg17960959,cg07804024	chr7:135346061-135347372	1-00071,1-00508,1-04652,1-04719,1-04911,1-05124,1-05174,1-02917,1-00541,1-03840,1-03991,1-04113,1-07033,1-07551	14	cg00795791,cg24405174,cg17960959,cg07804024,cg08684565,cg00728361,cg19897172,cg07331761,cg25390506,cg10214576,cg10097556,cg04354344,cg02099548
chr7	150653094	150653113	150653108	E2F4	1-00543	cg02711872,cg14778552,cg20142972,cg24830730,cg20852154,cg08900098	chr7:150652701-150655388	1-02900,1-03038,1-03159,1-00543,1-04506,1-04540,1-06506	7	cg02711872,cg14778552,cg20142972,cg14711997,cg20883831,cg15472092,cg18296036,cg24830730,cg20852154,cg08900098,cg22060869,cg04406307,cg01539854,cg16817992,cg27435498
chr7	150653094	150653113	150653108	E2F4	1-04506	cg24830730,cg20852154	chr7:150652701-150655388	1-02900,1-03038,1-03159,1-00543,1-04506,1-04540,1-06506	7	cg02711872,cg14778552,cg20142972,cg14711997,cg20883831,cg15472092,cg18296036,cg24830730,cg20852154,cg08900098,cg22060869,cg04406307,cg01539854,cg16817992,cg27435498
chr7	150653104	150653118	150653108	UAK42	1-00543	cg02711872,cg14778552,cg20142972,cg24830730,cg20852154,cg08900098	chr7:150652701-150655388	1-02900,1-03038,1-03159,1-00543,1-04506,1-04540,1-06506	7	cg02711872,cg14778552,cg20142972,cg14711997,cg20883831,cg15472092,cg18296036,cg24830730,cg20852154,cg08900098,cg22060869,cg04406307,cg01539854,cg16817992,cg27435498
chr7	150653104	150653118	150653108	UAK42	1-04506	cg24830730,cg20852154	chr7:150652701-150655388	1-02900,1-03038,1-03159,1-00543,1-04506,1-04540,1-06506	7	cg02711872,cg14778552,cg20142972,cg14711997,cg20883831,cg15472092,cg18296036,cg24830730,cg20852154,cg08900098,cg22060869,cg04406307,cg01539854,cg16817992,cg27435498
chr7	150705956	150705983	150705968	CREB-ext	1-01989	cg20498962,cg10501602,cg00700487	chr7:150705357-150706356	1-04782,1-04920,1-05124,1-02841,1-05977,1-00808,1-00876,1-03996,1-01238,1-01989,1-04252,1-06506	12	cg07643980,cg20498962,cg10501602,cg00700487,cg07841866,cg24032393
chr7	150705956	150705983	150705968	CREB-ext	1-04782	cg20498962,cg10501602,cg00700487	chr7:150705357-150706356	1-04782,1-04920,1-05124,1-02841,1-05977,1-00808,1-00876,1-03996,1-01238,1-01989,1-04252,1-06506	12	cg07643980,cg20498962,cg10501602,cg00700487,cg07841866,cg24032393
chr7	150705960	150705980	150705968	UAK25	1-01989	cg20498962,cg10501602,cg00700487	chr7:150705357-150706356	1-04782,1-04920,1-05124,1-02841,1-05977,1-00808,1-00876,1-03996,1-01238,1-01989,1-04252,1-06506	12	cg07643980,cg20498962,cg10501602,cg00700487,cg07841866,cg24032393
chr7	150705960	150705980	150705968	UAK25	1-04782	cg20498962,cg10501602,cg00700487	chr7:150705357-150706356	1-04782,1-04920,1-05124,1-02841,1-05977,1-00808,1-00876,1-03996,1-01238,1-01989,1-04252,1-06506	12	cg07643980,cg20498962,cg10501602,cg00700487,cg07841866,cg24032393
chr7	150705966	150705980	150705968	UA3	1-01989	cg20498962,cg10501602,cg00700487	chr7:150705357-150706356	1-04782,1-04920,1-05124,1-02841,1-05977,1-00808,1-00876,1-03996,1-01238,1-01989,1-04252,1-06506	12	cg07643980,cg20498962,cg10501602,cg00700487,cg07841866,cg24032393
chr7	150705966	150705980	150705968	UA3	1-04782	cg20498962,cg10501602,cg00700487	chr7:150705357-150706356	1-04782,1-04920,1-05124,1-02841,1-05977,1-00808,1-00876,1-03996,1-01238,1-01989,1-04252,1-06506	12	cg07643980,cg20498962,cg10501602,cg00700487,cg07841866,cg24032393
chr7	150705968	150705982	150705968	CTCF	1-01989	cg20498962,cg10501602,cg00700487	chr7:150705357-150706356	1-04782,1-04920,1-05124,1-02841,1-05977,1-00808,1-00876,1-03996,1-01238,1-01989,1-04252,1-06506	12	cg07643980,cg20498962,cg10501602,cg00700487,cg07841866,cg24032393
chr7	150705968	150705982	150705968	CTCF	1-04782	cg20498962,cg10501602,cg00700487	chr7:150705357-150706356	1-04782,1-04920,1-05124,1-02841,1-05977,1-00808,1-00876,1-03996,1-01238,1-01989,1-04252,1-06506	12	cg07643980,cg20498962,cg10501602,cg00700487,cg07841866,cg24032393
chr7	152591650	152591675	152591667	UAK25	1-00808	cg06186727,cg05675331,cg16806794	chr7:152591098-152592836	1-00389,1-00652,1-00808,1-01238,1-06506	5	cg14093419,cg16911872,cg06186727,cg05675331,cg16806794,cg08540945,cg11892345,cg21027035,cg20546279,cg16768191,cg18450319
chr7	153584294	153584308	153584301	CTCF	1-03578	cg00064733,cg19274890,cg22620221	chr7:153583317-153586593	1-04655,1-04164,1-03578,1-01306,1-02627,1-01984,1-07004,1-05613	8	cg00017489,cg09215287,cg19161124,cg00064733,cg19274890,cg08963505,cg21048052,cg22620221,cg06495961,cg14523847,cg27032232,cg24011260,cg03532926,cg14564076,cg05228237,cg22449370,cg22482235,cg22340526,cg16251205
chr7	154861888	154861909	154861902	E2F4	1-03534	cg21633143,cg08757963,cg15835825,cg13450708,cg00903099,cg11298960,cg25780543	chr7:154861568-154864631	1-03534,1-06506,1-00739,1-04719,1-04975,1-02627,1-03038,1-00645,1-05673,1-06321,1-01238,1-05476,1-04252	13	cg12580770,cg13852491,cg11668314,cg21633143,cg08757963,cg15835825,cg23757489,cg13450708,cg00903099,cg11298960,cg25780543,cg00852398,cg09125907,cg25058023,cg03024742,cg13892088,cg10538202,cg09623773,cg21305609,cg15502740,cg07648740
chr7	154861892	154861906	154861902	E2F1	1-03534	cg21633143,cg08757963,cg15835825,cg13450708,cg00903099,cg11298960,cg25780543	chr7:154861568-154864631	1-03534,1-06506,1-00739,1-04719,1-04975,1-02627,1-03038,1-00645,1-05673,1-06321,1-01238,1-05476,1-04252	13	cg12580770,cg13852491,cg11668314,cg21633143,cg08757963,cg15835825,cg23757489,cg13450708,cg00903099,cg11298960,cg25780543,cg00852398,cg09125907,cg25058023,cg03024742,cg13892088,cg10538202,cg09623773,cg21305609,cg15502740,cg07648740
chr7	155557052	155557065	155557065	AP1	1-01577	cg13639901,cg14430943,cg13904214	chr7:155556589-155556730	1-02652,1-01577	2	cg13639901,cg14430943,cg13904214
chr7	155557052	155557065	155557065	AP1	1-02652	cg13639901,cg14430943,cg13904214	chr7:155556589-155556730	1-02652,1-01577	2	cg13639901,cg14430943,cg13904214
chr7	156931645	156931659	156931653	CTCF	1-03374	cg01939428,cg02477380,cg08127460,cg13699657,cg00282683,cg11230343	chr7:156931169-156932164	1-03374	1	cg01939428,cg05868448,cg02477380,cg08127460,cg13699657,cg00282683,cg11230343
chr8	216043	216063	216062	ZNF143-ext	1-05926	cg17920646,cg24536782,cg14317384	chr8:215922-216789	1-00312,1-00797,1-04652,1-05360,1-02793,1-00541,1-05726,1-05926,1-00982,1-01019,1-02183,1-02234	12	cg07230991,cg17920646,cg24536782,cg03116837,cg14317384
chr8	638263	638273	638271	ELF1	1-00761	cg08454824,cg14755254,cg01053087,cg12641240	chr8:637131-638331	1-00761,1-00801,1-11800,1-05007,1-06321,1-03472,1-03538,1-00914,1-01577,1-07419,1-02769,1-02926,1-03627,1-06537	14	cg10897311,cg08454824,cg14755254,cg01053087,cg05875700,cg12641240
chr8	638265	638286	638271	EGR1	1-00761	cg08454824,cg14755254,cg01053087,cg12641240	chr8:637131-638331	1-00761,1-00801,1-11800,1-05007,1-06321,1-03472,1-03538,1-00914,1-01577,1-07419,1-02769,1-02926,1-03627,1-06537	14	cg10897311,cg08454824,cg14755254,cg01053087,cg05875700,cg12641240
chr8	638267	638281	638271	UAK42	1-00761	cg08454824,cg14755254,cg01053087,cg12641240	chr8:637131-638331	1-00761,1-00801,1-11800,1-05007,1-06321,1-03472,1-03538,1-00914,1-01577,1-07419,1-02769,1-02926,1-03627,1-06537	14	cg10897311,cg08454824,cg14755254,cg01053087,cg05875700,cg12641240
chr8	2585248	2585267	2585264	E2F4	1-05124	cg01649497,cg24475182,cg21603676,cg23099839,cg03427322	chr8:2584440-2586912	1-04693,1-02841,1-03059,1-00808,1-00871,1-03676,1-04523,1-09064,1-05476,1-03275,1-00034,1-00304,1-00770,1-04692,1-05007,1-05124,1-02627,1-02876,1-02926,1-04631,1-03001,1-00655,1-03224,1-05888,1-00894,1-01045,1-01238,1-01306,1-01384,1-06506,1-02491,1-07386,1-01049,1-00197	34	cg20155714,cg12652144,cg03985300,cg01649497,cg24475182,cg21603676,cg23099839,cg03427322,cg02210441,cg11779808,cg21409873,cg22067617
chr8	2585384	2585412	2585397	E2F4	1-02491	cg01649497,cg02210441	chr8:2584440-2586912	1-04693,1-02841,1-03059,1-00808,1-00871,1-03676,1-04523,1-09064,1-05476,1-03275,1-00034,1-00304,1-00770,1-04692,1-05007,1-05124,1-02627,1-02876,1-02926,1-04631,1-03001,1-00655,1-03224,1-05888,1-00894,1-01045,1-01238,1-01306,1-01384,1-06506,1-02491,1-07386,1-01049,1-00197	34	cg20155714,cg12652144,cg03985300,cg01649497,cg24475182,cg21603676,cg23099839,cg03427322,cg02210441,cg11779808,cg21409873,cg22067617
chr8	11665841	11665855	11665850	CTCF	1-00825	cg02043966,cg15982002,cg22462396	chr8:11665773-11666811	1-00080,1-00319,1-00761,1-00797,1-00801,1-04719,1-04835,1-04865,1-04893,1-04921,1-04975,1-05009,1-03275,1-05726,1-05888,1-06204,1-00808,1-00825,1-00871,1-03437,1-03627,1-01174,1-01190,1-04113,1-01242,1-02260,1-04460,1-04472,1-02491,1-07593,1-00046	31	cg19600482,cg18696330,cg20753749,cg00262122,cg14164315,cg11598005,cg13963446,cg06140973,cg12568669,cg15982002,cg16672706,cg07242977,cg00856667,cg02160773,cg22462396,cg03613557
chr8	17434110	17434124	17434116	CTCF	1-03846	cg07120993,cg18901963,cg15779323,cg25912517	chr8:17432758-17434806	1-00702,1-11800,1-02917,1-05726,1-03639,1-03652,1-01053,1-03846,1-01260,1-04139,1-02324,1-04774,1-05093,1-00874,1-02264	15	cg27615537,cg07120993,cg05555116,cg18901963,cg15779323,cg25912517,cg08533932,cg24049348,cg22139555,cg11899374,cg14860473,cg04681849,cg10293422,cg23881204,cg08518568,cg16800975,cg15643885,cg10160407
chr8	21924363	21924382	21924373	E2F4	1-04460	cg21212977,cg09562539,cg14746762,cg25985013,cg27315996	chr8:21924152-21925649	1-00655,1-04460,1-04472,1-11800,1-05635	5	cg23897733,cg23896874,cg09562539,cg14746762,cg25985013,cg27315996,cg14737816
chr8	67837846	67837867	67837864	EGR1	1-01017	cg08381628,cg05531694,cg26472499,cg21176629,cg08952300	chr8:67837946-67838801	1-01017	1	cg05531694,cg26472499,cg04729070,cg21176629,cg08952300,cg16943087
chr8	67837859	67837873	67837864	UA3	1-01017	cg08381628,cg05531694,cg26472499,cg21176629,cg08952300	chr8:67837946-67838801	1-01017	1	cg05531694,cg26472499,cg04729070,cg21176629,cg08952300,cg16943087
chr8	67837859	67837873	67837864	UAK42	1-01017	cg08381628,cg05531694,cg26472499,cg21176629,cg08952300	chr8:67837946-67838801	1-01017	1	cg05531694,cg26472499,cg04729070,cg21176629,cg08952300,cg16943087
chr8	101348541	101348559	101348556	NFE2	1-06204	cg24450239,cg27190410,cg08096750,cg16149401	chr8:101348358-101348748	1-04855,1-04865,1-04975,1-02874,1-02918,1-02926,1-00541,1-06204,1-03665,1-03676,1-01190,1-03825,1-03996,1-06506,1-07026,1-02425	16	cg14021398,cg10334750,cg16450097,cg19235198,cg24450239,cg27190410,cg08096750,cg16149401
chr8	124194771	124194786	124194782	CTCF	1-07551	cg24833277,cg15893493,cg15425827,cg23067535,cg22384356,cg10955352,cg19924352	chr8:124193683-124195436	1-04901,1-02874,1-00543,1-00914,1-01019,1-01190,1-03897,1-01384,1-01805,1-04624,1-05420,1-00080,1-00770,1-00801,1-04893,1-04926,1-04095,1-04465,1-04466,1-00400,1-04920,1-06498,1-01989,1-02234,1-02260,1-02290,1-04506,1-02331,1-02491,1-07386,1-05597,1-05174,1-05675,1-07551,1-04652	35	cg03663469,cg02715629,cg04064769,cg22232107,cg25274915,cg03789719,cg03531754,cg24833277,cg10424125,cg15893493,cg15488733,cg20218614,cg15425827,cg23067535,cg22384356,cg10955352,cg19924352,cg04398409
chr8	124194780	124194794	124194782	UAK42	1-07551	cg24833277,cg15893493,cg15425827,cg23067535,cg22384356,cg10955352,cg19924352	chr8:124193683-124195436	1-04901,1-02874,1-00543,1-00914,1-01019,1-01190,1-03897,1-01384,1-01805,1-04624,1-05420,1-00080,1-00770,1-00801,1-04893,1-04926,1-04095,1-04465,1-04466,1-00400,1-04920,1-06498,1-01989,1-02234,1-02260,1-02290,1-04506,1-02331,1-02491,1-07386,1-05597,1-05174,1-05675,1-07551,1-04652	35	cg03663469,cg02715629,cg04064769,cg22232107,cg25274915,cg03789719,cg03531754,cg24833277,cg10424125,cg15893493,cg15488733,cg20218614,cg15425827,cg23067535,cg22384356,cg10955352,cg19924352,cg04398409
chr8	143858726	143858751	143858739	SP1	1-00982	cg22861548,cg08090164	chr8:143858074-143860091	1-00041,1-01049,1-00304,1-00423,1-04655,1-00914,1-00982,1-03676,1-03842,1-03894,1-01238,1-06506,1-06537,1-06988,1-04389,1-02413,1-07419,1-07442,1-07593,1-04523,1-05443,1-05635,1-04782,1-05009,1-02769,1-02959,1-00655,1-00818,1-04056,1-02024,1-06690,1-05597	32	cg01745932,cg17888033,cg04688051,cg05072100,cg03405983,cg20541178,cg15063259,cg10404336,cg20041105,cg12516270,cg05569086,cg15511327,cg22861548,cg08090164,cg19021188,cg00399059,cg23180489,cg25483741,cg03735656,cg10555383,cg23894907
chr8	144403606	144403617	144403613	UAK20	1-04835	cg00139947,cg02086839,cg13394182	chr8:144403125-144403455	1-00034,1-04835,1-04893,1-04920,1-03298,1-03840,1-07555	7	cg09174681,cg05207347,cg12164202,cg00139947,cg02086839,cg13394182
chr8	144403606	144403617	144403613	UAK20	1-04893	cg00139947,cg02086839,cg13394182	chr8:144403125-144403455	1-00034,1-04835,1-04893,1-04920,1-03298,1-03840,1-07555	7	cg09174681,cg05207347,cg12164202,cg00139947,cg02086839,cg13394182
chr8	144631666	144631682	144631680	v-Maf	1-02652	cg18649319,cg00404280,cg10438391,cg23106378	chr8:144631767-144632822	1-00319,1-00508,1-00667,1-02652,1-02900,1-00808,1-00894,1-00913,1-01049,1-01218,1-04056,1-04071,1-04112,1-02097,1-02234,1-07278,1-05420,1-05613	18	cg18649319,cg00404280,cg10438391,cg23106378,cg03012143,cg15362317,cg14878969
chr8	145162158	145162178	145162168	UAK25	1-07555	cg22836943,cg26796069,cg22147598	chr8:145161550-145164474	1-07555,1-00347,1-00423,1-00610,1-00645,1-03224,1-00856,1-03422,1-01174,1-02241,1-04164,1-00034	12	cg22481882,cg22836943,cg26796069,cg22147598,cg19978055,cg14771070,cg07195118,cg26272248,cg06239191,cg12439432,cg16311044,cg12588126
chr8	145162166	145162180	145162168	CTCF	1-07555	cg22836943,cg26796069,cg22147598	chr8:145161550-145164474	1-07555,1-00347,1-00423,1-00610,1-00645,1-03224,1-00856,1-03422,1-01174,1-02241,1-04164,1-00034	12	cg22481882,cg22836943,cg26796069,cg22147598,cg19978055,cg14771070,cg07195118,cg26272248,cg06239191,cg12439432,cg16311044,cg12588126
chr9	84304736	84304750	84304736	UAK42	1-06690	cg07852945,cg15563854,cg14616234	chr9:84303357-84304454	1-06204,1-06690,1-04588	3	cg20926353,cg14095100,cg07852945,cg15563854,cg08656326,cg08522731,cg09653072,cg11516875
chr9	95087756	95087777	95087763	EGR1	1-02411	cg14466709,cg16797502,cg25379649,cg14287170	chr9:95087589-95088468	1-02411	1	cg14466709,cg16797502,cg25379649,cg05265458,cg13798575,cg08919967,cg19058045,cg16656332,cg25927642,cg06102063,cg14597923,cg14287170,cg09824990
chr9	104249332	104249342	104249334	ELF1	1-00080	cg06359101,cg04849574,cg26081717	chr9:104248925-104249937	1-00080,1-00517,1-04901,1-00625,1-00652,1-03374,1-00808,1-03627,1-06506,1-06643,1-02408,1-02411,1-05597,1-00914	14	cg06912252,cg00056985,cg27099274,cg06359101,cg04849574,cg00067751,cg26081717,cg04387445,cg05823563
chr9	104249332	104249342	104249334	GABP	1-00080	cg06359101,cg04849574,cg26081717	chr9:104248925-104249937	1-00080,1-00517,1-04901,1-00625,1-00652,1-03374,1-00808,1-03627,1-06506,1-06643,1-02408,1-02411,1-05597,1-00914	14	cg06912252,cg00056985,cg27099274,cg06359101,cg04849574,cg00067751,cg26081717,cg04387445,cg05823563
chr9	104249333	104249340	104249334	ELF	1-00080	cg06359101,cg04849574,cg26081717	chr9:104248925-104249937	1-00080,1-00517,1-04901,1-00625,1-00652,1-03374,1-00808,1-03627,1-06506,1-06643,1-02408,1-02411,1-05597,1-00914	14	cg06912252,cg00056985,cg27099274,cg06359101,cg04849574,cg00067751,cg26081717,cg04387445,cg05823563
chr9	129883913	129883927	129883917	CTCF	1-00625	cg13508369,cg14281592,cg11213150	chr9:129884025-129884458	1-00739,1-02959,1-00625,1-05675,1-06506,1-04389,1-05597,1-05635	8	cg13508369,cg14281592,cg11213150
chr9	136150662	136150683	136150666	EGR1	1-02544	cg11879188,cg21160290,cg22535403	chr9:136149907-136150824	1-04926,1-05093,1-02544,1-00652,1-03258,1-04112,1-06506,1-06643,1-06690,1-02413,1-07084,1-07442,1-05420	13	cg11879188,cg21160290,cg22535403,cg13506600,cg12855781,cg11698867,cg07241568
chr9	136844607	136844617	136844616	UAK35	1-01256	cg13424940,cg15422377,cg21123355	chr9:136843858-136844769	1-00400,1-00702,1-04782,1-04893,1-05093,1-02917,1-00832,1-03422,1-01256,1-01869,1-04252,1-04506	12	cg03722346,cg13424940,cg15422377,cg21123355,cg13755204
chr9	138591373	138591382	138591380	BHLHE40	1-03627	cg14159004,cg00332421,cg05456618,cg05364762,cg14578284	chr9:138590203-138591855	1-06321,1-03627,1-06506	3	cg13558241,cg14393817,cg14159004,cg00332421,cg05456618,cg17708806,cg05364762,cg08092830,cg20921448
chr9	138591374	138591384	138591380	USF	1-03627	cg14159004,cg00332421,cg05456618,cg05364762,cg14578284	chr9:138590203-138591855	1-06321,1-03627,1-06506	3	cg13558241,cg14393817,cg14159004,cg00332421,cg05456618,cg17708806,cg05364762,cg08092830,cg20921448
chr9	140068058	140068077	140068067	E2F4	1-05009	cg04621850,cg01586330	chr9:140064013-140068072	1-00034,1-00423,1-01049,1-04056,1-04071,1-06506,1-06988,1-04460,1-02234,1-05420,1-00761,1-00770,1-05009,1-03159,1-05675,1-05726,1-05846,1-04920,1-03191,1-03897,1-02491,1-05476	22	cg14117166,cg22580065,cg07459895,cg18576861,cg13224090,cg14545670,cg06292259,cg06574229,cg10281361,cg14417917,cg04822710,cg09964650,cg09335354,cg16144493,cg05484618,cg11731280,cg08960443,cg04621850,cg01586330,cg07032852
chr9	140349283	140349297	140349294	NFIC	1-05673	cg04622454,cg09082427,cg12608784	chr9:140349127-140349970	1-00304,1-04652,1-05673,1-06506,1-04466	5	cg04622454,cg09082427,cg12608784,cg18157298,cg14140717,cg16629076
chr9	140349285	140349299	140349294	UA3	1-05673	cg04622454,cg09082427,cg12608784	chr9:140349127-140349970	1-00304,1-04652,1-05673,1-06506,1-04466	5	cg04622454,cg09082427,cg12608784,cg18157298,cg14140717,cg16629076
